# Supplementary material for: Circadian activity patterns of mammalian predators and prey in Costa Rica
Source: PubMed Central journal article supplement — J Mammal. 2020 Oct 3;101(5):1313–31. doi: 10.1093/jmammal/gyaa103 (PMC7733402; doi:10.1093/jmammal/gyaa103), 2020-10-03
Supplement: gyaa103_suppl_supplementary_data_1.pdf [file gyaa103_suppl_supplementary_data_1.pdf]

**Supplementary Data SD1.—** Percentage of photo records captured for all survey sites from 2010-2019.

| Common Name             | Scientific Name                  | Mass (kg) | N    | Day* | Night* | %Day | %Night | Classification** |
|-------------------------|----------------------------------|-----------|------|------|--------|------|--------|------------------|
| <i>Predator Species</i> |                                  |           |      |      |        |      |        |                  |
| Jaguar                  | <i>Panthera onca</i>             | 80.0      | 106  | 60   | 46     | 57   | 43     | Cathemeral       |
| Puma                    | <i>Puma concolor</i>             | 50.0      | 968  | 335  | 633    | 35   | 65     | Cathemeral       |
| Ocelot                  | <i>Leopardus pardalis</i>        | 12.0      | 590  | 85   | 505    | 14   | 86     | Mostly nocturnal |
| Coyote                  | <i>Canis latrans</i>             | 10.0      | 2853 | 717  | 2136   | 25   | 75     | Mostly nocturnal |
| Tayra                   | <i>Eira barbara</i>              | 5.0       | 238  | 212  | 26     | 89   | 11     | Mostly diurnal   |
| Jaguarundi              | <i>Herpailurus yaguarondi</i>    | 5.0       | 26   | 20   | 6      | 77   | 23     | Mostly diurnal   |
| Margay                  | <i>Leopardus wiedii</i>          | 3.5       | 27   | 2    | 25     | 7    | 93     | Nocturnal        |
| Oncilla                 | <i>Leopardus tigrina oncilla</i> | 2.0       | 197  | 40   | 157    | 20   | 80     | Mostly nocturnal |
| <i>Prey Species</i>     |                                  |           |      |      |        |      |        |                  |
| Baird's Tapir           | <i>Tapirus bairdii</i>           | 250.0     | 1708 | 271  | 1437   | 16   | 84     | Mostly nocturnal |
| White-Tailed Deer       | <i>Odocoileus virginianus</i>    | 30.0      | 333  | 249  | 84     | 75   | 25     | Mostly diurnal   |
| Red Brocket Deer        | <i>Mazama temama</i>             | 25.0      | 648  | 345  | 303    | 53   | 47     | Cathemeral       |
| Collared Peccary        | <i>Pecari tajacu</i>             | 19.0      | 1670 | 1255 | 415    | 75   | 25     | Mostly diurnal   |
| Paca                    | <i>Cuniculus paca</i>            | 10.0      | 1853 | 38   | 1815   | 2    | 98     | Nocturnal        |
| White-nosed Coati       | <i>Nasua narica</i>              | 5.0       | 1180 | 1078 | 102    | 91   | 9      | Diurnal          |
| Northern Tamandua       | <i>Tamandua mexicana</i>         | 4.5       | 123  | 13   | 110    | 11   | 89     | Mostly nocturnal |
| Northern Raccoon        | <i>Procyon lotor</i>             | 4.0       | 486  | 18   | 468    | 4    | 96     | Nocturnal        |
| Nine-banded Armadillo   | <i>Dasypus novemcitus</i>        | 4.0       | 313  | 9    | 304    | 3    | 97     | Nocturnal        |
| Agouti                  | <i>Dasyprocta punctata</i>       | 3.0       | 2314 | 2091 | 223    | 90   | 10     | Mostly diurnal   |
| White-headed Capuchin   | <i>Cebus capucinus</i>           | 3.0       | 52   | 49   | 3      | 94   | 6      | Diurnal          |
| Hog-Nosed Skunk         | <i>Conepatus semistriatus</i>    | 2.5       | 247  | 10   | 237    | 4    | 96     | Nocturnal        |
| Mexican Porcupine       | <i>Coendou mexicanus</i>         | 2.0       | 69   | 3    | 66     | 4    | 96     | Nocturnal        |
| Common Opossum          | <i>Didelphis marsupialis</i>     | 1.5       | 745  | 14   | 731    | 2    | 98     | Nocturnal        |
| Dice's cottontail       | <i>Sylvilagus dicei</i>          | 1.0       | 1300 | 46   | 1254   | 4    | 96     | Nocturnal        |
| Four-Eyed Opossum       | <i>Philander opossum</i>         | 0.5       | 156  | 7    | 149    | 4    | 96     | Nocturnal        |

\*Number of records classified as diurnal and nocturnal based on sunTime

\*\*Diurnal (<10% of records at night), nocturnal (≥90% of records at night), mostly diurnal (10–29% of records at night), mostly nocturnal (70–89% of records at night), or cathemeral (30–69% of records at night), in accordance with Gómez et al. (2005).
