# Supplementary material for: Circadian activity patterns of mammalian predators and prey in Costa Rica
Source: PubMed Central journal article supplement — J Mammal. 2020 Oct 3;101(5):1313–31. doi: 10.1093/jmammal/gyaa103 (PMC7733402; doi:10.1093/jmammal/gyaa103), 2020-10-03
Supplement: gyaa103_suppl_supplementary_data_2.pdf [file gyaa103_suppl_supplementary_data_2.pdf]

**Supplementary Data SD2.—** Major prey species from the literature for the 8 predators recorded in the camera trap study.

| Predator                                         | Prey                                                                                                                                                                                                                                                                                                                                                                                                                                                                                                                                                                                                                                                                                                                   | Sources                                                                                                                                                                                                                                                                                                                                                                                                                   |
|--------------------------------------------------|------------------------------------------------------------------------------------------------------------------------------------------------------------------------------------------------------------------------------------------------------------------------------------------------------------------------------------------------------------------------------------------------------------------------------------------------------------------------------------------------------------------------------------------------------------------------------------------------------------------------------------------------------------------------------------------------------------------------|---------------------------------------------------------------------------------------------------------------------------------------------------------------------------------------------------------------------------------------------------------------------------------------------------------------------------------------------------------------------------------------------------------------------------|
| Jaguar<br>( <i>Panthera onca</i> )               | Collared Peccary* ( <i>Pecari tajacu</i> ), White-tailed Deer ( <i>Odocoileus virginianus</i> ), Coati* ( <i>Nasua narica</i> ), Armadillo* ( <i>Dasybus novemcinctus</i> ), Raccoon ( <i>Procyon lotor</i> ), Central American Red Brocket Deer ( <i>Mazama temama</i> ), Paca ( <i>Cuniculus paca</i> ), Tamandua ( <i>Tamandua mexicana</i> ), Central American Agouti ( <i>Dasyprocta punctata</i> ), Opossums ( <i>Didelphidae</i> ), Common Gray four-eyed Opossum ( <i>Philander opossum</i> ), Dice's Cottontail ( <i>Sylvilagus dicei</i> )                                                                                                                                                                   | Aranda & Sanchez-Cordero (1996); Oliveira (2002); Garla <i>et al.</i> (2001); Medellín <i>et al.</i> (2002); Scognamillo <i>et al.</i> (2003); Novack <i>et al.</i> (2005); Weckel <i>et al.</i> (2006a,b); Foster <i>et al.</i> (2009); Gómez-Ortiz & Monroy-Vilchis (2013); Rueda <i>et al.</i> (2013); Hernández-Saintmartín <i>et al.</i> (2015); Arroyo-Arce <i>et al.</i> (2017); Ávila-Nájera <i>et al.</i> (2018) |
| Puma<br>( <i>Puma concolor</i> )                 | Rodents ( <i>Rodentia</i> ), White-tailed Deer ( <i>Odocoileus virginianus</i> ), Armadillo ( <i>Dasybus novemcinctus</i> ), Dice's Cottontail ( <i>Sylvilagus dicei</i> ), Collared Peccary* ( <i>Pecari tajacu</i> ), Raccoon ( <i>Procyon lotor</i> ), Coati ( <i>Nasua narica</i> ), Paca* ( <i>Cuniculus paca</i> ), Coyote ( <i>Canis latrans</i> ), Striped Hog-nosed Skunk ( <i>Conepatus semistriatus</i> ), Central American Red Brocket Deer* ( <i>Mazama temama</i> ), Tamandua ( <i>Tamandua mexicana</i> ), Central American Agouti* ( <i>Dasyprocta punctata</i> ), Opossums ( <i>Didelphidae</i> ), Porcupine ( <i>Coendou mexicanus</i> ), Common Gray Four-eyed Opossum ( <i>Philander opossum</i> ) | Aranda & Sanchez-Cordero (1996); Oliveira (2002); Scognamillo <i>et al.</i> (2003); Novack <i>et al.</i> (2005); Moreno <i>et al.</i> (2006); Foster <i>et al.</i> (2010); Monroy-Vilchis <i>et al.</i> (2009); Gómez-Ortiz <i>et al.</i> (2011); Gómez-Ortiz & Monroy-Vilchis (2013); Rueda <i>et al.</i> (2013); Hernández-Saintmartín <i>et al.</i> (2015); Ávila-Nájera <i>et al.</i> (2018)                          |
| Ocelot<br>( <i>Leopardus pardalis</i> )          | Rodents ( <i>Rodentia</i> ), Central American Agouti* ( <i>Dasyprocta punctata</i> ), Tamandua ( <i>Tamandua mexicana</i> ), Armadillo* ( <i>Dasybus novemcinctus</i> ), Raccoon ( <i>Procyon lotor</i> ), Coati ( <i>Nasua narica</i> ), Collared Peccary ( <i>Pecari tajacu</i> ), Opossums ( <i>Didelphidae</i> ), Tayra ( <i>Eira barbara</i> ), Common Gray Four-eyed Opossum ( <i>Philander opossum</i> ), Dice's Cottontail ( <i>Sylvilagus dicei</i> ), Paca ( <i>Cuniculus paca</i> ), Central American Red Brocket Deer ( <i>Mazama temama</i> )                                                                                                                                                             | Moreno <i>et al.</i> (2006); Abreu <i>et al.</i> (2008); Bianchi <i>et al.</i> (2010); Silva-Pereira <i>et al.</i> (2011)                                                                                                                                                                                                                                                                                                 |
| Coyote<br>( <i>Canis latrans</i> )               | Dice's Cottontail ( <i>Sylvilagus dicei</i> ), Armadillo ( <i>Dasybus novemcinctus</i> ), Central American Red Brocket Deer ( <i>Mazama temama</i> ), Collared Peccary ( <i>Pecari tajacu</i> ), White-tailed Deer ( <i>Odocoileus virginianus</i> ), Coati ( <i>Nasua narica</i> )                                                                                                                                                                                                                                                                                                                                                                                                                                    | Aranda <i>et al.</i> (1995); Wainwright (2007); Hidalgo-Mihart <i>et al.</i> (2009); Cruz-Espinoza <i>et al.</i> (2010); Martínez-Vázquez <i>et al.</i> (2010); Grajales-Tam & González-Romero (2014)                                                                                                                                                                                                                     |
| Tayra<br>( <i>Eira barbara</i> )                 | Rodents ( <i>Rodentia</i> ), Paca ( <i>Cuniculus paca</i> ), Central American Agouti ( <i>Dasyprocta punctata</i> ), Opossums ( <i>Didelphidae</i> ), Dice's Cottontail ( <i>Sylvilagus dicei</i> ), Coati ( <i>Nasua narica</i> )                                                                                                                                                                                                                                                                                                                                                                                                                                                                                     | Burger & Gochfeld (1992); Wainwright (2002); Reid (2009); Cuarón <i>et al.</i> (2016)                                                                                                                                                                                                                                                                                                                                     |
| Jaguarundi<br>( <i>Herpailurus yaguarundi</i> )  | Rodents* ( <i>Rodentia</i> ), Opossums ( <i>Didelphidae</i> ), Four-eyed Opossum ( <i>Philander opossum</i> ), Paca ( <i>Cuniculus paca</i> ), Central American Agouti ( <i>Dasyprocta punctata</i> ), Central American Red Brocket Deer ( <i>Mazama temama</i> )                                                                                                                                                                                                                                                                                                                                                                                                                                                      | Bianchi <i>et al.</i> (2011); Silva-Pereira <i>et al.</i> (2011); Giordano (2016); Rinaldi <i>et al.</i> (2015)                                                                                                                                                                                                                                                                                                           |
| Margay<br>( <i>Leopardus wiedii</i> )            | Rodents* ( <i>Rodentia</i> ), Opossums ( <i>Didelphidae</i> ), Four-eyed Opossum ( <i>Philander opossum</i> ), Central American Agouti ( <i>Dasyprocta punctata</i> ), Dice's Cottontail ( <i>Sylvilagus dicei</i> ), White-tailed Deer ( <i>Odocoileus virginianus</i> )                                                                                                                                                                                                                                                                                                                                                                                                                                              | Bianchi <i>et al.</i> (2011); Rinaldi <i>et al.</i> (2015); Seibert <i>et al.</i> (2015)                                                                                                                                                                                                                                                                                                                                  |
| Oncilla<br>( <i>Leopardus tigrinus oncilla</i> ) | Rodents* ( <i>Rodentia</i> ), Opossums* ( <i>Didelphidae</i> ), Four-eyed Opossum ( <i>Philander opossum</i> ), Paca ( <i>Cuniculus paca</i> ), Dice's Cottontail ( <i>Sylvilagus dicei</i> ), Coati ( <i>Nasua narica</i> )                                                                                                                                                                                                                                                                                                                                                                                                                                                                                           | Tortato & de Oliveira (2005); Rocha-Mendes <i>et al.</i> (2010); Silva-Pereira <i>et al.</i> (2011); Rinaldi <i>et al.</i> (2015); Seibert <i>et al.</i> (2015);                                                                                                                                                                                                                                                          |

## LITERATURE CITED FROM SUPPLEMENTARY DATA SD2

- ABREU, K. C., R. F. MORO-RÍOS, J. E. SILVA-PEREIRA, J. M. D. MIRANDA, E. F. JABLONSKI, AND F. C. PASSOS. 2008. Feeding habits of ocelot (*Leopardus pardalis*) in Southern Brazil. *Mammalian Biology* 73:407-411. doi:10.1016/j.mambio.2007.07.004
- ARANDA, M., AND V. SÁNCHEZ-CORDERO. 1996. Prey spectra of jaguar (*Panthera onca*) and puma (*Puma concolor*) in tropical forests of Mexico. *Studies on Neotropical Fauna and Environment* 31:65-67. 10.1076/snfe.31.2.65.13334.
- ARANDA, M., N. LÓPEZ-RIVERA, AND L. LÓPEZ-DE-BUEN. 1995. Hábitos alimentarios del coyote (*Canis latrans*) en la Sierra del Ajusco, México. [Food habits of the coyote (*Canis latrans*) in the Sierra de Ajusco, Mexico.] *Acta Zoológica Mexicana* 65:89-99.
- ARROYO-ARCE, S., I. THOMSON, E. HARRISON, S. WILMOTT, AND G. BAKER. 2017. First record of jaguar (*Panthera onca*) predation on a loggerhead sea turtle (*Caretta caretta*) in Tortuguero National Park, Costa Rica. *Herpetology Notes* 10:17-18.
- ÁVILA-NÁJERA, D. M., F. PALOMARES, C. CHÁVEZ, B. TIGAR, AND G. D. MENDOZA. 2018. Jaguar (*Panthera onca*) and puma (*Puma concolor*) diets in Quintana Roo, Mexico. *Animal Biodiversity and Conservation* 41:257-266. 10.32800/abc.2018.41.0257.
- BURGER, J. AND M. GOCHFELD. 1992. Effect of group size on vigilance while drinking in the coati, *Nasua narica* in Costa Rica. *Animal Behaviour* 44:1053-1057. doi.org/10.1016/S0003-3472(05)80317-3
- CRUZ-ESPINOZA, A., G. E. GONZÁLEZ PÉREZ, AND A. SANTOS-MORENO. 2010. Dieta del coyote en Ixtepeji, Sierra Madre de Oaxaca, México. [Coyote diet in Ixtepeji, Sierra Madre de Oaxaca, Mexico.] *Naturaleza y Desarrollo* 8:33-45.
- CUARÓN, A. D., F. REID, K. HELGEN, AND J. F. GONZÁLEZ-MAYA. 2016. Eira barbara. The IUCN Red List of Threatened Species 2016: e.T41644A45212151.
- DE CASSIA BIANCHI, R., S. L. MENDES, AND P. DE MARCO JÚNIOR. 2010. Food habits of the ocelot, *Leopardus pardalis*, in two areas in southeast Brazil. *Studies on Neotropical Fauna and Environment* 45:111-119. doi:10.1080/01650521.2010.514791
- DE CASSIA BIANCHI, R., A. R. ROSA, A. GATTI, AND S. L. MENDES. 2011. Diet of margay (*Leopardus wiedii*) and jaguarundi (*Puma yagouaroundi*) in Atlantic Rainforest Brazil. *Zoologia* 28: 127-132. doi:10.1590/S1984-46702011000100018
- FOSTER, R. J., B. J. HARMSSEN, B. VALDES, B., C. POMILLA, AND C. P. DONCASTER. 2010. Food habits of sympatric jaguars and pumas across a gradient of human disturbance. *Journal of Zoology* 280:309-318. doi:10.1111/j.1469-7998.2009.00663.x
- GARLA, R. C., E. Z. F. SETZ, AND N. GOBBI. 2001. Jaguar (*Panthera onca*) food habits in Atlantic Rain Forest of Southeastern Brazil. *Biotropica* 33:691-696. 10.1111/j.1744-7429.2001.tb00226.x.
- GIORDANO, A. J. 2016. Ecology and status of the jaguarundi *Puma yagouaroundi*: a synthesis of existing knowledge. *Mammal Review* 46:30-43. doi:10.1111/mam.12051
- GÓMEZ-ORTIZ, Y., AND O. MONROY-VILCHIS. 2013. Feeding ecology of puma *Puma concolor* in Mexican montane forests with comments about jaguar *Panthera onca*. *Wildlife Biology* 19:179-187. doi: 10.2981/12-092
- GÓMEZ-ORTIZ, Y., O. MONROY-VILCHIS, V. FAJARDO, G. D. MENDOZA, AND V. URIOS. 2011. Is food quality important for carnivores? The case of *Puma concolor*. *Animal Biology* 61:277-288. doi:10.1163/157075511X584227
- GRAJALES-TAM, K. M., AND A. GONZÁLEZ-ROMERO. 2014. Determinación de la dieta estacional del coyote (*Canis latrans*) en la región norte de la Reserva de la Biosfera Mapimí, México. [Determination of the seasonal diet of the coyote (*Canis latrans*) in the northern region of the Mapimí Biosphere Reserve, Mexico.] *Revista Mexicana de Biodiversidad* 85:553-564. doi.org/10.7550/rmb.35226
- HERNÁNDEZ-SAINTMARTÍN, A. D., O. C. ROSAS-ROSAS, J. PALACIO-NÚÑEZ, L. A. TARANGO-ARAMBULA, F. CLEMENTE-SÁNCHEZ, AND A. L. HOOGESTIJN. 2015. Food Habits of jaguar and puma in a protected area and adjacent fragmented landscape of northeastern Mexico. *Natural Areas Journal* 35:308-317. doi.org/10.3375/043.035.0213
- HIDALGO-MIHART, M. G., L. CANTÚ-SALAZAR, S. E. CARRILLO-PERCASTEGUI, AND C. A. LOPEZ-GONZALEZ. 2009. Daily activity patterns of coyotes (*Canis latrans*) in a tropical deciduous forest of western Mexico. *Studies on Neotropical Fauna and Environment* 44:77-82. doi: 10.1080/01650520902941234

- MARTÍNEZ-VÁZQUEZ, J., R. M. GONZÁLEZ-MONROY, AND D. DÍAZ-DÍAZ. 2010. Hábitos alimentarios del coyote en el parque nacional Pico de Orizaba. *Therya* 1:145-154. doi:10.12933/therya-10-4
- MEDELLÍN, R. A., C. CHETKIEWICZ, A. RABINOWITZ, K. H. REDFORD, J. G. ROBINSON, E. SANDERSON, AND A. TABER (eds.). 2002. Jaguares en el nuevo milenio: una evaluación de su estado, detección de prioridades y recomendaciones para la conservación de los jaguares en América. [Jaguars in the new millennium: an assessment of their status, identification of priorities and recommendations for the conservation of jaguars in America.] Universidad Nacional Autónoma de México - Wildlife Conservation Society, México.
- MONROY-VILCHIS, O., Y. GÓMEZ-ORTIZ, M. JANCZUR, AND V. URIOS. 2009. Food niche of *Puma concolor* in central Mexico. *Wildlife Biology* 15:97-105. doi: 10.2981/07-054.
- MORENO, R. S., R. W. KAYS, AND R. SAMUDIO. 2006. Competitive release in diets of ocelot (*Leopardus pardalis*) and puma (*Puma concolor*) after jaguar (*Panthera onca*) decline. *Journal of Mammalogy* 87:808-816. doi.org/10.1644/05-MAMM-A-360R2.1
- NOVACK, A. J., M. B. MAIN, M. E. SUNQUIST, AND R. F. LABISKY. 2005. Foraging ecology of jaguar (*Panthera onca*) and puma (*Puma concolor*) in hunted and non-hunted sites within the Maya Biosphere Reserve, Guatemala. *Journal of Zoology* 267:167-178. doi:10.1017/S0952836905007338
- OLIVEIRA, T. 2002. Comparative feeding ecology of jaguar and puma in the Neotropics. Pp. 265-288 in *El Jaguar en el Nuevo Milenio*. (R. A. Medellín et al., eds.). Universidad Nacional Autónoma de México, Wildlife Conservation Society, México.
- REID, F.A. 2009. *A Field Guide to the Mammals of Central America and Southeast Mexico*, 2nd ed. Oxford University Press: New York.
- RINALDI, A. R., F. H. RODRIGUEZ, A. LUIZ DE CARVALHO, AND F. DE CAMARGO PASSOS. 2015. Feeding of small Neotropical felids (Felidae: Carnivora) and trophic niche overlap in anthropized mosaic landscape of south Brazil. *Biotemas* 28:155-168. doi: 10.5007/2175-7925.2015v28n4p155
- ROCHA-MENDES, R., S. B. MIKICH, J. QUADROS, AND W. A. PEDRO. 2010. Feeding ecology of carnivores (Mammalia, Carnivora) in Atlantic Forest remnants, southern Brazil. *Biota Neotropica* 10:21-30. 10.1590/S1676-06032010000400001
- RUEDA, P., G. D. MENDOZA, D. MARTÍNEZ, AND O. C. ROSAS-ROSAS. 2013. Determination of the jaguar (*Panthera onca*) and puma (*Puma concolor*) diet in a tropical forest in San Luis Potosi, Mexico. *Journal of Applied Animal Research* 41:484-489. doi: 10.1080/09712119.2013.787362
- SCOGNAMILLO, D., I. E. MAXIT, M. SUNQUIST, AND J. POLISAR. 2003. Coexistence of jaguar (*Panthera onca*) and puma (*Puma concolor*) in a mosaic landscape in the Venezuelan llanos. *Journal of Zoology* 259:269-279. doi:10.1017/S0952836902003230
- SEIBERT, J. B., D. DE OLIVEIRA MOREIRA, S. L. MENDES, AND A. GATTI. 2015. Diet of two sympatric felids (*Leopardus guttulus* and *Leopardus wiedii*) in a remnant of Atlantic forest, in the montane region of Espírito Santo, southeastern Brazil. *Boletim do Museu de Biologia Mello Leitão (N. Sér.)* 37:193-200.
- SILVA-PEREIRA, J. E., R. F. MORO-RÍOS, D. R. BILSKI, AND F. C. PASSOS. 2011. Diets of three sympatric Neotropical small cats: food niche overlap and interspecies differences in prey consumption. *Mammalian Biology* 76:308-312. doi: 10.1016/j.mambio.2010.09.001.
- TORTATO, M. A., AND T. G. DE OLIVEIRA. 2005. Ecology of the oncilla (*Leopardus tigrinus*) at Serra do Tabuleiro State Park, southern Brazil. *CAT News* 42:28-30.
- WAINWRIGHT, M. 2007. *The Mammals of Costa Rica: A Natural History and Field Guide*. Zona Tropical: London.
- WECKEL, M., W. GIULIANO, AND S. SILVER. 2006a. Cockscomb revisited: jaguar diet in the Cockscomb Basin Wildlife Sanctuary, Belize. *Biotropica* 38:687-690. doi:10.1111/j.1744-7429.2006.00190.x.
- WECKEL, M., W. GIULIANO, AND S. SILVER. 2006b. Jaguar (*Panthera onca*) feeding ecology: distribution of predator and prey through time and space. *Journal of Zoology* 270:25-30. doi:10.1111/j.1469-7998.2006.00106.x
