# Supplementary material for: Circadian activity patterns of mammalian predators and prey in Costa Rica
Source: PubMed Central journal article supplement — J Mammal. 2020 Oct 3;101(5):1313–31. doi: 10.1093/jmammal/gyaa103 (PMC7733402; doi:10.1093/jmammal/gyaa103), 2020-10-03
Supplement: gyaa103_suppl_supplementary_data_3.pdf [file gyaa103_suppl_supplementary_data_3.pdf]

**Supplementary Data SD3-1.**— Number of records (N), Overall Relative Abundance Index (RAI), Mean RAI per survey site, and standard deviation (SD) of mean site RAI per species (scientific and common name).

| Species                           | Common Name       | N    | Overall RAI | Mean RAI | SD RAI |
|-----------------------------------|-------------------|------|-------------|----------|--------|
| <i>Panthera onca</i>              | Jaguar            | 106  | 1.77        | 1.43     | 3.50   |
| <i>Puma concolor</i>              | Puma              | 963  | 16.07       | 14.80    | 15.75  |
| <i>Leopardus pardalis</i>         | Ocelot            | 589  | 9.83        | 20.89    | 20.30  |
| <i>Canis latrans</i>              | Coyote            | 2844 | 47.46       | 15.53    | 35.39  |
| <i>Herpailurus yaguarondi</i>     | Jaguarundi        | 26   | 0.43        | 0.43     | 0.63   |
| <i>Eira barbara</i>               | Tayra             | 238  | 3.97        | 6.08     | 3.88   |
| <i>Leopardus wiedii</i>           | Margay            | 27   | 0.45        | 0.67     | 0.65   |
| <i>Leopardus tigrinus oncilla</i> | Oncilla           | 197  | 3.29        | 2.96     | 2.89   |
| <i>Cebus capucinus</i>            | Capuchin          | 52   | 0.87        | 1.82     | 5.48   |
| <i>Coendou mexicanus</i>          | Porcupine         | 69   | 1.15        | 0.55     | 0.88   |
| <i>Conepatus semistriatus</i>     | Skunk             | 247  | 4.12        | 4.33     | 4.26   |
| <i>Cuniculus paca</i>             | Paca              | 1853 | 30.93       | 56.71    | 86.22  |
| <i>Dasyprocta punctata</i>        | Agouti            | 2314 | 38.62       | 132.04   | 247.23 |
| <i>Dasybus novemcinctus</i>       | Armadillo         | 313  | 5.22        | 10.82    | 13.90  |
| <i>Didelphis marsupialis</i>      | Common Opossum    | 745  | 12.43       | 26.75    | 55.25  |
| <i>Mazama temama</i>              | Brocket Deer      | 648  | 10.81       | 7.51     | 9.24   |
| <i>Nasua narica</i>               | Coati             | 1180 | 19.69       | 31.69    | 51.50  |
| <i>Odocoileus virginianus</i>     | White-tailed Deer | 333  | 5.56        | 11.74    | 33.15  |
| <i>Pecari tajacu</i>              | Collared Peccary  | 1668 | 27.84       | 47.10    | 64.89  |
| <i>Philander opossum</i>          | Four-eyed Opossum | 155  | 2.59        | 8.45     | 12.37  |
| <i>Procyon lotor</i>              | Raccoon           | 486  | 8.11        | 8.95     | 19.86  |
| <i>Sylvilagus dicei</i>           | Dice's Cottontail | 1300 | 21.70       | 11.65    | 20.67  |
| <i>Tamandua mexicana</i>          | Tamandua          | 123  | 2.05        | 6.85     | 10.47  |
| <i>Tapirus bairdii</i>            | Baird's Tapir     | 1707 | 28.49       | 17.55    | 26.81  |

**Supplementary Data SD3-2.**— Number of records (N), camera trap days, Overall Relative Abundance Index (RAI), mean RAI per survey site, and standard deviation (SD) of mean site RAI per species (scientific and common name) for each site.

| Species                | Common Name | Site           | N    | Camera Days | Overall RAI | Mean RAI | SD RAI |
|------------------------|-------------|----------------|------|-------------|-------------|----------|--------|
| Panthera onca          | Jaguar      | ASBC           | 0    | 3978        | 0.00        | 0.00     | 0.00   |
| Panthera onca          | Jaguar      | Bosque de Agua | 0    | 606         | 0.00        | 0.00     | 0.00   |
| Panthera onca          | Jaguar      | Cabo Blanco    | 0    | 2041        | 0.00        | 0.00     | 0.00   |
| Panthera onca          | Jaguar      | Chirripo       | 7    | 6658        | 1.05        | 0.08     | 0.65   |
| Panthera onca          | Jaguar      | Copal          | 1    | 707         | 1.41        | 0.01     | 0.14   |
| Panthera onca          | Jaguar      | Marta          | 1    | 1733        | 0.58        | 0.01     | 0.13   |
| Panthera onca          | Jaguar      | Osa Campanario | 2    | 1585        | 1.26        | 0.05     | 0.48   |
| Panthera onca          | Jaguar      | PILA           | 89   | 7164        | 12.42       | 1.30     | 7.03   |
| Panthera onca          | Jaguar      | PN Carara      | 0    | 653         | 0.00        | 0.00     | 0.00   |
| Panthera onca          | Jaguar      | PNLC           | 0    | 4820        | 0.00        | 0.00     | 0.00   |
| Panthera onca          | Jaguar      | Savegre Valley | 4    | 20355       | 0.20        | 0.06     | 0.66   |
| Panthera onca          | Jaguar      | Tapanti        | 2    | 9619        | 0.21        | 0.03     | 0.30   |
| Puma concolor          | Puma        | ASBC           | 47   | 3978        | 11.81       | 0.56     | 3.60   |
| Puma concolor          | Puma        | Bosque de Agua | 0    | 606         | 0.00        | 0.00     | 0.00   |
| Puma concolor          | Puma        | Cabo Blanco    | 0    | 2041        | 0.00        | 0.00     | 0.00   |
| Puma concolor          | Puma        | Chirripo       | 53   | 6658        | 7.96        | 0.59     | 3.08   |
| Puma concolor          | Puma        | Copal          | 18   | 707         | 25.46       | 0.26     | 2.52   |
| Puma concolor          | Puma        | Marta          | 8    | 1733        | 4.62        | 0.13     | 1.35   |
| Puma concolor          | Puma        | Osa Campanario | 34   | 1585        | 21.45       | 0.97     | 6.13   |
| Puma concolor          | Puma        | PILA           | 91   | 7164        | 12.70       | 1.47     | 7.84   |
| Puma concolor          | Puma        | PN Carara      | 6    | 653         | 9.19        | 0.26     | 2.81   |
| Puma concolor          | Puma        | PNLC           | 282  | 4820        | 58.51       | 1.45     | 9.69   |
| Puma concolor          | Puma        | Savegre Valley | 331  | 20355       | 16.26       | 4.46     | 10.36  |
| Puma concolor          | Puma        | Tapanti        | 93   | 9619        | 9.67        | 1.89     | 7.99   |
| Leopardus pardalis     | Ocelot      | ASBC           | 47   | 3978        | 11.81       | 0.71     | 4.80   |
| Leopardus pardalis     | Ocelot      | Bosque de Agua | 2    | 606         | 3.30        | 0.25     | 2.69   |
| Leopardus pardalis     | Ocelot      | Cabo Blanco    | 33   | 2041        | 16.17       | 0.48     | 2.92   |
| Leopardus pardalis     | Ocelot      | Chirripo       | 4    | 6658        | 0.60        | 0.03     | 0.32   |
| Leopardus pardalis     | Ocelot      | Copal          | 38   | 707         | 53.75       | 0.49     | 5.00   |
| Leopardus pardalis     | Ocelot      | Marta          | 89   | 1733        | 51.36       | 1.32     | 9.41   |
| Leopardus pardalis     | Ocelot      | Osa Campanario | 45   | 1585        | 28.39       | 1.08     | 6.53   |
| Leopardus pardalis     | Ocelot      | PILA           | 40   | 7164        | 5.58        | 0.41     | 3.03   |
| Leopardus pardalis     | Ocelot      | PN Carara      | 20   | 653         | 30.63       | 0.58     | 4.48   |
| Leopardus pardalis     | Ocelot      | PNLC           | 218  | 4820        | 45.23       | 1.10     | 7.91   |
| Leopardus pardalis     | Ocelot      | Savegre Valley | 31   | 20355       | 1.52        | 0.54     | 3.77   |
| Leopardus pardalis     | Ocelot      | Tapanti        | 22   | 9619        | 2.29        | 0.36     | 2.87   |
| Canis latrans          | Coyote      | ASBC           | 33   | 3978        | 8.30        | 0.56     | 3.53   |
| Canis latrans          | Coyote      | Bosque de Agua | 0    | 606         | 0.00        | 0.00     | 0.00   |
| Canis latrans          | Coyote      | Cabo Blanco    | 29   | 2041        | 14.21       | 0.37     | 2.56   |
| Canis latrans          | Coyote      | Chirripo       | 190  | 6658        | 28.54       | 2.40     | 14.60  |
| Canis latrans          | Coyote      | Copal          | 0    | 707         | 0.00        | 0.00     | 0.00   |
| Canis latrans          | Coyote      | Marta          | 3    | 1733        | 1.73        | 0.06     | 0.78   |
| Canis latrans          | Coyote      | Osa Campanario | 0    | 1585        | 0.00        | 0.00     | 0.00   |
| Canis latrans          | Coyote      | PILA           | 17   | 7164        | 2.37        | 0.19     | 0.98   |
| Canis latrans          | Coyote      | PN Carara      | 2    | 653         | 3.06        | 0.09     | 0.95   |
| Canis latrans          | Coyote      | PNLC           | 2    | 4820        | 0.41        | 0.01     | 0.10   |
| Canis latrans          | Coyote      | Savegre Valley | 2539 | 20355       | 124.74      | 49.70    | 127.50 |
| Canis latrans          | Coyote      | Tapanti        | 29   | 9619        | 3.01        | 0.48     | 3.66   |
| Herpailurus yaguarondi | Jaguarundi  | ASBC           | 5    | 3978        | 1.26        | 0.04     | 0.30   |
| Herpailurus yaguarondi | Jaguarundi  | Bosque de Agua | 0    | 606         | 0.00        | 0.00     | 0.00   |
| Herpailurus yaguarondi | Jaguarundi  | Cabo Blanco    | 4    | 2041        | 1.96        | 0.04     | 0.60   |
| Herpailurus yaguarondi | Jaguarundi  | Chirripo       | 0    | 6658        | 0.00        | 0.00     | 0.00   |
| Herpailurus yaguarondi | Jaguarundi  | Copal          | 0    | 707         | 0.00        | 0.00     | 0.00   |
| Herpailurus yaguarondi | Jaguarundi  | Marta          | 0    | 1733        | 0.00        | 0.00     | 0.00   |
| Herpailurus yaguarondi | Jaguarundi  | Osa Campanario | 1    | 1585        | 0.63        | 0.02     | 0.28   |
| Herpailurus yaguarondi | Jaguarundi  | PILA           | 1    | 7164        | 0.14        | 0.02     | 0.25   |

| Species                       | Common Name | Site           | N  | Camera Days | Overall RAI | Mean RAI | SD RAI |
|-------------------------------|-------------|----------------|----|-------------|-------------|----------|--------|
| <i>Herpailurus yaguarondi</i> | Jaguarundi  | PN Carara      | 0  | 653         | 0.00        | 0.00     | 0.00   |
| <i>Herpailurus yaguarondi</i> | Jaguarundi  | PNLC           | 0  | 4820        | 0.00        | 0.00     | 0.00   |
| <i>Herpailurus yaguarondi</i> | Jaguarundi  | Savegre Valley | 7  | 20355       | 0.34        | 0.18     | 1.62   |
| <i>Herpailurus yaguarondi</i> | Jaguarundi  | Tapanti        | 8  | 9619        | 0.83        | 0.11     | 0.81   |
| <i>Eira barbara</i>           | Tayra       | ASBC           | 34 | 3978        | 8.55        | 0.25     | 2.54   |
| <i>Eira barbara</i>           | Tayra       | Bosque de Agua | 6  | 606         | 9.90        | 0.44     | 6.11   |
| <i>Eira barbara</i>           | Tayra       | Cabo Blanco    | 21 | 2041        | 10.29       | 0.30     | 2.25   |
| <i>Eira barbara</i>           | Tayra       | Chirripo       | 15 | 6658        | 2.25        | 0.33     | 1.96   |
| <i>Eira barbara</i>           | Tayra       | Copal          | 3  | 707         | 4.24        | 0.07     | 0.84   |
| <i>Eira barbara</i>           | Tayra       | Marta          | 14 | 1733        | 8.08        | 0.25     | 2.62   |
| <i>Eira barbara</i>           | Tayra       | Osa Campanario | 16 | 1585        | 10.09       | 0.43     | 2.89   |
| <i>Eira barbara</i>           | Tayra       | PILA           | 16 | 7164        | 2.23        | 0.19     | 0.99   |
| <i>Eira barbara</i>           | Tayra       | PN Carara      | 2  | 653         | 3.06        | 0.06     | 0.60   |
| <i>Eira barbara</i>           | Tayra       | PNLC           | 53 | 4820        | 11.00       | 0.25     | 2.08   |
| <i>Eira barbara</i>           | Tayra       | Savegre Valley | 50 | 20355       | 2.46        | 1.04     | 4.84   |
| <i>Eira barbara</i>           | Tayra       | Tapanti        | 8  | 9619        | 0.83        | 0.12     | 0.87   |
| <i>Leopardus wiedii</i>       | Margay      | ASBC           | 0  | 3978        | 0.00        | 0.00     | 0.00   |
| <i>Leopardus wiedii</i>       | Margay      | Bosque de Agua | 0  | 606         | 0.00        | 0.00     | 0.00   |
| <i>Leopardus wiedii</i>       | Margay      | Cabo Blanco    | 2  | 2041        | 0.98        | 0.02     | 0.30   |
| <i>Leopardus wiedii</i>       | Margay      | Chirripo       | 7  | 6658        | 1.05        | 0.04     | 0.48   |
| <i>Leopardus wiedii</i>       | Margay      | Copal          | 1  | 707         | 1.41        | 0.01     | 0.14   |
| <i>Leopardus wiedii</i>       | Margay      | Marta          | 2  | 1733        | 1.15        | 0.03     | 0.40   |
| <i>Leopardus wiedii</i>       | Margay      | Osa Campanario | 3  | 1585        | 1.89        | 0.06     | 0.50   |
| <i>Leopardus wiedii</i>       | Margay      | PILA           | 3  | 7164        | 0.42        | 0.06     | 0.69   |
| <i>Leopardus wiedii</i>       | Margay      | PN Carara      | 0  | 653         | 0.00        | 0.00     | 0.00   |
| <i>Leopardus wiedii</i>       | Margay      | PNLC           | 4  | 4820        | 0.83        | 0.02     | 0.19   |
| <i>Leopardus wiedii</i>       | Margay      | Savegre Valley | 5  | 20355       | 0.25        | 0.14     | 1.50   |
| <i>Leopardus wiedii</i>       | Margay      | Tapanti        | 0  | 9619        | 0.00        | 0.00     | 0.00   |
| <i>L. tigrinus oncilla</i>    | Oncilla     | ASBC           | 4  | 3978        | 1.01        | 0.06     | 0.67   |
| <i>L. tigrinus oncilla</i>    | Oncilla     | Bosque de Agua | 2  | 606         | 3.30        | 0.36     | 4.99   |
| <i>L. tigrinus oncilla</i>    | Oncilla     | Cabo Blanco    | 9  | 2041        | 4.41        | 0.09     | 0.97   |
| <i>L. tigrinus oncilla</i>    | Oncilla     | Chirripo       | 18 | 6658        | 2.70        | 0.22     | 1.52   |
| <i>L. tigrinus oncilla</i>    | Oncilla     | Copal          | 6  | 707         | 8.49        | 0.08     | 0.79   |
| <i>L. tigrinus oncilla</i>    | Oncilla     | Marta          | 1  | 1733        | 0.58        | 0.01     | 0.13   |
| <i>L. tigrinus oncilla</i>    | Oncilla     | Osa Campanario | 1  | 1585        | 0.63        | 0.02     | 0.31   |
| <i>L. tigrinus oncilla</i>    | Oncilla     | PILA           | 59 | 7164        | 8.24        | 0.68     | 3.23   |
| <i>L. tigrinus oncilla</i>    | Oncilla     | PN Carara      | 0  | 653         | 0.00        | 0.00     | 0.00   |
| <i>L. tigrinus oncilla</i>    | Oncilla     | PNLC           | 3  | 4820        | 0.62        | 0.01     | 0.15   |
| <i>L. tigrinus oncilla</i>    | Oncilla     | Savegre Valley | 77 | 20355       | 3.78        | 1.38     | 5.60   |
| <i>L. tigrinus oncilla</i>    | Oncilla     | Tapanti        | 17 | 9619        | 1.77        | 0.19     | 1.09   |
| <i>Cebus capucinus</i>        | Capuchin    | ASBC           | 1  | 3978        | 0.25        | 0.01     | 0.12   |
| <i>Cebus capucinus</i>        | Capuchin    | Bosque de Agua | 0  | 606         | 0.00        | 0.00     | 0.00   |
| <i>Cebus capucinus</i>        | Capuchin    | Cabo Blanco    | 39 | 2041        | 19.11       | 0.45     | 3.39   |
| <i>Cebus capucinus</i>        | Capuchin    | Chirripo       | 0  | 6658        | 0.00        | 0.00     | 0.00   |
| <i>Cebus capucinus</i>        | Capuchin    | Copal          | 0  | 707         | 0.00        | 0.00     | 0.00   |
| <i>Cebus capucinus</i>        | Capuchin    | Marta          | 0  | 1733        | 0.00        | 0.00     | 0.00   |
| <i>Cebus capucinus</i>        | Capuchin    | Osa Campanario | 0  | 1585        | 0.00        | 0.00     | 0.00   |
| <i>Cebus capucinus</i>        | Capuchin    | PILA           | 1  | 7164        | 0.14        | 0.01     | 0.10   |
| <i>Cebus capucinus</i>        | Capuchin    | PN Carara      | 0  | 653         | 0.00        | 0.00     | 0.00   |
| <i>Cebus capucinus</i>        | Capuchin    | PNLC           | 11 | 4820        | 2.28        | 0.06     | 0.51   |
| <i>Cebus capucinus</i>        | Capuchin    | Savegre Valley | 0  | 20355       | 0.00        | 0.00     | 0.00   |
| <i>Cebus capucinus</i>        | Capuchin    | Tapanti        | 0  | 9619        | 0.00        | 0.00     | 0.00   |
| <i>Coendou mexicanus</i>      | Porcupine   | ASBC           | 6  | 3978        | 1.51        | 0.07     | 0.69   |
| <i>Coendou mexicanus</i>      | Porcupine   | Bosque de Agua | 0  | 606         | 0.00        | 0.00     | 0.00   |
| <i>Coendou mexicanus</i>      | Porcupine   | Cabo Blanco    | 0  | 2041        | 0.00        | 0.00     | 0.00   |
| <i>Coendou mexicanus</i>      | Porcupine   | Chirripo       | 1  | 6658        | 0.15        | 0.01     | 0.18   |
| <i>Coendou mexicanus</i>      | Porcupine   | Copal          | 0  | 707         | 0.00        | 0.00     | 0.00   |
| <i>Coendou mexicanus</i>      | Porcupine   | Marta          | 0  | 1733        | 0.00        | 0.00     | 0.00   |

| Species                | Common Name    | Site           | N   | Camera Days | Overall RAI | Mean RAI | SD RAI |
|------------------------|----------------|----------------|-----|-------------|-------------|----------|--------|
| Coendou mexicanus      | Porcupine      | Osa Campanario | 0   | 1585        | 0.00        | 0.00     | 0.00   |
| Coendou mexicanus      | Porcupine      | PILA           | 17  | 7164        | 2.37        | 0.31     | 4.32   |
| Coendou mexicanus      | Porcupine      | PN Carara      | 0   | 653         | 0.00        | 0.00     | 0.00   |
| Coendou mexicanus      | Porcupine      | PNLC           | 1   | 4820        | 0.21        | 0.01     | 0.08   |
| Coendou mexicanus      | Porcupine      | Savegre Valley | 41  | 20355       | 2.01        | 1.73     | 17.44  |
| Coendou mexicanus      | Porcupine      | Tapanti        | 3   | 9619        | 0.31        | 0.04     | 0.53   |
|                        |                |                |     |             |             |          |        |
| Conepatus semistriatus | Skunk          | ASBC           | 25  | 3978        | 6.28        | 0.33     | 2.35   |
| Conepatus semistriatus | Skunk          | Bosque de Agua | 0   | 606         | 0.00        | 0.00     | 0.00   |
| Conepatus semistriatus | Skunk          | Cabo Blanco    | 3   | 2041        | 1.47        | 0.06     | 0.50   |
| Conepatus semistriatus | Skunk          | Chirripo       | 24  | 6658        | 3.60        | 0.54     | 3.39   |
| Conepatus semistriatus | Skunk          | Copal          | 6   | 707         | 8.49        | 0.10     | 0.99   |
| Conepatus semistriatus | Skunk          | Marta          | 0   | 1733        | 0.00        | 0.00     | 0.00   |
| Conepatus semistriatus | Skunk          | Osa Campanario | 0   | 1585        | 0.00        | 0.00     | 0.00   |
| Conepatus semistriatus | Skunk          | PILA           | 46  | 7164        | 6.42        | 0.57     | 3.63   |
| Conepatus semistriatus | Skunk          | PN Carara      | 5   | 653         | 7.66        | 0.12     | 1.31   |
| Conepatus semistriatus | Skunk          | PNLC           | 66  | 4820        | 13.69       | 0.32     | 2.56   |
| Conepatus semistriatus | Skunk          | Savegre Valley | 58  | 20355       | 2.85        | 0.41     | 1.93   |
| Conepatus semistriatus | Skunk          | Tapanti        | 14  | 9619        | 1.46        | 0.11     | 0.98   |
|                        |                |                |     |             |             |          |        |
| Cuniculus paca         | Paca           | ASBC           | 24  | 3978        | 6.03        | 0.45     | 3.38   |
| Cuniculus paca         | Paca           | Bosque de Agua | 23  | 606         | 37.95       | 1.41     | 16.48  |
| Cuniculus paca         | Paca           | Cabo Blanco    | 508 | 2041        | 248.90      | 8.50     | 67.97  |
| Cuniculus paca         | Paca           | Chirripo       | 18  | 6658        | 2.70        | 0.20     | 1.96   |
| Cuniculus paca         | Paca           | Copal          | 15  | 707         | 21.22       | 0.17     | 1.95   |
| Cuniculus paca         | Paca           | Marta          | 6   | 1733        | 3.46        | 0.09     | 0.87   |
| Cuniculus paca         | Paca           | Osa Campanario | 0   | 1585        | 0.00        | 0.00     | 0.00   |
| Cuniculus paca         | Paca           | PILA           | 235 | 7164        | 32.80       | 1.75     | 18.73  |
| Cuniculus paca         | Paca           | PN Carara      | 142 | 653         | 217.46      | 4.35     | 44.60  |
| Cuniculus paca         | Paca           | PNLC           | 420 | 4820        | 87.14       | 2.23     | 19.40  |
| Cuniculus paca         | Paca           | Savegre Valley | 459 | 20355       | 22.55       | 7.13     | 39.62  |
| Cuniculus paca         | Paca           | Tapanti        | 3   | 9619        | 0.31        | 0.03     | 0.32   |
|                        |                |                |     |             |             |          |        |
| Dasyprocta punctata    | Agouti         | ASBC           | 338 | 3978        | 84.97       | 3.89     | 21.38  |
| Dasyprocta punctata    | Agouti         | Bosque de Agua | 22  | 606         | 36.30       | 2.20     | 25.25  |
| Dasyprocta punctata    | Agouti         | Cabo Blanco    | 851 | 2041        | 416.95      | 11.99    | 74.56  |
| Dasyprocta punctata    | Agouti         | Chirripo       | 0   | 6658        | 0.00        | 0.00     | 0.00   |
| Dasyprocta punctata    | Agouti         | Copal          | 91  | 707         | 128.71      | 1.22     | 12.13  |
| Dasyprocta punctata    | Agouti         | Marta          | 1   | 1733        | 0.58        | 0.02     | 0.26   |
| Dasyprocta punctata    | Agouti         | Osa Campanario | 0   | 1585        | 0.00        | 0.00     | 0.00   |
| Dasyprocta punctata    | Agouti         | PILA           | 10  | 7164        | 1.40        | 0.08     | 0.63   |
| Dasyprocta punctata    | Agouti         | PN Carara      | 536 | 653         | 820.83      | 14.84    | 151.67 |
| Dasyprocta punctata    | Agouti         | PNLC           | 454 | 4820        | 94.19       | 2.46     | 16.75  |
| Dasyprocta punctata    | Agouti         | Savegre Valley | 11  | 20355       | 0.54        | 0.04     | 0.50   |
| Dasyprocta punctata    | Agouti         | Tapanti        | 0   | 9619        | 0.00        | 0.00     | 0.00   |
|                        |                |                |     |             |             |          |        |
| Dasyplus novemcitus    | Armadillo      | ASBC           | 34  | 3978        | 8.55        | 0.43     | 2.67   |
| Dasyplus novemcitus    | Armadillo      | Bosque de Agua | 2   | 606         | 3.30        | 0.15     | 2.04   |
| Dasyplus novemcitus    | Armadillo      | Cabo Blanco    | 50  | 2041        | 24.50       | 0.61     | 4.34   |
| Dasyplus novemcitus    | Armadillo      | Chirripo       | 1   | 6658        | 0.15        | 0.01     | 0.08   |
| Dasyplus novemcitus    | Armadillo      | Copal          | 1   | 707         | 1.41        | 0.01     | 0.14   |
| Dasyplus novemcitus    | Armadillo      | Marta          | 38  | 1733        | 21.93       | 0.54     | 4.23   |
| Dasyplus novemcitus    | Armadillo      | Osa Campanario | 0   | 1585        | 0.00        | 0.00     | 0.00   |
| Dasyplus novemcitus    | Armadillo      | PILA           | 10  | 7164        | 1.40        | 0.17     | 1.16   |
| Dasyplus novemcitus    | Armadillo      | PN Carara      | 27  | 653         | 41.35       | 1.04     | 10.23  |
| Dasyplus novemcitus    | Armadillo      | PNLC           | 123 | 4820        | 25.52       | 0.61     | 5.13   |
| Dasyplus novemcitus    | Armadillo      | Savegre Valley | 19  | 20355       | 0.93        | 0.52     | 5.85   |
| Dasyplus novemcitus    | Armadillo      | Tapanti        | 8   | 9619        | 0.83        | 0.24     | 2.53   |
|                        |                |                |     |             |             |          |        |
| Didelphis marsupialis  | Common Opossum | ASBC           | 149 | 3978        | 37.46       | 1.93     | 11.95  |
| Didelphis marsupialis  | Common Opossum | Bosque de Agua | 8   | 606         | 13.20       | 1.15     | 14.99  |
| Didelphis marsupialis  | Common Opossum | Cabo Blanco    | 404 | 2041        | 197.94      | 5.38     | 35.44  |
| Didelphis marsupialis  | Common Opossum | Chirripo       | 2   | 6658        | 0.30        | 0.02     | 0.16   |

| Species                | Common Name       | Site           | N   | Camera Days | Overall RAI | Mean RAI | SD RAI |
|------------------------|-------------------|----------------|-----|-------------|-------------|----------|--------|
| Didelphis marsupialis  | Common Opossum    | Copal          | 15  | 707         | 21.22       | 0.41     | 5.38   |
| Didelphis marsupialis  | Common Opossum    | Marta          | 1   | 1733        | 0.58        | 0.02     | 0.26   |
| Didelphis marsupialis  | Common Opossum    | Osa Campanario | 0   | 1585        | 0.00        | 0.00     | 0.00   |
| Didelphis marsupialis  | Common Opossum    | PILA           | 67  | 7164        | 9.35        | 0.52     | 5.25   |
| Didelphis marsupialis  | Common Opossum    | PN Carara      | 18  | 653         | 27.57       | 0.70     | 7.06   |
| Didelphis marsupialis  | Common Opossum    | PNLC           | 50  | 4820        | 10.37       | 0.25     | 1.88   |
| Didelphis marsupialis  | Common Opossum    | Savegre Valley | 3   | 20355       | 0.15        | 0.01     | 0.11   |
| Didelphis marsupialis  | Common Opossum    | Tapanti        | 28  | 9619        | 2.91        | 0.16     | 1.36   |
| Mazama temama          | Brocket Deer      | ASBC           | 7   | 3978        | 1.76        | 0.11     | 0.73   |
| Mazama temama          | Brocket Deer      | Bosque de Agua | 0   | 606         | 0.00        | 0.00     | 0.00   |
| Mazama temama          | Brocket Deer      | Cabo Blanco    | 29  | 2041        | 14.21       | 0.41     | 3.29   |
| Mazama temama          | Brocket Deer      | Chirripo       | 73  | 6658        | 10.96       | 0.62     | 3.65   |
| Mazama temama          | Brocket Deer      | Copal          | 0   | 707         | 0.00        | 0.00     | 0.00   |
| Mazama temama          | Brocket Deer      | Marta          | 9   | 1733        | 5.19        | 0.12     | 1.02   |
| Mazama temama          | Brocket Deer      | Osa Campanario | 4   | 1585        | 2.52        | 0.09     | 0.85   |
| Mazama temama          | Brocket Deer      | PILA           | 87  | 7164        | 12.14       | 1.57     | 6.86   |
| Mazama temama          | Brocket Deer      | PN Carara      | 3   | 653         | 4.59        | 0.15     | 1.79   |
| Mazama temama          | Brocket Deer      | PNLC           | 1   | 4820        | 0.21        | 0.01     | 0.08   |
| Mazama temama          | Brocket Deer      | Savegre Valley | 123 | 20355       | 6.04        | 2.11     | 11.81  |
| Mazama temama          | Brocket Deer      | Tapanti        | 312 | 9619        | 32.44       | 5.39     | 27.99  |
| Nasua narica           | Coati             | ASBC           | 25  | 3978        | 6.28        | 0.33     | 2.81   |
| Nasua narica           | Coati             | Bosque de Agua | 21  | 606         | 34.65       | 1.63     | 15.88  |
| Nasua narica           | Coati             | Cabo Blanco    | 380 | 2041        | 186.18      | 4.64     | 32.42  |
| Nasua narica           | Coati             | Chirripo       | 48  | 6658        | 7.21        | 0.70     | 3.63   |
| Nasua narica           | Coati             | Copal          | 17  | 707         | 24.05       | 0.25     | 2.41   |
| Nasua narica           | Coati             | Marta          | 25  | 1733        | 14.43       | 0.38     | 2.69   |
| Nasua narica           | Coati             | Osa Campanario | 7   | 1585        | 4.42        | 0.19     | 1.37   |
| Nasua narica           | Coati             | PILA           | 30  | 7164        | 4.19        | 0.32     | 1.63   |
| Nasua narica           | Coati             | PN Carara      | 8   | 653         | 12.25       | 0.26     | 1.87   |
| Nasua narica           | Coati             | PNLC           | 305 | 4820        | 63.28       | 1.63     | 11.99  |
| Nasua narica           | Coati             | Savegre Valley | 170 | 20355       | 8.35        | 5.14     | 20.10  |
| Nasua narica           | Coati             | Tapanti        | 144 | 9619        | 14.97       | 2.29     | 16.45  |
| Odocoileus virginianus | White-tailed Deer | ASBC           | 10  | 3978        | 2.51        | 0.18     | 1.45   |
| Odocoileus virginianus | White-tailed Deer | Bosque de Agua | 0   | 606         | 0.00        | 0.00     | 0.00   |
| Odocoileus virginianus | White-tailed Deer | Cabo Blanco    | 237 | 2041        | 116.12      | 3.57     | 21.78  |
| Odocoileus virginianus | White-tailed Deer | Chirripo       | 7   | 6658        | 1.05        | 0.13     | 1.23   |
| Odocoileus virginianus | White-tailed Deer | Copal          | 0   | 707         | 0.00        | 0.00     | 0.00   |
| Odocoileus virginianus | White-tailed Deer | Marta          | 0   | 1733        | 0.00        | 0.00     | 0.00   |
| Odocoileus virginianus | White-tailed Deer | Osa Campanario | 0   | 1585        | 0.00        | 0.00     | 0.00   |
| Odocoileus virginianus | White-tailed Deer | PILA           | 2   | 7164        | 0.28        | 0.02     | 0.15   |
| Odocoileus virginianus | White-tailed Deer | PN Carara      | 4   | 653         | 6.13        | 0.14     | 1.14   |
| Odocoileus virginianus | White-tailed Deer | PNLC           | 70  | 4820        | 14.52       | 0.39     | 4.09   |
| Odocoileus virginianus | White-tailed Deer | Savegre Valley | 0   | 20355       | 0.00        | 0.00     | 0.00   |
| Odocoileus virginianus | White-tailed Deer | Tapanti        | 3   | 9619        | 0.31        | 0.08     | 1.06   |
| Pecari tajacu          | Collared Peccary  | ASBC           | 13  | 3978        | 3.27        | 0.11     | 0.84   |
| Pecari tajacu          | Collared Peccary  | Bosque de Agua | 0   | 606         | 0.00        | 0.00     | 0.00   |
| Pecari tajacu          | Collared Peccary  | Cabo Blanco    | 346 | 2041        | 169.52      | 5.98     | 53.77  |
| Pecari tajacu          | Collared Peccary  | Chirripo       | 96  | 6658        | 14.42       | 1.12     | 6.54   |
| Pecari tajacu          | Collared Peccary  | Copal          | 24  | 707         | 33.95       | 0.60     | 7.48   |
| Pecari tajacu          | Collared Peccary  | Marta          | 5   | 1733        | 2.89        | 0.07     | 0.54   |
| Pecari tajacu          | Collared Peccary  | Osa Campanario | 53  | 1585        | 33.44       | 1.52     | 14.14  |
| Pecari tajacu          | Collared Peccary  | PILA           | 24  | 7164        | 3.35        | 0.35     | 1.53   |
| Pecari tajacu          | Collared Peccary  | PN Carara      | 116 | 653         | 177.64      | 4.28     | 37.76  |
| Pecari tajacu          | Collared Peccary  | PNLC           | 472 | 4820        | 97.93       | 2.40     | 16.28  |
| Pecari tajacu          | Collared Peccary  | Savegre Valley | 459 | 20355       | 22.55       | 16.32    | 56.35  |
| Pecari tajacu          | Collared Peccary  | Tapanti        | 60  | 9619        | 6.24        | 2.27     | 13.11  |
| Philander opossum      | Four-eyed Opossum | ASBC           | 49  | 3978        | 12.32       | 0.52     | 3.22   |
| Philander opossum      | Four-eyed Opossum | Bosque de Agua | 10  | 606         | 16.50       | 0.42     | 4.25   |

| Species           | Common Name       | Site           | N   | Camera Days | Overall RAI | Mean RAI | SD RAI |
|-------------------|-------------------|----------------|-----|-------------|-------------|----------|--------|
| Philander opossum | Four-eyed Opossum | Cabo Blanco    | 46  | 2041        | 22.54       | 0.88     | 6.85   |
| Philander opossum | Four-eyed Opossum | Chirripo       | 10  | 6658        | 1.50        | 0.13     | 1.82   |
| Philander opossum | Four-eyed Opossum | Copal          | 28  | 707         | 39.60       | 0.62     | 7.18   |
| Philander opossum | Four-eyed Opossum | Marta          | 7   | 1733        | 4.04        | 0.16     | 2.09   |
| Philander opossum | Four-eyed Opossum | Osa Campanario | 0   | 1585        | 0.00        | 0.00     | 0.00   |
| Philander opossum | Four-eyed Opossum | PILA           | 0   | 7164        | 0.00        | 0.00     | 0.00   |
| Philander opossum | Four-eyed Opossum | PN Carara      | 3   | 653         | 4.59        | 0.08     | 0.79   |
| Philander opossum | Four-eyed Opossum | PNLC           | 1   | 4820        | 0.21        | 0.00     | 0.06   |
| Philander opossum | Four-eyed Opossum | Savegre Valley | 1   | 20355       | 0.05        | 0.00     | 0.05   |
| Philander opossum | Four-eyed Opossum | Tapanti        | 0   | 9619        | 0.00        | 0.00     | 0.00   |
| Procyon lotor     | Raccoon           | ASBC           | 21  | 3978        | 5.28        | 0.39     | 2.34   |
| Procyon lotor     | Raccoon           | Bosque de Agua | 9   | 606         | 14.85       | 0.30     | 4.20   |
| Procyon lotor     | Raccoon           | Cabo Blanco    | 142 | 2041        | 69.57       | 1.54     | 21.32  |
| Procyon lotor     | Raccoon           | Chirripo       | 1   | 6658        | 0.15        | 0.03     | 0.44   |
| Procyon lotor     | Raccoon           | Copal          | 0   | 707         | 0.00        | 0.00     | 0.00   |
| Procyon lotor     | Raccoon           | Marta          | 0   | 1733        | 0.00        | 0.00     | 0.00   |
| Procyon lotor     | Raccoon           | Osa Campanario | 0   | 1585        | 0.00        | 0.00     | 0.00   |
| Procyon lotor     | Raccoon           | PILA           | 9   | 7164        | 1.26        | 0.09     | 0.60   |
| Procyon lotor     | Raccoon           | PN Carara      | 0   | 653         | 0.00        | 0.00     | 0.00   |
| Procyon lotor     | Raccoon           | PNLC           | 7   | 4820        | 1.45        | 0.03     | 0.30   |
| Procyon lotor     | Raccoon           | Savegre Valley | 293 | 20355       | 14.39       | 24.74    | 94.17  |
| Procyon lotor     | Raccoon           | Tapanti        | 4   | 9619        | 0.42        | 0.04     | 0.36   |
| Sylvilagus dicei  | Dice's Cottontail | ASBC           | 2   | 3978        | 0.50        | 0.02     | 0.18   |
| Sylvilagus dicei  | Dice's Cottontail | Bosque de Agua | 0   | 606         | 0.00        | 0.00     | 0.00   |
| Sylvilagus dicei  | Dice's Cottontail | Cabo Blanco    | 0   | 2041        | 0.00        | 0.00     | 0.00   |
| Sylvilagus dicei  | Dice's Cottontail | Chirripo       | 458 | 6658        | 68.79       | 4.27     | 22.69  |
| Sylvilagus dicei  | Dice's Cottontail | Copal          | 1   | 707         | 1.41        | 0.01     | 0.14   |
| Sylvilagus dicei  | Dice's Cottontail | Marta          | 0   | 1733        | 0.00        | 0.00     | 0.00   |
| Sylvilagus dicei  | Dice's Cottontail | Osa Campanario | 0   | 1585        | 0.00        | 0.00     | 0.00   |
| Sylvilagus dicei  | Dice's Cottontail | PILA           | 174 | 7164        | 24.29       | 2.30     | 12.94  |
| Sylvilagus dicei  | Dice's Cottontail | PN Carara      | 0   | 653         | 0.00        | 0.00     | 0.00   |
| Sylvilagus dicei  | Dice's Cottontail | PNLC           | 0   | 4820        | 0.00        | 0.00     | 0.00   |
| Sylvilagus dicei  | Dice's Cottontail | Savegre Valley | 444 | 20355       | 21.81       | 10.13    | 55.37  |
| Sylvilagus dicei  | Dice's Cottontail | Tapanti        | 221 | 9619        | 22.98       | 2.27     | 9.49   |
| Tamandua mexicana | Tamandua          | ASBC           | 7   | 3978        | 1.76        | 0.18     | 2.01   |
| Tamandua mexicana | Tamandua          | Bosque de Agua | 22  | 606         | 36.30       | 0.74     | 9.37   |
| Tamandua mexicana | Tamandua          | Cabo Blanco    | 30  | 2041        | 14.70       | 0.47     | 3.02   |
| Tamandua mexicana | Tamandua          | Chirripo       | 0   | 6658        | 0.00        | 0.00     | 0.00   |
| Tamandua mexicana | Tamandua          | Copal          | 0   | 707         | 0.00        | 0.00     | 0.00   |
| Tamandua mexicana | Tamandua          | Marta          | 10  | 1733        | 5.77        | 0.18     | 1.46   |
| Tamandua mexicana | Tamandua          | Osa Campanario | 17  | 1585        | 10.73       | 0.49     | 3.30   |
| Tamandua mexicana | Tamandua          | PILA           | 0   | 7164        | 0.00        | 0.00     | 0.00   |
| Tamandua mexicana | Tamandua          | PN Carara      | 4   | 653         | 6.13        | 0.09     | 0.88   |
| Tamandua mexicana | Tamandua          | PNLC           | 33  | 4820        | 6.85        | 0.18     | 1.14   |
| Tamandua mexicana | Tamandua          | Savegre Valley | 0   | 20355       | 0.00        | 0.00     | 0.00   |
| Tamandua mexicana | Tamandua          | Tapanti        | 0   | 9619        | 0.00        | 0.00     | 0.00   |
| Tapirus bairdii   | Baird's Tapir     | ASBC           | 1   | 3978        | 0.25        | 0.02     | 0.33   |
| Tapirus bairdii   | Baird's Tapir     | Bosque de Agua | 0   | 606         | 0.00        | 0.00     | 0.00   |
| Tapirus bairdii   | Baird's Tapir     | Cabo Blanco    | 0   | 2041        | 0.00        | 0.00     | 0.00   |
| Tapirus bairdii   | Baird's Tapir     | Chirripo       | 129 | 6658        | 19.38       | 2.60     | 14.01  |
| Tapirus bairdii   | Baird's Tapir     | Copal          | 6   | 707         | 8.49        | 0.06     | 0.82   |
| Tapirus bairdii   | Baird's Tapir     | Marta          | 0   | 1733        | 0.00        | 0.00     | 0.00   |
| Tapirus bairdii   | Baird's Tapir     | Osa Campanario | 51  | 1585        | 32.18       | 1.04     | 7.91   |
| Tapirus bairdii   | Baird's Tapir     | PILA           | 294 | 7164        | 41.04       | 5.07     | 24.42  |
| Tapirus bairdii   | Baird's Tapir     | PN Carara      | 1   | 653         | 1.53        | 0.03     | 0.36   |
| Tapirus bairdii   | Baird's Tapir     | PNLC           | 0   | 4820        | 0.00        | 0.00     | 0.00   |
| Tapirus bairdii   | Baird's Tapir     | Savegre Valley | 358 | 20355       | 17.59       | 4.16     | 17.14  |
| Tapirus bairdii   | Baird's Tapir     | Tapanti        | 867 | 9619        | 90.13       | 11.57    | 37.95  |
