# Supplementary material for: Circadian activity patterns of mammalian predators and prey in Costa Rica
Source: PubMed Central journal article supplement — J Mammal. 2020 Oct 3;101(5):1313–31. doi: 10.1093/jmammal/gyaa103 (PMC7733402; doi:10.1093/jmammal/gyaa103), 2020-10-03
Supplement: gyaa103_suppl_supplementary_data_5.pdf [file gyaa103_suppl_supplementary_data_5.pdf]

Temporal Density

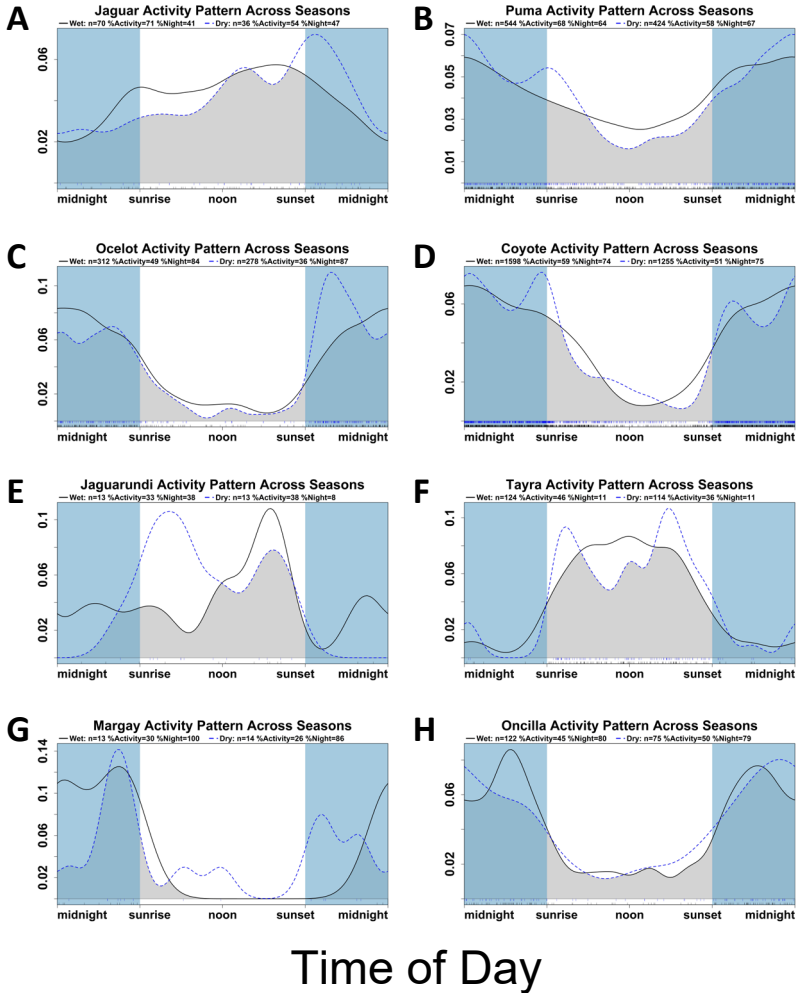

**Supplementary Data SD5-1.** Comparison of circadian activity density between the dry season and wet season for the 8 species of predators in the surveys, based on all survey sites 2010-2019: (A) jaguar, (B) puma, (C) ocelot, (D) coyote, (E) jaguarundi, (F) tayra, (G) margay, and (H) oncilla. Time of day is based on sun time. Sample size of independent records for dry vs. wet season ( $n$ ), percent time active for dry vs. wet season (%Activity), and percent time active at night for dry vs. wet season (%Night) are indicated on the top of each plot frame. Mann-Whitney tests for all survey species revealed no significant influence of season on %Activity ( $n = 24$ ,  $U = 278.5$ ,  $P = 0.85$ ) or %Night ( $n = 24$ ,  $U = 270.0$ ,  $P = 0.72$ ).

Temporal Density

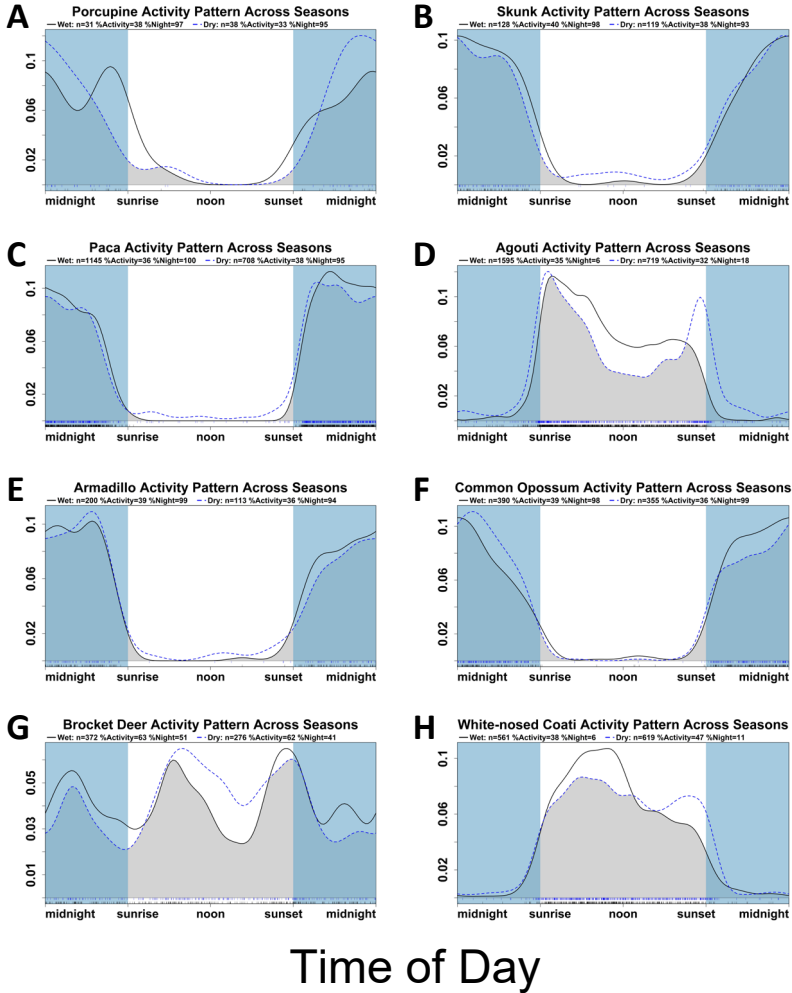

**Supplementary Data SD5-2.** Comparison of circadian activity density between dry season and wet season for 8 prey species based on all survey sites 2010-2019: (A) porcupine, (B) skunk, (C) paca, (D) agouti, (E) armadillo, (F) common opossum, (G) red brocket deer, and (H) coati. Time of day is based on sun time. Sample size of independent records for dry vs. wet season ( $n$ ), percent time active for dry vs. wet season (%Activity), and percent time active at night for dry vs. wet season (%Night) are indicated on the top of each plot frame. Mann-Whitney tests for all survey species revealed no significant influence of season on %Activity ( $n = 24$ ,  $U = 278.5$ ,  $P = 0.85$ ) or %Night ( $n = 24$ ,  $U = 270.0$ ,  $P = 0.72$ ).

Temporal Density

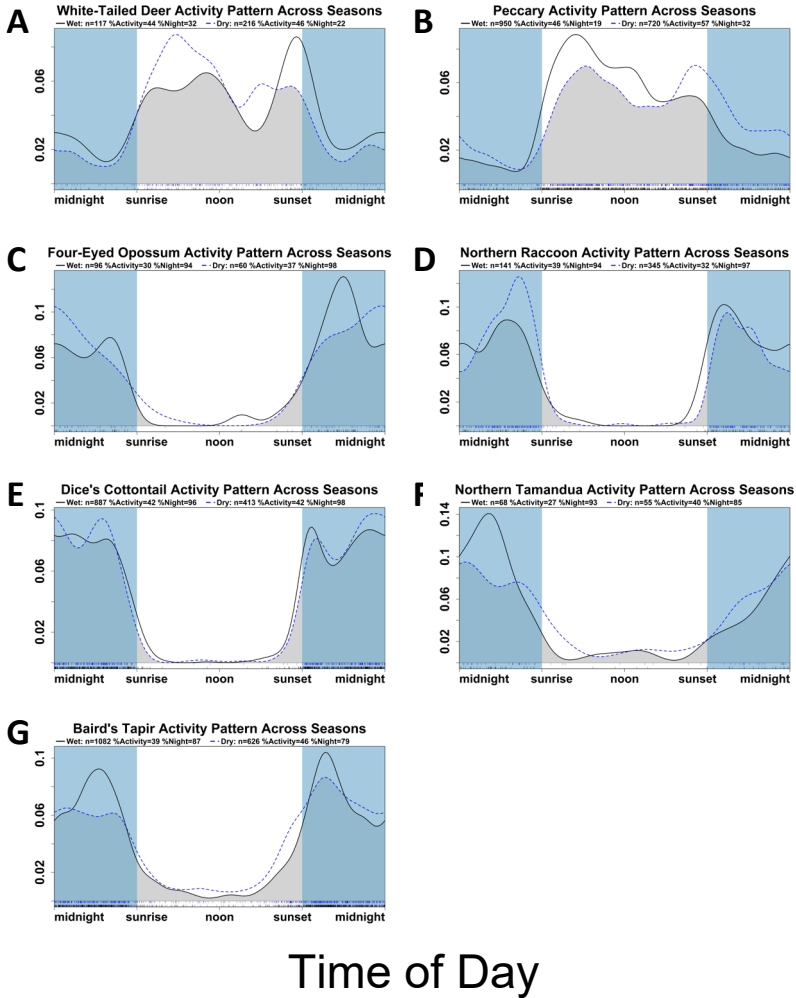

**Supplementary Data SD5-3.** Comparison of circadian activity density between dry season and wet season for 7 prey species based on all survey sites 2010-2019: (A) white-tailed deer, (B) collared peccary, (C) four-eyed opossum, (D) raccoon, (E) Dice's cottontail, (F) tamandua, and (G) Baird's tapir. Time of day is based on sun time. Sample size of independent records for dry vs. wet season ( $n$ ), percent time active for dry vs. wet season (%Activity), and percent time active at night for dry vs. wet season (%Night) are indicated on the top of each plot frame. Mann-Whitney tests for all survey species revealed no significant influence of season on %Activity ( $n = 24$ ,  $U = 278.5$ ,  $P = 0.85$ ) or %Night ( $n = 24$ ,  $U = 270.0$ ,  $P = 0.72$ ).
