# Supplementary material for: Circadian activity patterns of mammalian predators and prey in Costa Rica
Source: PubMed Central journal article supplement — J Mammal. 2020 Oct 3;101(5):1313–31. doi: 10.1093/jmammal/gyaa103 (PMC7733402; doi:10.1093/jmammal/gyaa103), 2020-10-03
Supplement: gyaa103_suppl_supplementary_data_7.pdf [file gyaa103_suppl_supplementary_data_7.pdf]

Temporal Density

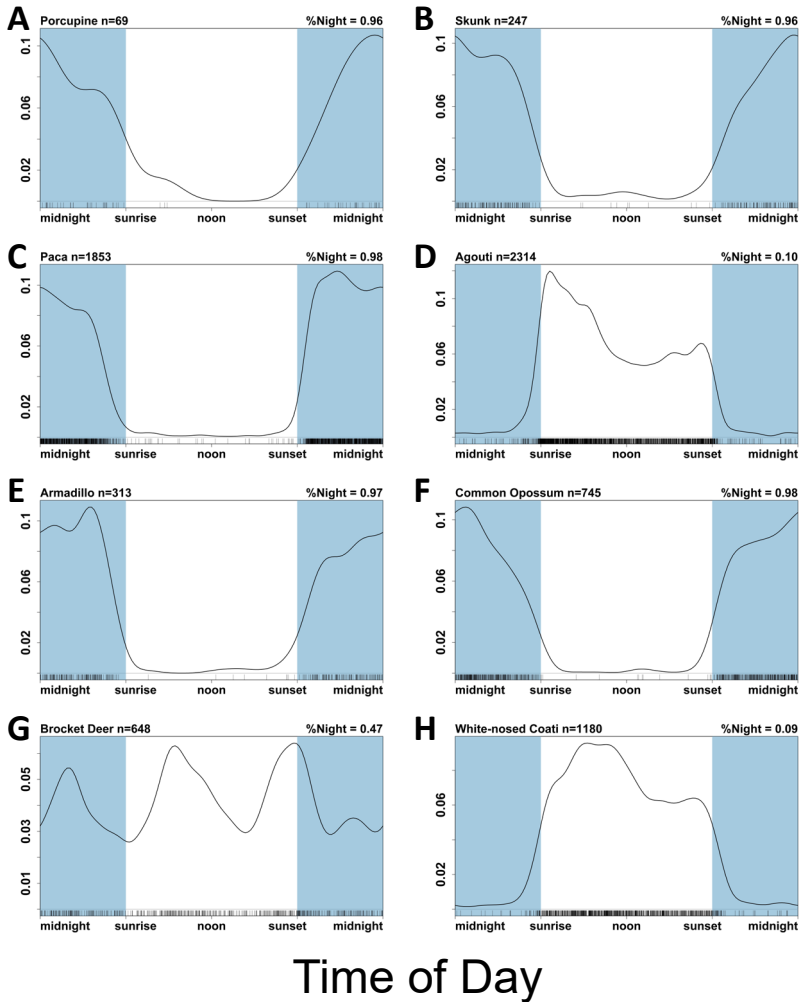

**Supplementary Data SD7-1.** Circadian activity density of 8 prey species based on all survey sites 2010-2019: (A) porcupine, (B) skunk, (C) paca, (D) agouti, (E) armadillo, (F) common opossum, (G) red brocket deer, and (H) coati. Time of day is based on sun time. Sample size of independent records (n) and percent time active at night (%Night) are indicated on the top of each plot frame.

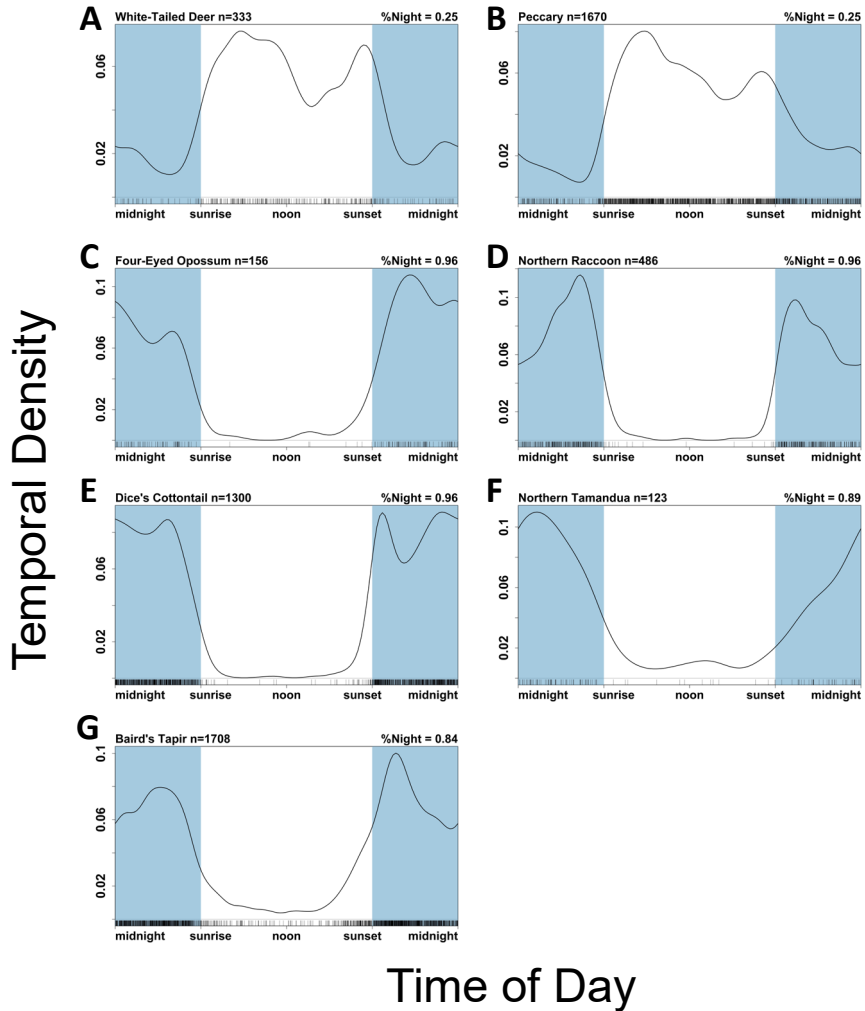

**Supplementary Data SD7-2.** Circadian activity density of 7 prey species based on all survey sites 2010-2019: (A) white-tailed deer, (B) collared peccary, (C) four-eyed opossum, (D) raccoon, (E) Dice's cottontail, (F) tamandua, and (G) Baird's tapir. Time of day is based on sun time. Sample size of independent records (n) and percent time active at night (%Night) are indicated on the top of each plot frame.
