# Supplementary material for: Circadian activity patterns of mammalian predators and prey in Costa Rica
Source: PubMed Central journal article supplement — J Mammal. 2020 Oct 3;101(5):1313–31. doi: 10.1093/jmammal/gyaa103 (PMC7733402; doi:10.1093/jmammal/gyaa103), 2020-10-03
Supplement: gyaa103_suppl_supplementary_data_8.pdf [file gyaa103_suppl_supplementary_data_8.pdf]

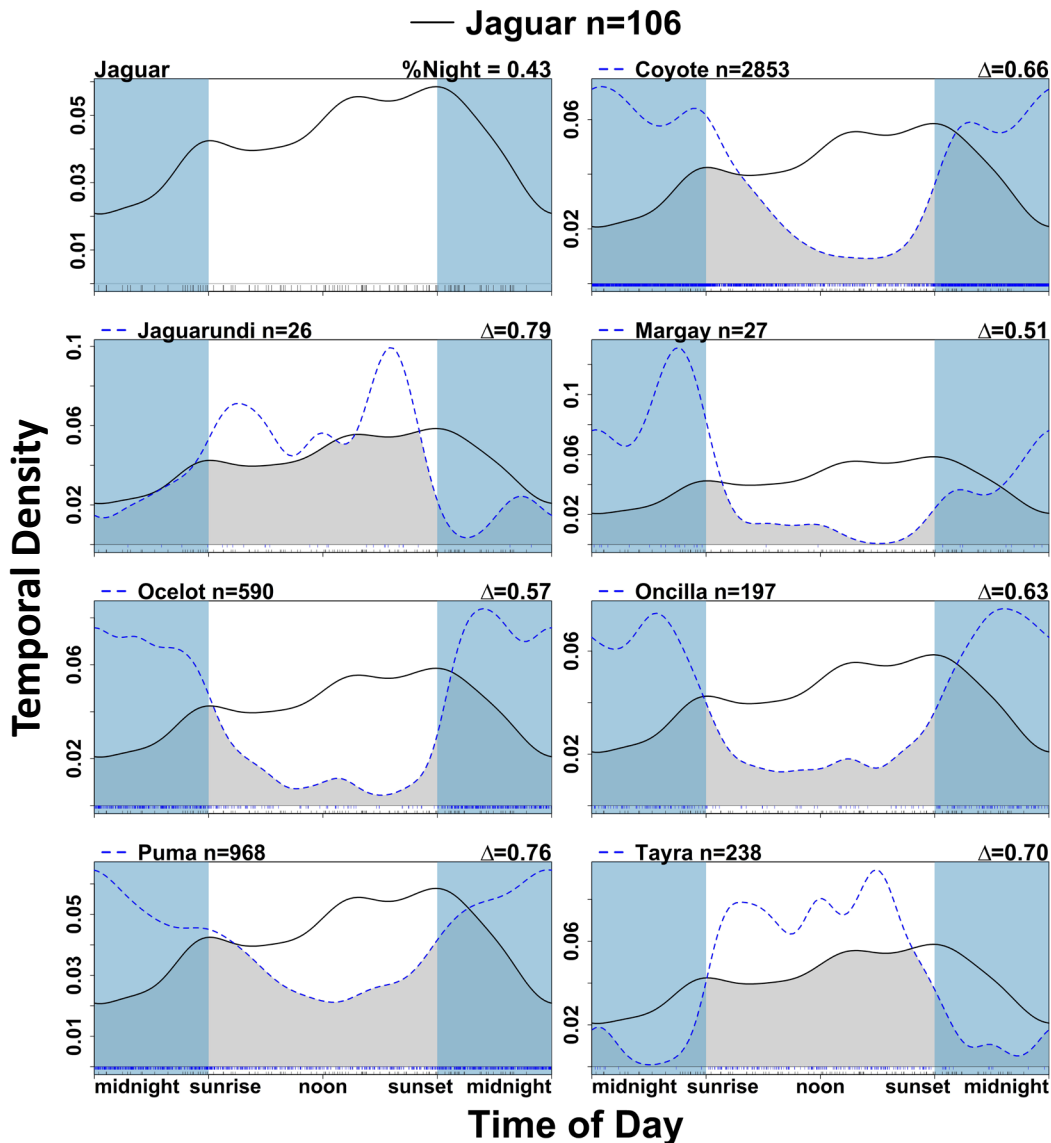

**Supplementary Data SD8-1.** Comparison of activity overlap plots between jaguar (*Panthera onca*) and intraguild competitors based on all survey sites 2010-2019. The top left frame shows jaguar activity pattern and percent time active at night (%Night). All other frames show the overlap between jaguar and the competitor species, with common name, number of independent records ( $n$ ), and the coefficient of overlapping ( $\Delta$ ) indicated on the top of the frame.

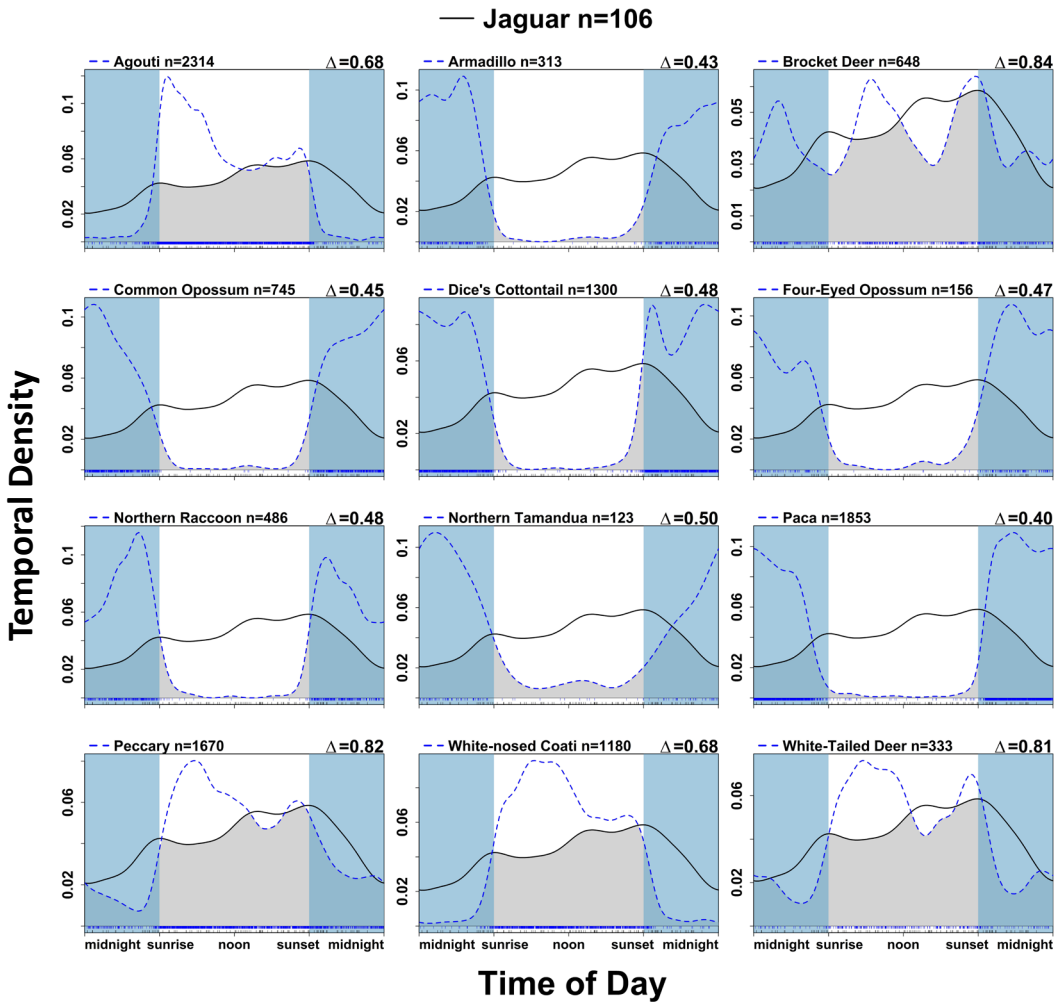

**Supplementary Data SD8-2.** Comparison of activity overlap plots between jaguar (*Panthera onca*) and prey species based on all survey sites 2010-2019. The overlap between jaguar and prey species are shown, with common name, number of independent records ( $n$ ), and the coefficient of overlapping ( $\Delta$ ) indicated on the top of the frame.

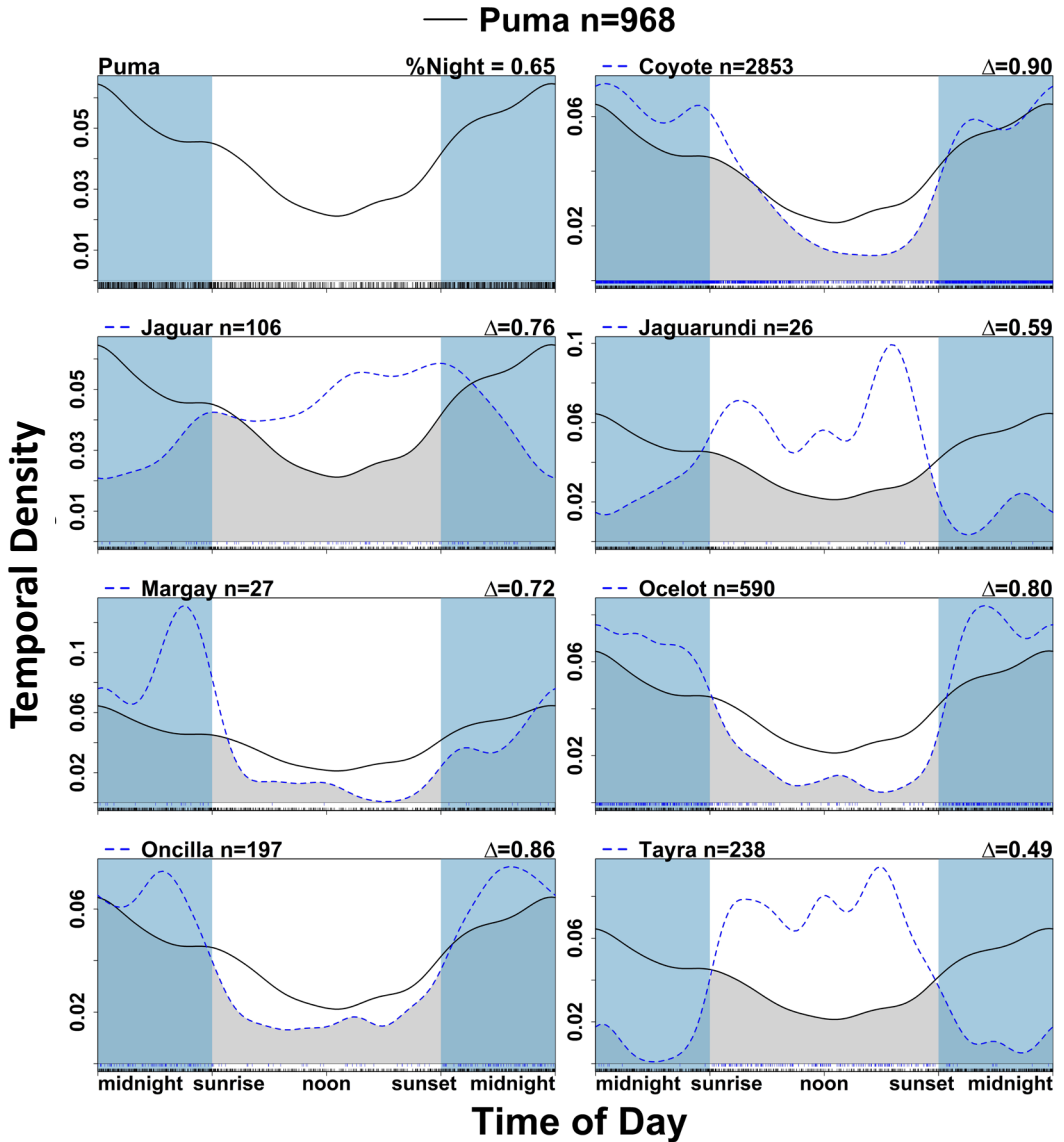

**Supplementary Data SD8-3.** Comparison of activity overlap plots between puma (*Puma concolor*) and intraguild competitors based on all survey sites 2010-2019. The top left frame shows puma activity pattern and percent time active at night (%Night). All other frames show the overlap between puma and the competitor species, with common name, number of independent records ( $n$ ), and the coefficient of overlapping ( $\Delta$ ) indicated on the top of the frame.

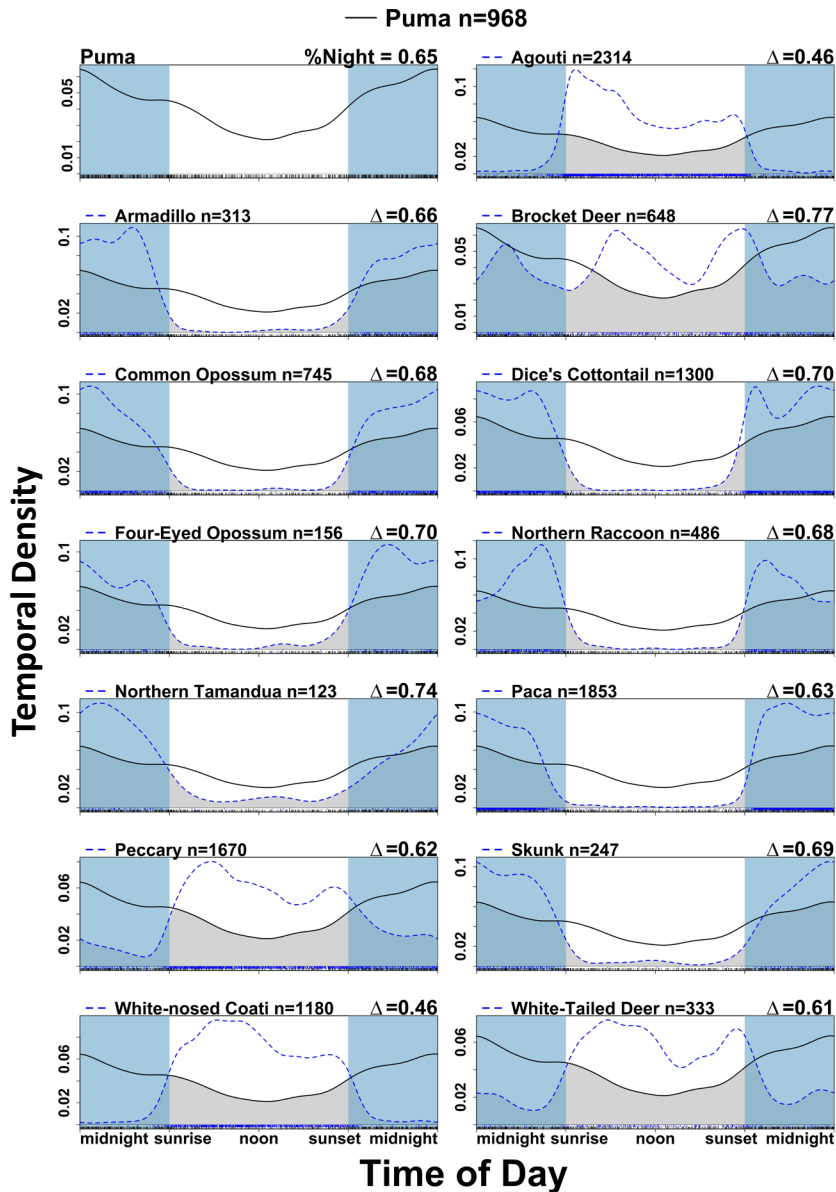

**Supplementary Data SD8-4.** Comparison of activity overlap plots between puma (*Puma concolor*) and prey species based on all survey sites 2010-2019. The top left frame shows puma activity pattern and percent time active at night (%Night). All other frames show the overlap between puma and prey species, with common name, number of independent records (*n*), and the coefficient of overlapping ( $\Delta$ ) indicated on the top of the frame.



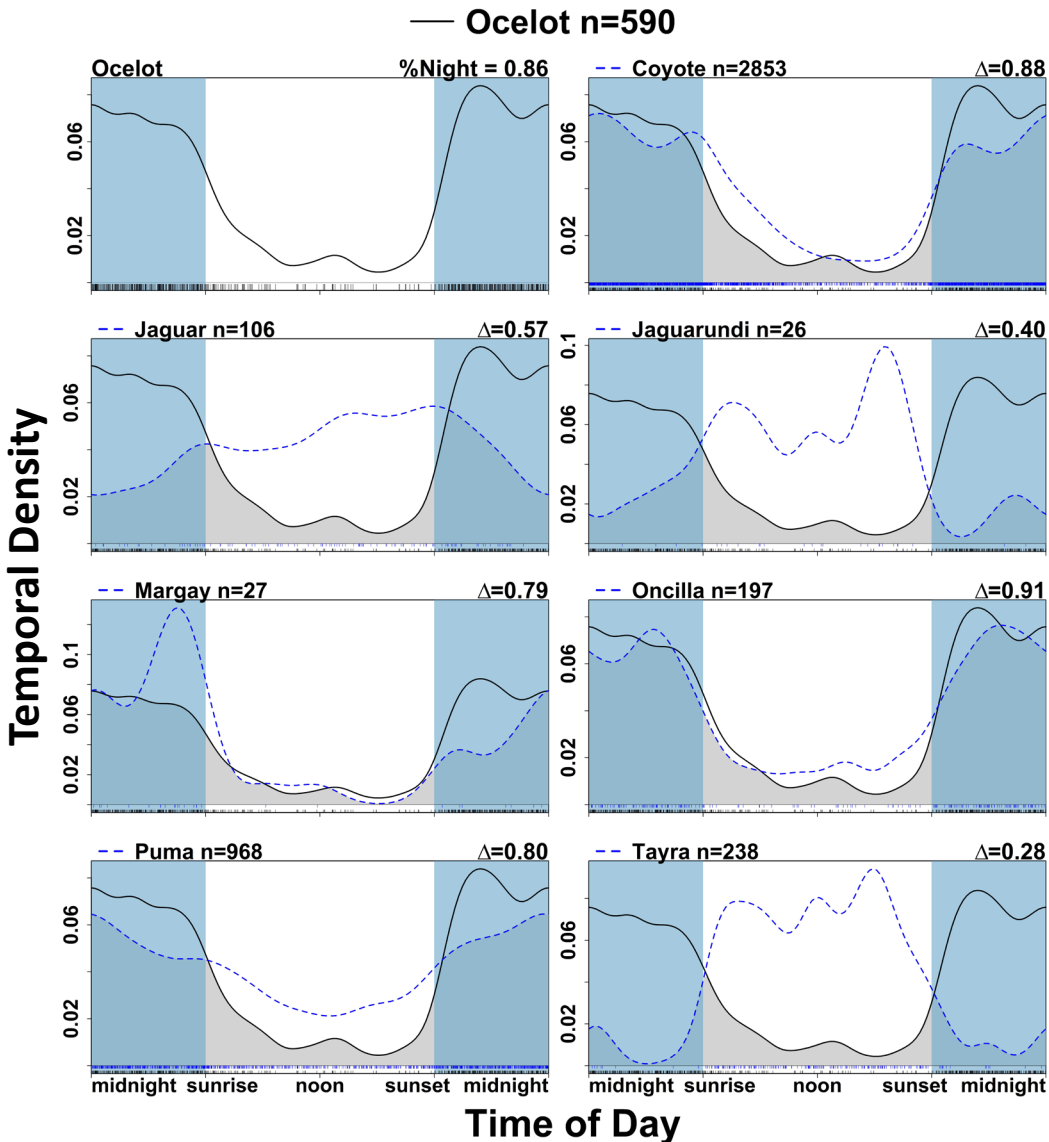

**Supplementary Data SD8-5.** Comparison of activity overlap plots between ocelot (*Leopardus pardalis*) and intraguild competitors based on all survey sites 2010-2019. The top left frame shows ocelot activity pattern and percent time active at night (%Night). All other frames show the overlap between ocelot and the competitor species, with common name, number of independent records (*n*), and the coefficient of overlapping ( $\Delta$ ) indicated on the top of the frame.

— Ocelot n=590

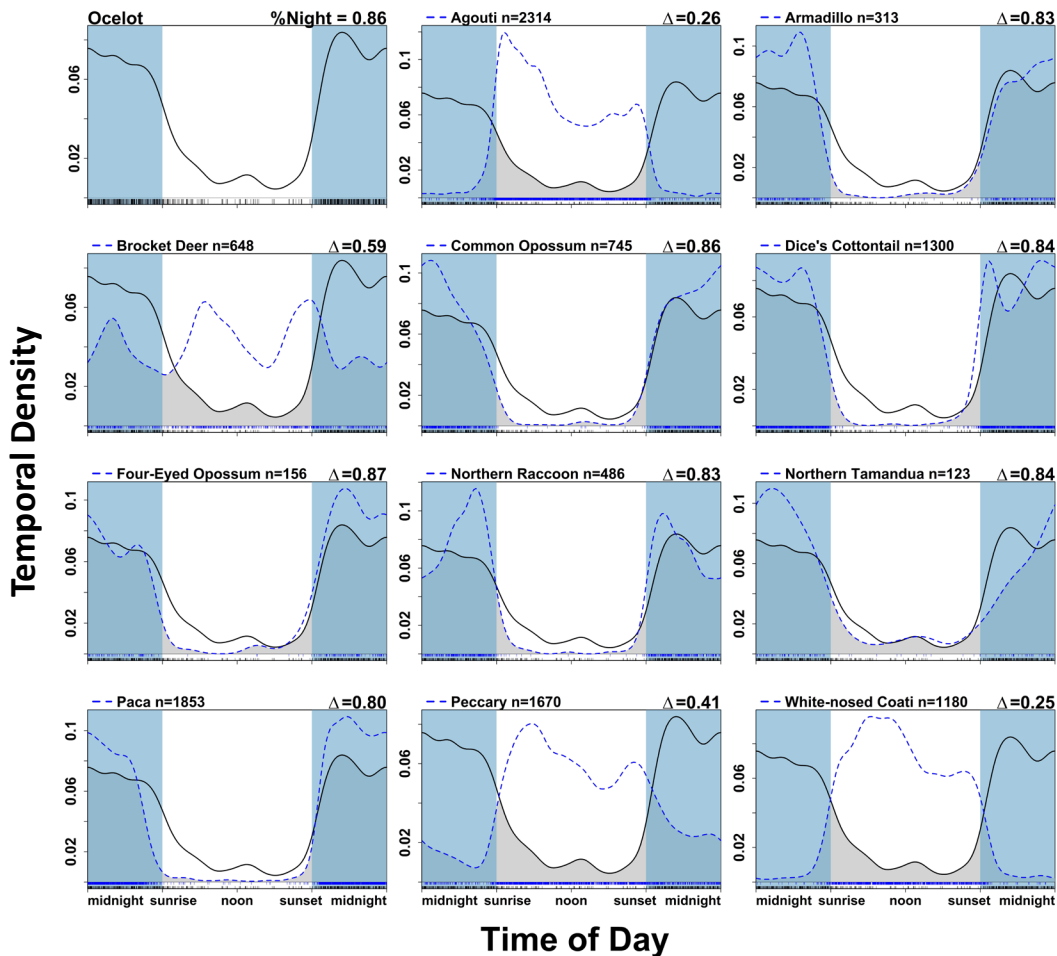

**Supplementary Data SD8-6.** Comparison of activity overlap plots between ocelot (*Leopardus pardalis*) and prey species based on all survey sites 2010-2019. The top left frame shows ocelot activity pattern and percent time active at night (%Night). All other frames show the overlap between ocelot and prey species, with common name, number of independent records ( $n$ ), and the coefficient of overlapping ( $\Delta$ ) indicated on the top of the frame.

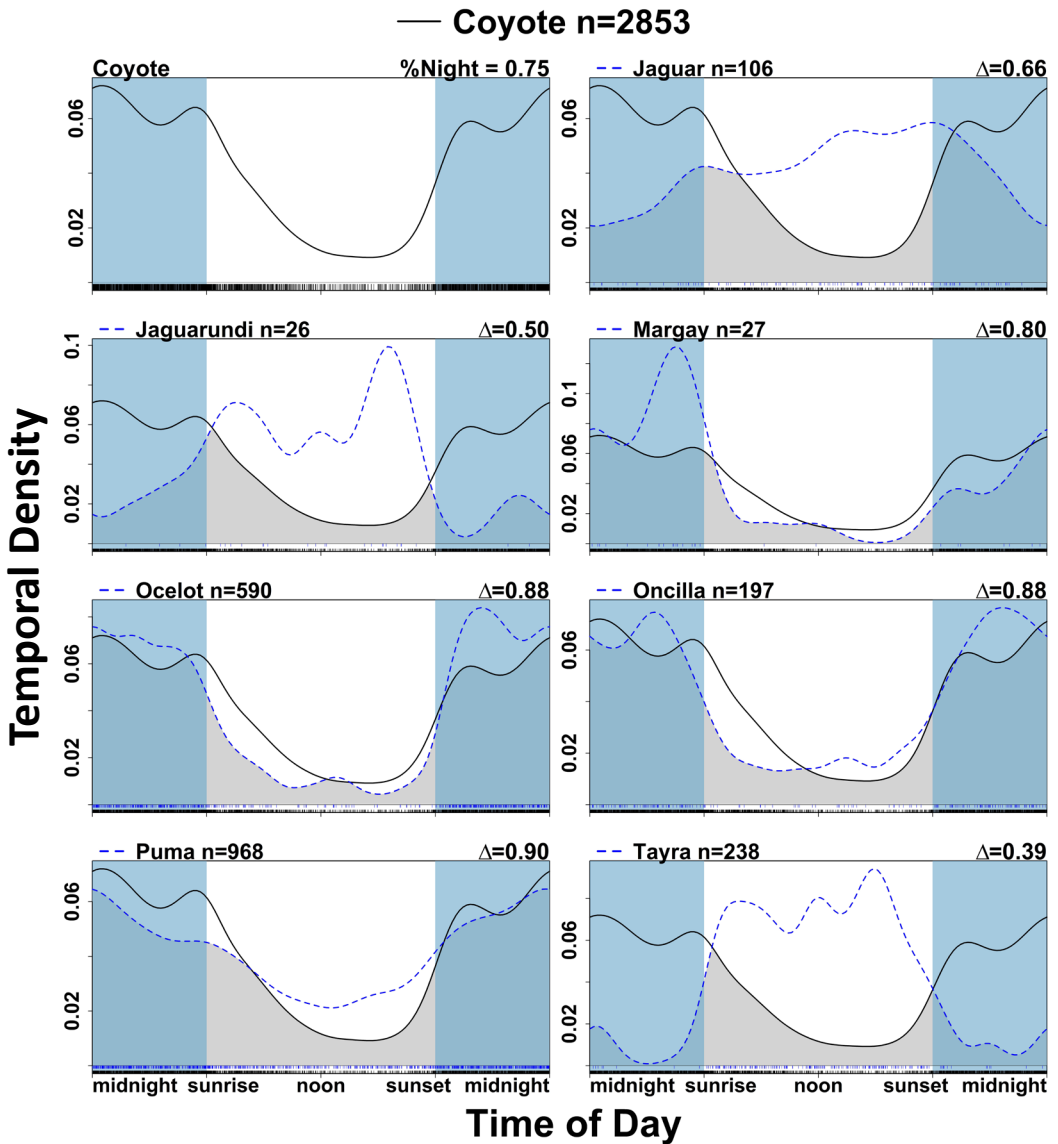

**Supplementary Data SD8-7.** Comparison of activity overlap plots between coyote (*Canis latrans*) and intraguild competitors based on all survey sites 2010-2019. The top left frame shows coyote activity pattern and percent time active at night (%Night). All other frames show the overlap between coyote and the competitor species, with common name, number of independent records ( $n$ ), and the coefficient of overlapping ( $\Delta$ ) indicated on the top of the frame.

— Coyote n=2853

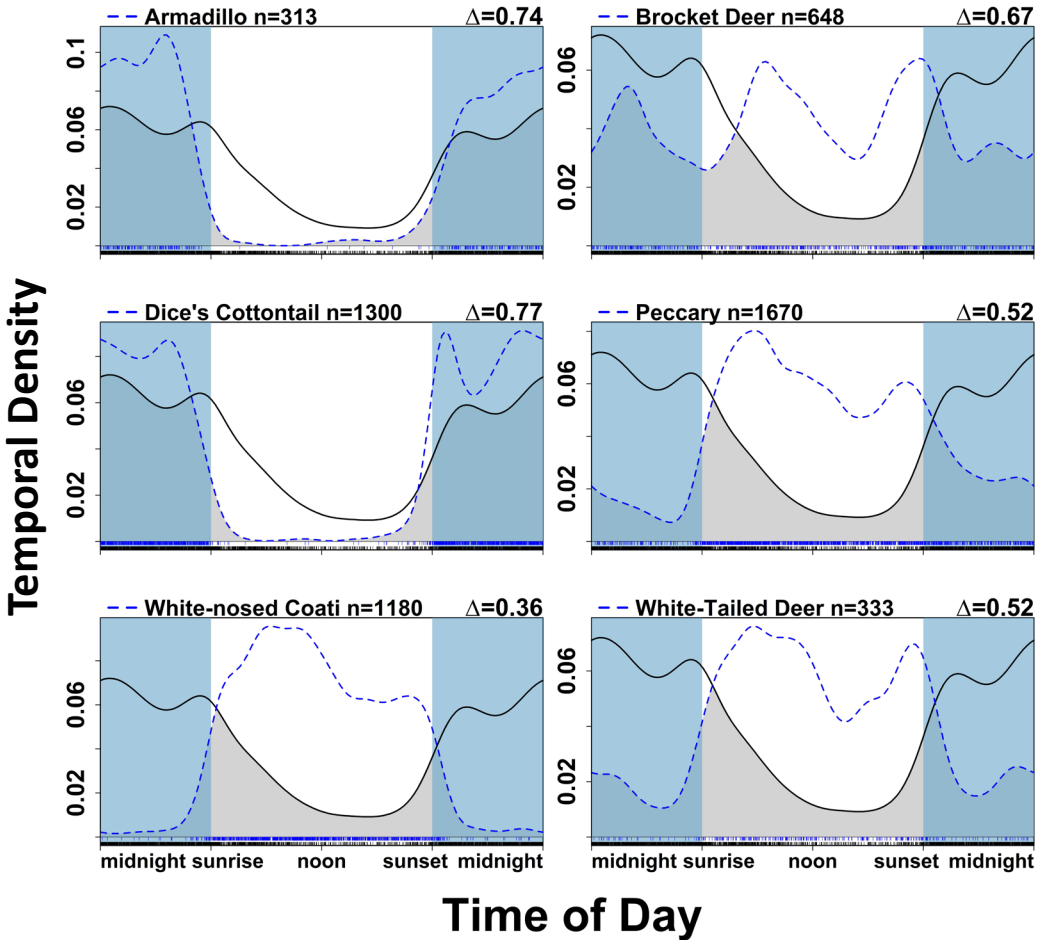

**Supplementary Data SD8-8.** Comparison of activity overlap plots between coyote (*Canis latrans*) and prey species based on all survey sites 2010-2019. The overlap between coyote and prey species are shown, with common name, number of independent records (*n*), and the coefficient of overlapping ( $\Delta$ ) indicated on the top of the frame.

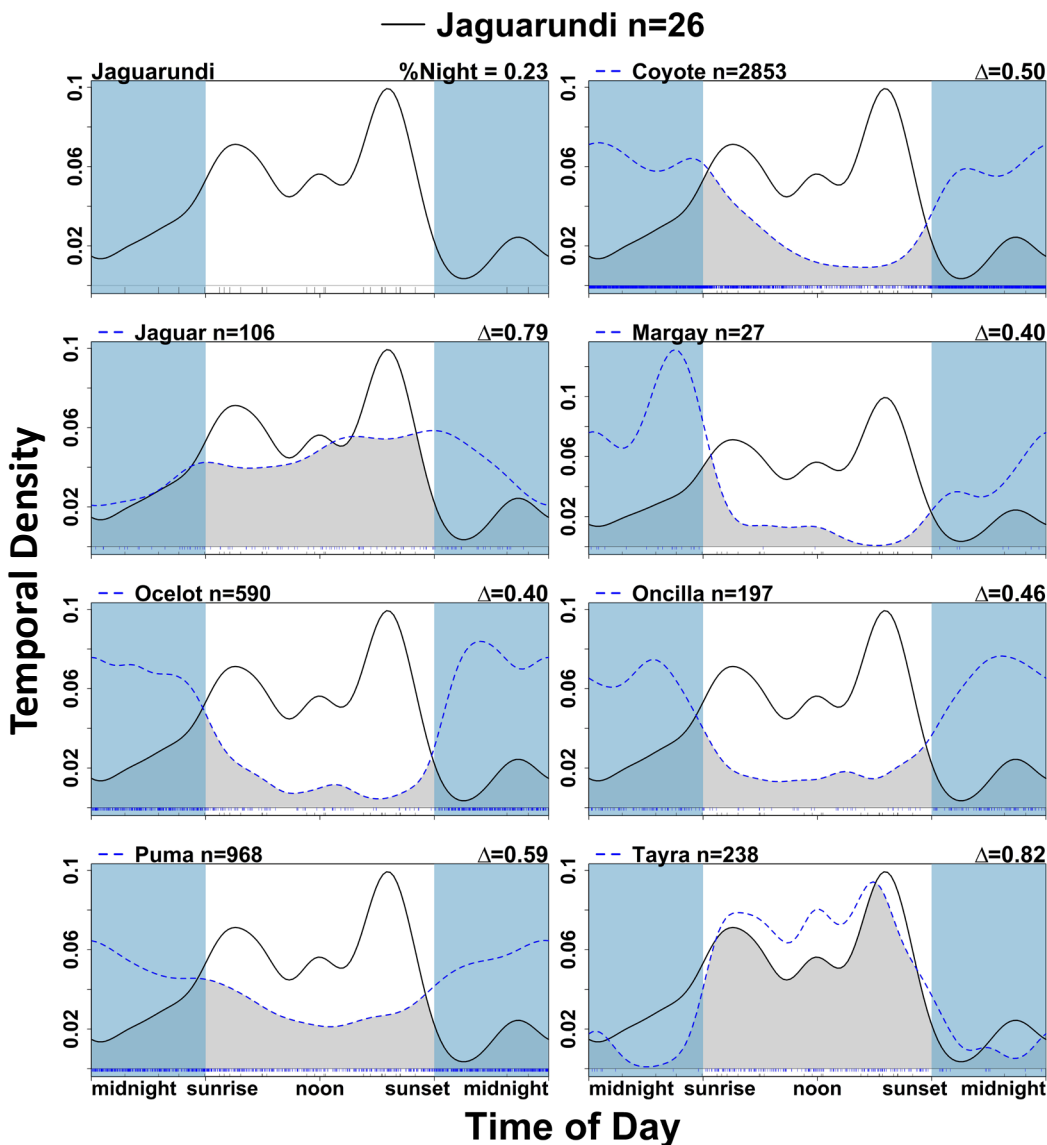

**Supplementary Data SD8-9.** Comparison of activity overlap plots between jaguarundi (*Herpailurus yaguarondi*) and intraguild competitors based on all survey sites 2010-2019. The top left frame shows jaguarundi activity pattern and percent time active at night (%Night). All other frames show the overlap between jaguarundi and the competitor species, with common name, number of independent records (*n*), and the coefficient of overlapping ( $\Delta$ ) indicated on the top of the frame.

— Jaguarundi n=26

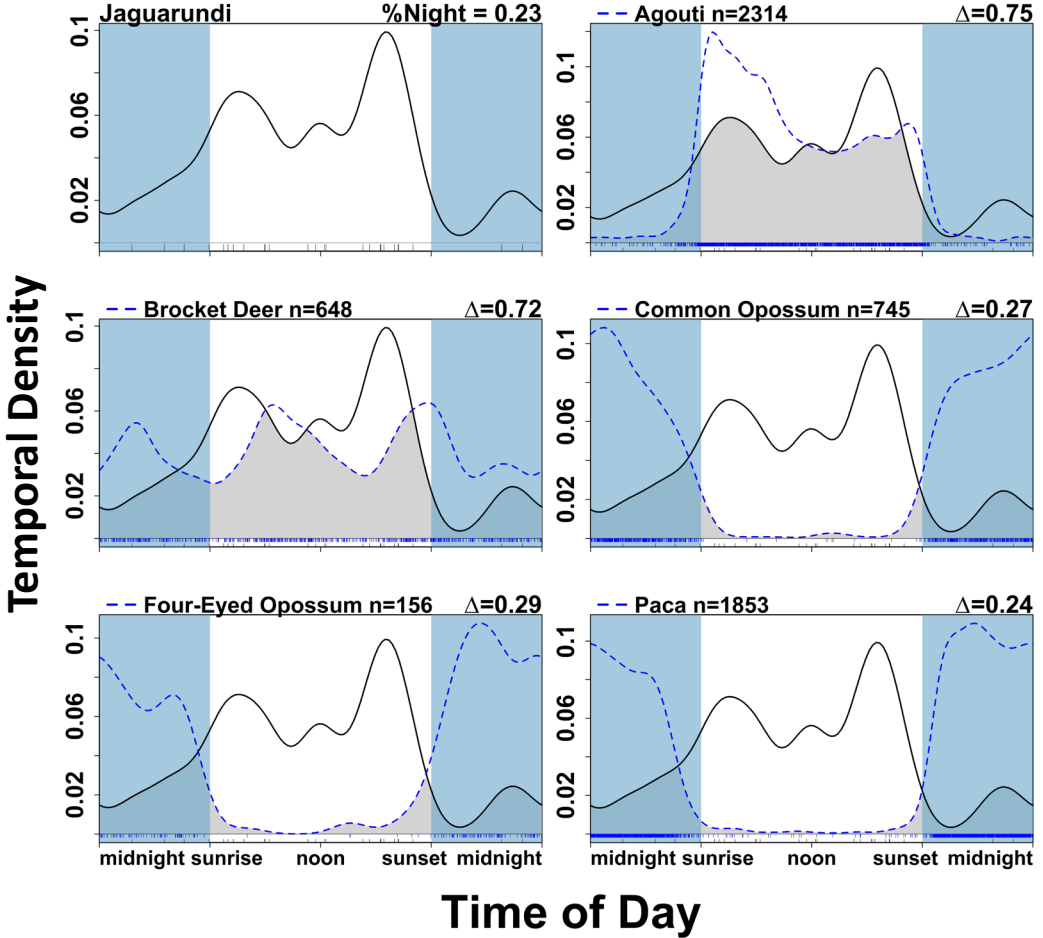

**Supplementary Data SD8-10.** Comparison of activity overlap plots between jaguarundi (*Herpailurus yagouaroundi*) and prey species based on all survey sites 2010-2019. The top left frame shows jaguarundi activity pattern and percent time active at night (%Night). All other frames show the overlap between jaguarundi and prey species, with common name, number of independent records (*n*), and the coefficient of overlapping ( $\Delta$ ) indicated on the top of the frame.

— Tayra n=238

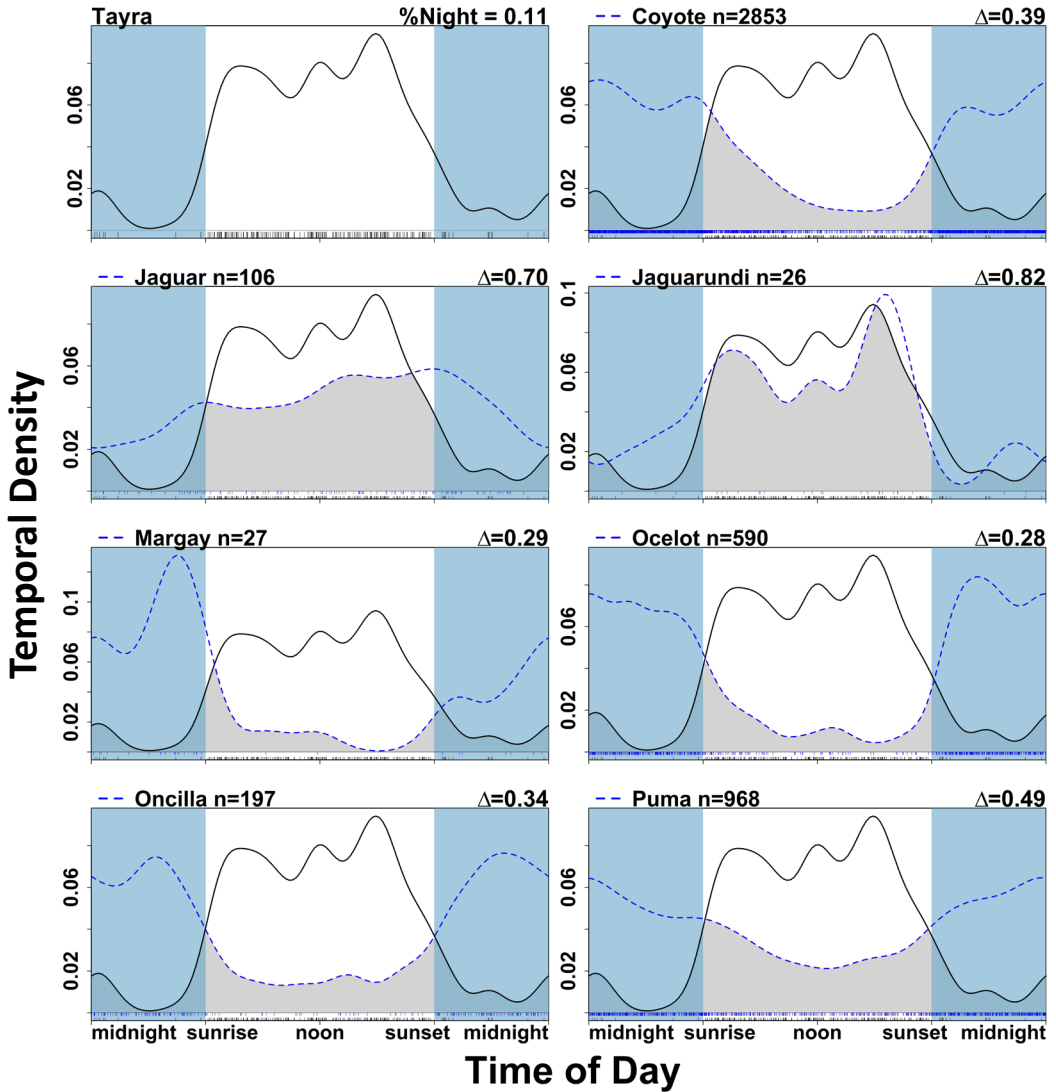

**Supplementary Data SD8-11.** Comparison of activity overlap plots between tayra (*Eira barbara*) and intraguild competitors based on all survey sites 2010-2019. The top left frame shows tayra activity pattern and percent time active at night (%Night). All other frames show the overlap between tayra and the competitor species, with common name, number of independent records (*n*), and the coefficient of overlapping ( $\Delta$ ) indicated on the top of the frame.

— Tayra n=238

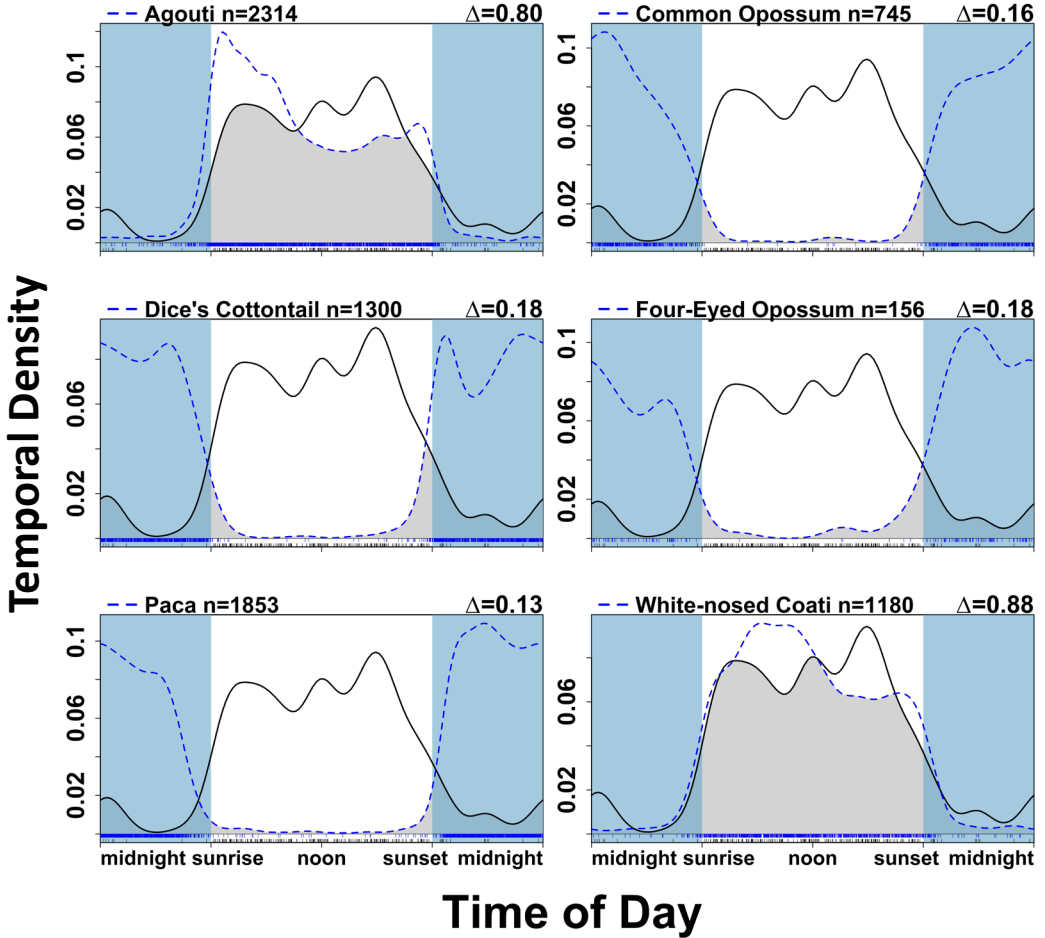

**Supplementary Data SD8-12.** Comparison of activity overlap plots between tayra (*Eira barbara*) and prey species based on all survey sites 2010-2019. The overlap between tayra and prey species are shown, with common name, number of independent records (*n*), and the coefficient of overlapping ( $\Delta$ ) indicated on the top of the frame.



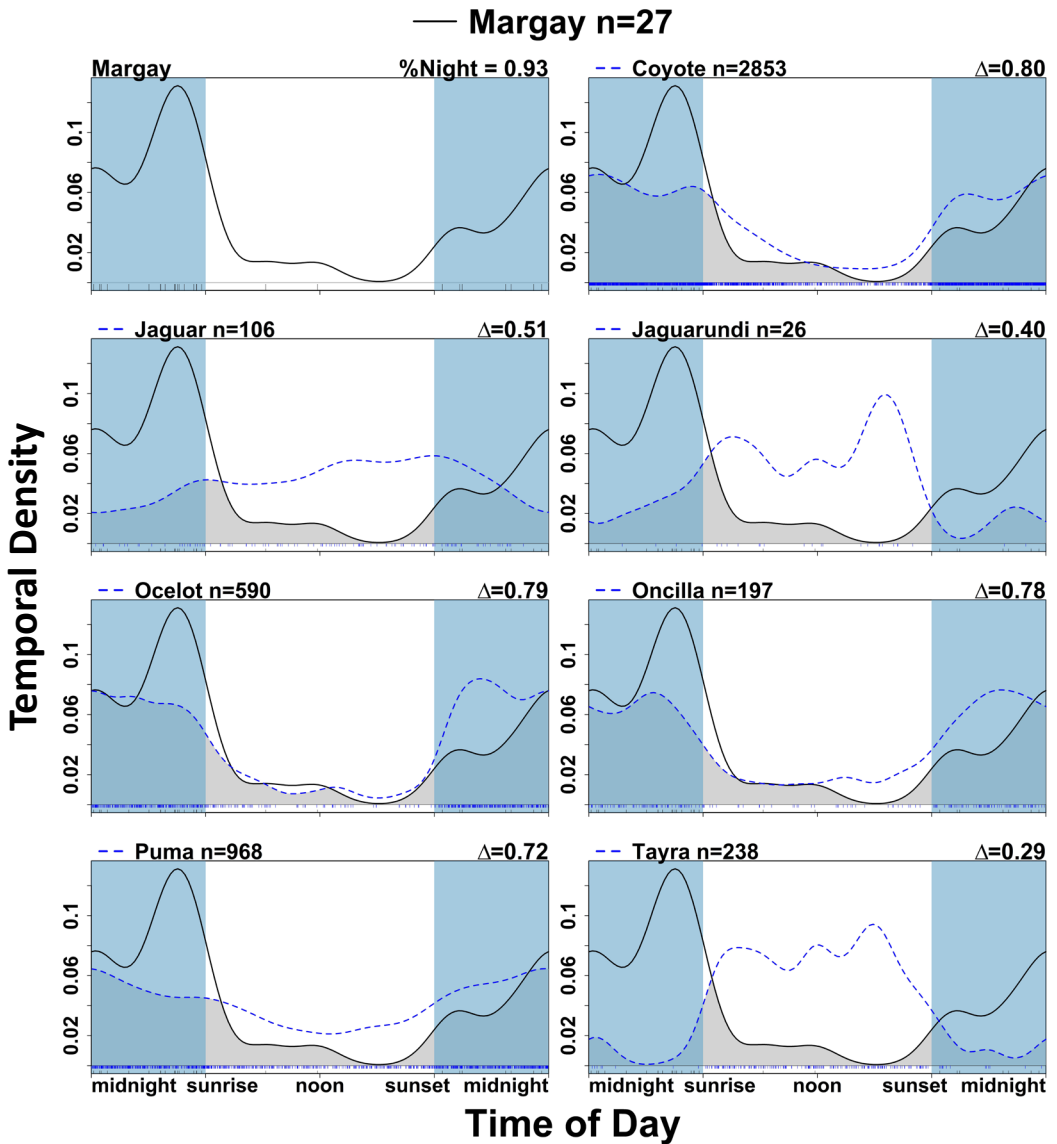

**Supplementary Data SD8-13.** Comparison of activity overlap plots between margay (*Leopardus wiedii*) and intraguild competitors based on all survey sites 2010-2019. The top left frame shows margay activity pattern and percent time active at night (%Night). All other frames show the overlap between margay and the competitor species, with common name, number of independent records ( $n$ ), and the coefficient of overlapping ( $\Delta$ ) indicated on the top of the frame.

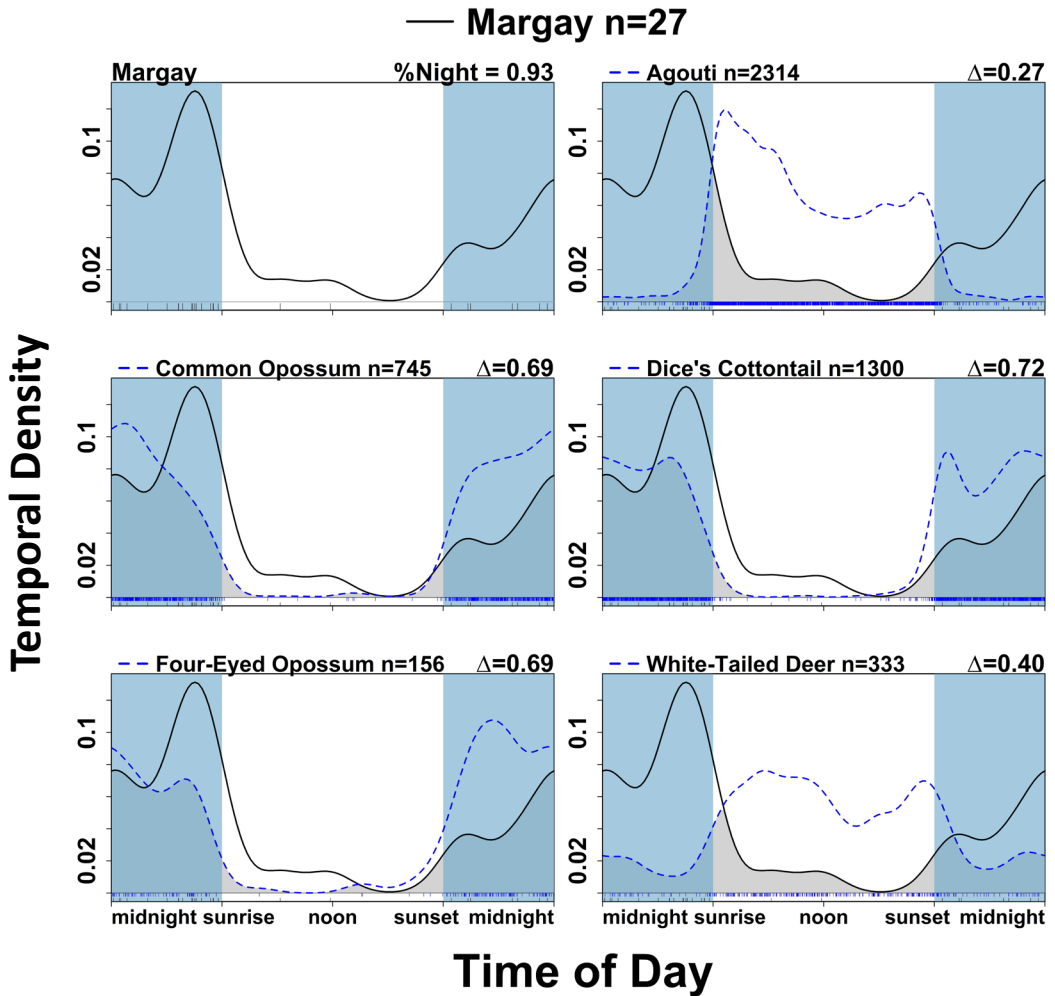

**Supplementary Data SD8-14.** Comparison of activity overlap plots between margay (*Leopardus wiedii*) and prey species based on all survey sites 2010-2019. The top left frame shows margay activity pattern and percent time active at night (%Night). All other frames show the overlap between margay and prey species, with common name, number of independent records ( $n$ ), and the coefficient of overlapping ( $\Delta$ ) indicated on the top of the frame.

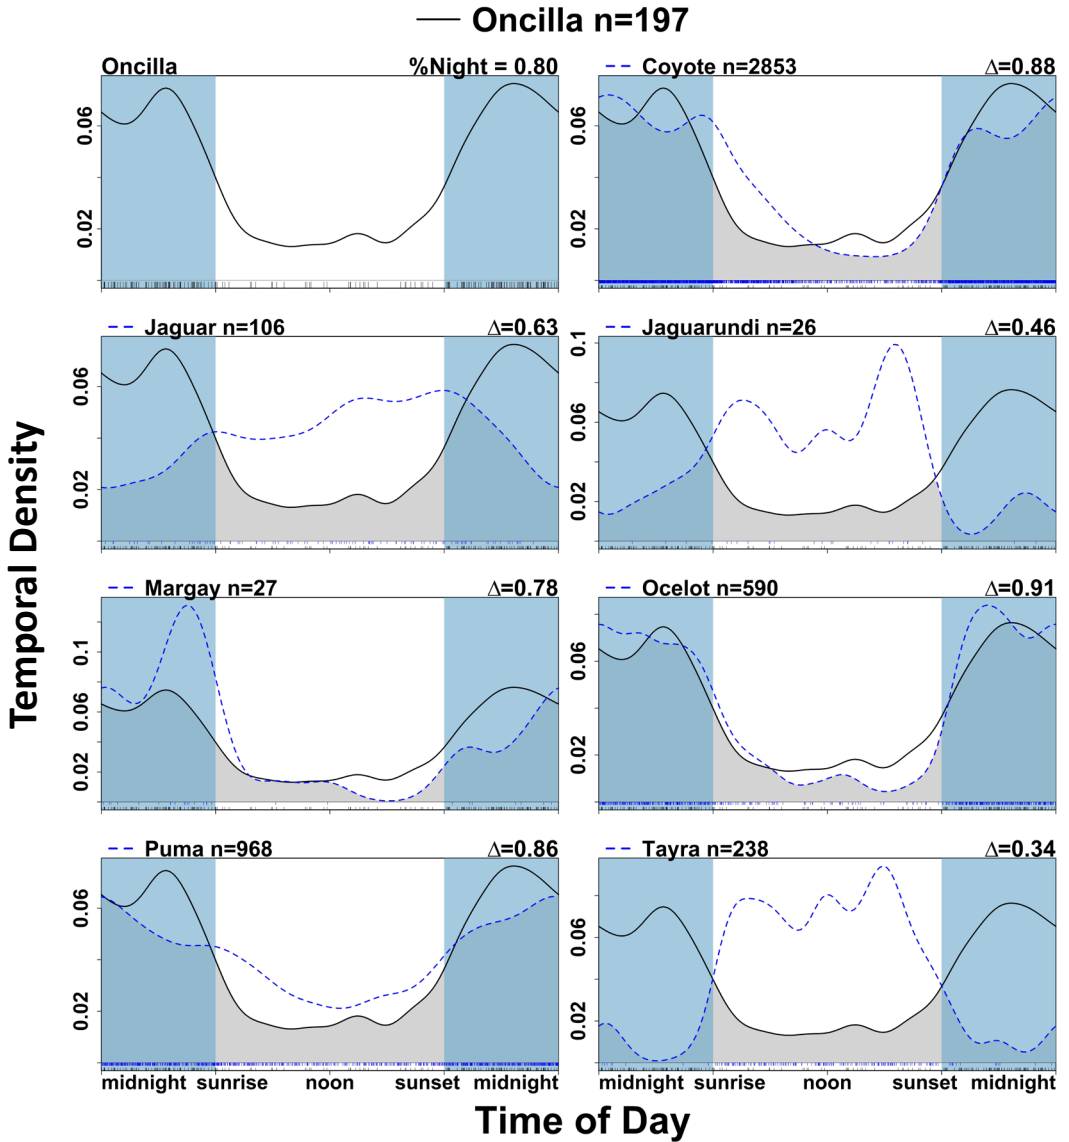

**Supplementary Data SD8-15.** Comparison of activity overlap plots between oncilla (*Leopardus tigrinus oncilla*) and intraguild competitors based on all survey sites 2010-2019. The top left frame shows oncilla activity pattern and percent time active at night (%Night). All other frames show the overlap between oncilla and the competitor species, with common name, number of independent records ( $n$ ), and the coefficient of overlapping ( $\Delta$ ) indicated on the top of the frame.

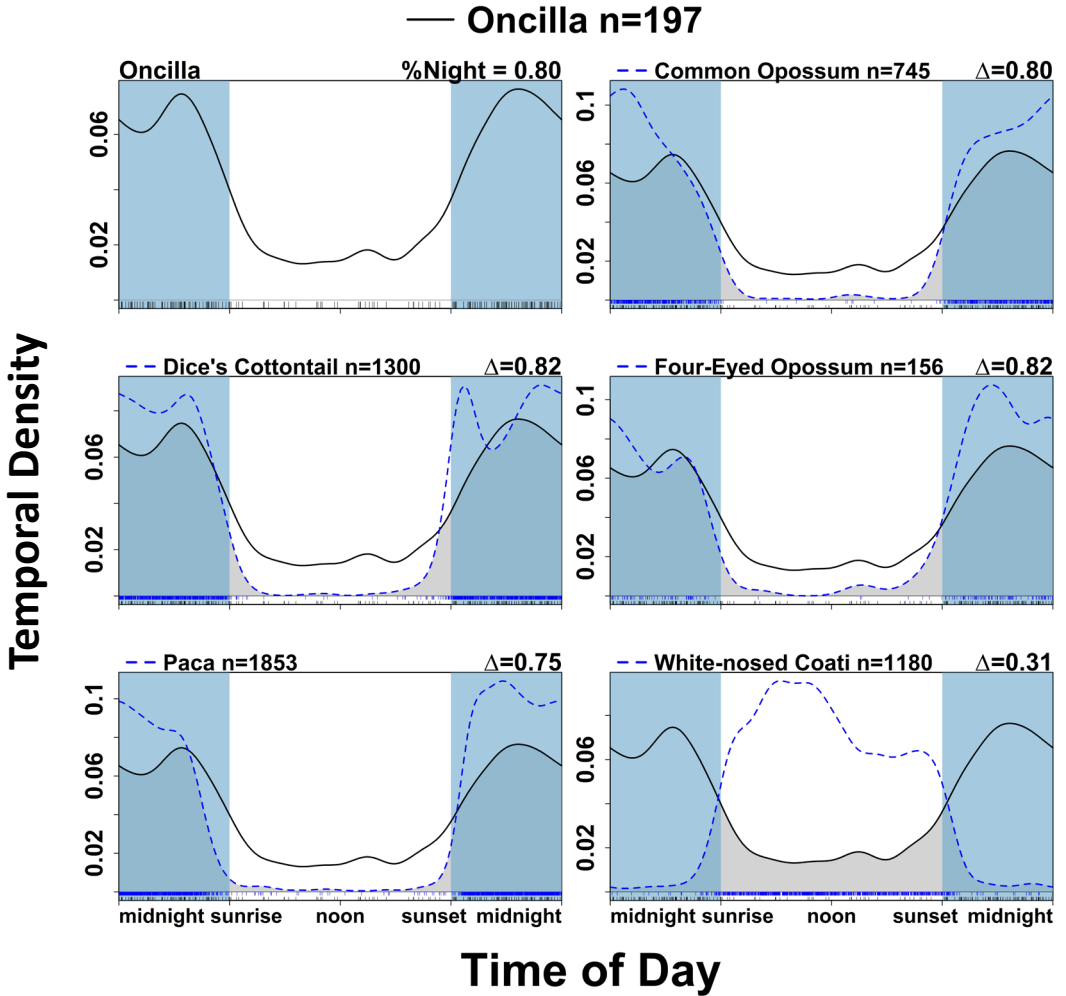

**Supplementary Data SD8-16.** Comparison of activity overlap plots between oncilla (*Leopardus tigrinus oncilla*) and prey species based on all survey sites 2010-2019. The top left frame shows oncilla activity pattern and percent time active at night (%Night). All other frames show the overlap between oncilla and prey species, with common name, number of independent records ( $n$ ), and the coefficient of overlapping ( $\Delta$ ) indicated on the top of the frame.
