# Supplementary material for: Circadian activity patterns of mammalian predators and prey in Costa Rica
Source: PubMed Central journal article supplement — J Mammal. 2020 Oct 3;101(5):1313–31. doi: 10.1093/jmammal/gyaa103 (PMC7733402; doi:10.1093/jmammal/gyaa103), 2020-10-03
Supplement: gyaa103_suppl_supplementary_data_9.pdf [file gyaa103_suppl_supplementary_data_9.pdf]

**Supplementary Data SD9-1.**— Activity overlap between jaguar (*Panthera onca*) and potential intraguild competitors (Predator) and prey species (Prey) for all sites, listed in order of the Overlap Estimate with Overall Relative Abundance Index (RAI) and 3 measures of significance (Watson's  $U^2$ ,  $W_r$ , Fisher's Exact Test). Predicted primary and secondary competing predators and prey species are listed under Primary Interactions. Only documented prey species are listed (Supplemental Data SD1-2). Based on overlap and RAI, collared peccary (*Pecari tajacu*) and red brocket deer (*Mazama temama*) are predicted to be the main prey of jaguar, and puma (*Puma concolor*) and coyote (*Canis latrans*) are predicted to be the most important competitors.

| Species-1     | $N_1$ | Species- 2             | Predator-Prey | $N_2$ | Sites Recorded | Overall RAI | Overlap Estimate | 95% Lower | 95% Upper | Watson $U^2$ | P- $U^2$ | $W_r$  | P- $W_r$ | Fisher's Exact | Primary Interactions |
|---------------|-------|------------------------|---------------|-------|----------------|-------------|------------------|-----------|-----------|--------------|----------|--------|----------|----------------|----------------------|
| Panthera onca | 106   | Herpailurus yaguarondi | Predator      | 26    | 6              | 0.43        | 0.788            | 0.649     | 0.915     | 0.12         | 0.193    | 4.78   | 0.272    | 0.582          |                      |
| Panthera onca | 106   | Puma concolor          | Predator      | 968   | 10             | 16.07       | 0.757            | 0.677     | 0.833     | 0.89         | 0.000    | 35.84  | 0.000    | 0.001          | 1 Competitor         |
| Panthera onca | 106   | Eira barbara           | Predator      | 238   | 12             | 3.97        | 0.697            | 0.609     | 0.785     | 0.70         | 0.000    | 24.28  | 0.000    | 0.001          |                      |
| Panthera onca | 106   | Canis latrans          | Predator      | 2853  | 9              | 47.46       | 0.660            | 0.577     | 0.739     | 1.76         | 0.000    | 62.51  | 0.000    | 0.001          | 2 Competitor         |
| Panthera onca | 106   | L. tigrinus oncella    | Predator      | 197   | 11             | 3.29        | 0.631            | 0.535     | 0.730     | 1.29         | 0.000    | 51.52  | 0.000    | 0.001          |                      |
| Panthera onca | 106   | Leopardus pardalis     | Predator      | 590   | 12             | 9.83        | 0.572            | 0.492     | 0.657     | 2.20         | 0.000    | 78.18  | 0.000    | 0.001          |                      |
| Panthera onca | 106   | Leopardus wiedii       | Predator      | 27    | 8              | 0.45        | 0.510            | 0.372     | 0.663     | 0.71         | 0.000    | 28.63  | 0.000    | 0.001          |                      |
| Panthera onca | 106   | Mazama temama          | Prey          | 648   | 10             | 10.81       | 0.843            | 0.777     | 0.899     | 0.12         | 0.178    | 4.84   | 0.266    | 0.026          | 1 Prey               |
| Panthera onca | 106   | Pecari tajacu          | Prey          | 1670  | 11             | 27.84       | 0.822            | 0.752     | 0.887     | 0.32         | 0.003    | 12.56  | 0.004    | 0.001          | 2 Prey               |
| Panthera onca | 106   | Odocoileus virginianus | Prey          | 333   | 7              | 5.56        | 0.812            | 0.729     | 0.882     | 0.27         | 0.009    | 10.35  | 0.015    | 0.001          |                      |
| Panthera onca | 106   | Nasua narica           | Prey          | 1180  | 12             | 19.69       | 0.682            | 0.599     | 0.757     | 1.27         | 0.000    | 39.97  | 0.000    | 0.001          |                      |
| Panthera onca | 106   | Dasyprocta punctata    | Prey          | 2314  | 9              | 38.62       | 0.679            | 0.615     | 0.749     | 1.22         | 0.000    | 36.27  | 0.000    | 0.001          |                      |
| Panthera onca | 106   | Tamandua mexicana      | Prey          | 123   | 7              | 2.05        | 0.497            | 0.404     | 0.593     | 1.94         | 0.000    | 77.65  | 0.000    | 0.001          |                      |
| Panthera onca | 106   | Sylvilagus dicei       | Prey          | 1300  | 6              | 21.70       | 0.485            | 0.406     | 0.562     | 3.23         | 0.000    | 98.50  | 0.000    | 0.001          |                      |
| Panthera onca | 106   | Procyon lotor          | Prey          | 486   | 8              | 8.11        | 0.481            | 0.390     | 0.558     | 2.71         | 0.000    | 85.67  | 0.000    | 0.001          |                      |
| Panthera onca | 106   | Philander opossum      | Prey          | 156   | 9              | 2.59        | 0.475            | 0.382     | 0.568     | 2.21         | 0.000    | 83.08  | 0.000    | 0.001          |                      |
| Panthera onca | 106   | Didelphis marsupialis  | Prey          | 745   | 11             | 12.43       | 0.453            | 0.380     | 0.542     | 3.64         | 0.000    | 116.36 | 0.000    | 0.001          |                      |
| Panthera onca | 106   | Dasyopus novemcitus    | Prey          | 313   | 11             | 5.22        | 0.432            | 0.351     | 0.511     | 3.19         | 0.000    | 110.60 | 0.000    | 0.001          |                      |
| Panthera onca | 106   | Cuniculus paca         | Prey          | 1853  | 11             | 30.93       | 0.402            | 0.325     | 0.478     | 4.05         | 0.000    | 115.84 | 0.000    | 0.001          |                      |

**Supplementary Data SD9-2.** — Overlap between puma (*Puma concolor*) and potential intraguild competitors (Predator) and prey species (Prey) for all sites, listed in order of the Overlap Estimate with Overall Relative Abundance Index (RAI) and 3 measures of significance (Watson's  $U^2$ ,  $W_r$ , Fisher's Exact Test). Predicted primary and secondary competing predators and prey species are listed under Primary Interactions. Only documented prey species are listed (Supplemental Data SD1-23). Based on overlap and RAI, paca (*Cuniculus paca*) and collared peccary (*Pecari tajacu*) are predicted to be the main prey of puma, and coyote (*Canis latrans*) and ocelot (*Leopardis pardalis*) are predicted to be the most important competitors.

| Species-1     | $N_1$ | Species- 2             | Predator-Prey | $N_2$ | Sites Recorded | Overall RAI | Overlap Estimate | 95% Lower | 95% Upper | Watson $U^2$ | P- $U^2$ | $W_r$  | P- $W_r$ | Fisher's Exact | Primary Interactions |
|---------------|-------|------------------------|---------------|-------|----------------|-------------|------------------|-----------|-----------|--------------|----------|--------|----------|----------------|----------------------|
| Puma concolor | 968   | Canis latrans          | Predator      | 2853  | 9              | 47.46       | 0.896            | 0.869     | 0.921     | 0.97         | 0.000    | 31.31  | 0.000    | 0.001          | 1 Competitor         |
| Puma concolor | 968   | L. tigrinus oncilla    | Predator      | 197   | 11             | 3.29        | 0.862            | 0.807     | 0.921     | 0.30         | 0.005    | 10.79  | 0.006    | 0.058          |                      |
| Puma concolor | 968   | Leopardus pardalis     | Predator      | 590   | 12             | 9.83        | 0.804            | 0.769     | 0.843     | 1.28         | 0.000    | 40.41  | 0.000    | 0.001          | 2 Competitor         |
| Puma concolor | 968   | Panthera onca          | Predator      | 106   | 7              | 1.77        | 0.757            | 0.670     | 0.831     | 0.89         | 0.000    | 35.84  | 0.000    | 0.001          |                      |
| Puma concolor | 968   | Leopardus wiedii       | Predator      | 27    | 8              | 0.45        | 0.720            | 0.576     | 0.862     | 0.30         | 0.006    | 11.27  | 0.003    | 0.021          |                      |
| Puma concolor | 968   | Herpailurus yaguarondi | Predator      | 26    | 6              | 0.43        | 0.588            | 0.452     | 0.734     | 0.46         | 0.000    | 18.37  | 0.000    | 0.011          |                      |
| Puma concolor | 968   | Eira barbara           | Predator      | 238   | 12             | 3.97        | 0.487            | 0.439     | 0.540     | 5.59         | 0.000    | 215.79 | 0.000    | 0.001          |                      |
| Puma concolor | 968   | Mazama temama          | Prey          | 648   | 10             | 10.81       | 0.775            | 0.733     | 0.816     | 1.97         | 0.000    | 73.20  | 0.000    | 0.001          |                      |
| Puma concolor | 968   | Tamandua mexicana      | Prey          | 123   | 7              | 2.05        | 0.735            | 0.662     | 0.810     | 1.08         | 0.000    | 42.69  | 0.000    | 0.001          |                      |
| Puma concolor | 968   | Sylvilagus dicei       | Prey          | 1300  | 6              | 21.70       | 0.700            | 0.670     | 0.729     | 4.23         | 0.000    | 119.05 | 0.000    | 0.001          |                      |
| Puma concolor | 968   | Philander opossum      | Prey          | 156   | 9              | 2.59        | 0.699            | 0.650     | 0.746     | 1.25         | 0.000    | 45.16  | 0.000    | 0.001          |                      |
| Puma concolor | 968   | Conepatus semistriatus | Prey          | 247   | 9              | 4.12        | 0.688            | 0.644     | 0.736     | 2.18         | 0.000    | 81.90  | 0.000    | 0.001          |                      |
| Puma concolor | 968   | Procyon lotor          | Prey          | 486   | 8              | 8.11        | 0.681            | 0.641     | 0.715     | 2.10         | 0.000    | 43.69  | 0.000    | 0.001          |                      |
| Puma concolor | 968   | Didelphis marsupialis  | Prey          | 745   | 11             | 12.43       | 0.680            | 0.647     | 0.713     | 4.71         | 0.000    | 160.42 | 0.000    | 0.001          |                      |
| Puma concolor | 968   | Dasypus novemcitus     | Prey          | 313   | 11             | 5.22        | 0.664            | 0.625     | 0.702     | 2.66         | 0.000    | 92.59  | 0.000    | 0.001          |                      |
| Puma concolor | 968   | Cuniculus paca         | Prey          | 1853  | 11             | 30.93       | 0.629            | 0.599     | 0.659     | 7.98         | 0.000    | 238.94 | 0.000    | 0.001          | 1 Prey               |
| Puma concolor | 968   | Pecari tajacu          | Prey          | 1670  | 11             | 27.84       | 0.615            | 0.582     | 0.649     | 10.49        | 0.000    | 402.34 | 0.000    | 0.001          | 2 Prey               |
| Puma concolor | 968   | Odocoileus virginianus | Prey          | 333   | 7              | 5.56        | 0.614            | 0.561     | 0.664     | 4.12         | 0.000    | 160.59 | 0.000    | 0.001          |                      |
| Puma concolor | 968   | Dasyprocta punctata    | Prey          | 2314  | 9              | 38.62       | 0.456            | 0.427     | 0.484     | 20.67        | 0.000    | 700.92 | 0.000    | 0.001          |                      |
| Puma concolor | 968   | Nasua narica           | Prey          | 1180  | 12             | 19.69       | 0.455            | 0.422     | 0.484     | 18.27        | 0.000    | 691.24 | 0.000    | 0.001          |                      |

**Supplementary Data SD9-3.** — Overlap between ocelot (*Leopardus pardalis*) and potential intraguild competitors (Predator) and prey species (Prey) for all sites, listed in order of the Overlap Estimate with Overall Relative Abundance Index (RAI) and 3 measures of significance (Watson's  $U^2$ ,  $W_r$ , Fisher's Exact Test). Predicted primary and secondary competing predators and prey species are listed under Primary Interactions. Only documented prey species are listed (Supplemental Data SD1-2). Based on overlap and RAI, Dice's cottontail (*Sylvilagus dicei*) and paca (*Cuniculus paca*) are predicted to be the main prey of ocelot, and coyote (*Canis latrans*) and puma (*Puma concolor*) are predicted to be the most important competitors.

| Species-1          | $N_1$ | Species- 2               | Predator<br>Prey | $N_2$ | Sites<br>Recorded | Overall<br>RAI | Overlap<br>Estimate | 95%<br>Lower | 95%<br>Upper | Watson<br>$U^2$ | P- $U^2$ | $W_r$  | P- $W_r$ | Fisher's<br>Exact | Primary<br>Interactions |
|--------------------|-------|--------------------------|------------------|-------|-------------------|----------------|---------------------|--------------|--------------|-----------------|----------|--------|----------|-------------------|-------------------------|
| Leopardus pardalis | 590   | L. tigrinus oncella      | Predator         | 197   | 11                | 3.29           | 0.913               | 0.867        | 0.955        | 0.07            | 0.508    | 3.02   | 0.599    | 0.299             |                         |
| Leopardus pardalis | 590   | Canis latrans            | Predator         | 2853  | 9                 | 47.46          | 0.885               | 0.853        | 0.916        | 0.70            | 0.000    | 22.98  | 0.000    | 0.001             | 1 Competitor            |
| Leopardus pardalis | 590   | Puma concolor            | Predator         | 968   | 10                | 16.07          | 0.804               | 0.766        | 0.844        | 1.28            | 0.000    | 40.41  | 0.000    | 0.001             | 2 Competitor            |
| Leopardus pardalis | 590   | Leopardus wiedii         | Predator         | 27    | 8                 | 0.45           | 0.793               | 0.647        | 0.919        | 0.17            | 0.065    | 7.45   | 0.072    | 0.154             |                         |
| Leopardus pardalis | 590   | Panthera onca            | Predator         | 106   | 7                 | 1.77           | 0.572               | 0.488        | 0.653        | 2.20            | 0.000    | 78.18  | 0.000    | 0.001             |                         |
| Leopardus pardalis | 590   | Herpailurus yagouaroundi | Predator         | 26    | 6                 | 0.43           | 0.400               | 0.254        | 0.550        | 0.88            | 0.000    | 28.41  | 0.000    | 0.001             |                         |
| Leopardus pardalis | 590   | Eira barbara             | Predator         | 238   | 12                | 3.97           | 0.283               | 0.237        | 0.334        | 8.65            | 0.000    | 319.59 | 0.000    | 0.001             |                         |
| Leopardus pardalis | 590   | Philander opossum        | Prey             | 156   | 9                 | 2.59           | 0.870               | 0.812        | 0.921        | 0.27            | 0.010    | 10.41  | 0.021    | 0.012             |                         |
| Leopardus pardalis | 590   | Didelphis marsupialis    | Prey             | 745   | 11                | 12.43          | 0.856               | 0.815        | 0.892        | 1.07            | 0.000    | 39.29  | 0.000    | 0.001             |                         |
| Leopardus pardalis | 590   | Sylvilagus dicei         | Prey             | 1300  | 6                 | 21.70          | 0.845               | 0.811        | 0.873        | 0.46            | 0.000    | 12.22  | 0.004    | 0.001             | 1 Prey                  |
| Leopardus pardalis | 590   | Tamandua mexicana        | Prey             | 123   | 7                 | 2.05           | 0.840               | 0.766        | 0.903        | 0.39            | 0.001    | 16.84  | 0.001    | 0.048             |                         |
| Leopardus pardalis | 590   | Dasypus novemcinctus     | Prey             | 313   | 11                | 5.22           | 0.833               | 0.784        | 0.876        | 0.73            | 0.000    | 24.96  | 0.000    | 0.001             |                         |
| Leopardus pardalis | 590   | Procyon lotor            | Prey             | 486   | 8                 | 8.11           | 0.828               | 0.784        | 0.876        | 0.31            | 0.004    | 6.65   | 0.096    | 0.001             |                         |
| Leopardus pardalis | 590   | Cuniculus paca           | Prey             | 1853  | 11                | 30.93          | 0.804               | 0.766        | 0.839        | 1.87            | 0.000    | 57.36  | 0.000    | 0.001             | 2 Prey                  |
| Leopardus pardalis | 590   | Mazama temama            | Prey             | 648   | 10                | 10.81          | 0.592               | 0.546        | 0.638        | 5.04            | 0.000    | 181.88 | 0.000    | 0.001             |                         |
| Leopardus pardalis | 590   | Pecari tajacu            | Prey             | 1670  | 11                | 27.84          | 0.413               | 0.379        | 0.448        | 15.61           | 0.000    | 596.89 | 0.000    | 0.001             |                         |
| Leopardus pardalis | 590   | Dasyprocta punctata      | Prey             | 2314  | 9                 | 38.62          | 0.256               | 0.223        | 0.287        | 25.80           | 0.000    | 857.94 | 0.000    | 0.001             |                         |
| Leopardus pardalis | 590   | Nasua narica             | Prey             | 1180  | 12                | 19.69          | 0.252               | 0.216        | 0.285        | 23.02           | 0.000    | 850.63 | 0.000    | 0.001             |                         |

**Supplementary Data SD9-4.** — Overlap between coyote (*Canis latrans*) and potential intraguild competitors (Predator) and prey species (Prey) for all sites, listed in order of the Overlap Estimate with Overall Relative Abundance Index (RAI) and 3 measures of significance (Watson's  $U^2$ ,  $W_r$ , Fisher's Exact Test). Predicted primary and secondary competing predators and prey species are listed under Primary Interactions. Only documented prey species are listed (Supplemental Data SD1-2). Based on overlap and RAI, Dice's cottontail (*Sylvilagus dicei*) and collared peccary (*Pecari tajacu*) are predicted to be the main prey of coyote, and puma (*Puma concolor*) and ocelot (*Leopardus pardalis*) are predicted to be the most important competitors.

| Species-1     | $N_1$ | Species- 2             | Predator<br>Prey | $N_2$ | Sites<br>Recorded | Overall<br>RAI | Overlap<br>Estimate | 95%<br>Lower | 95%<br>Upper | Watson<br>$U^2$ | P- $U^2$ | $W_r$   | P- $W_r$ | Fisher's<br>Exact | Primary<br>Interactions |
|---------------|-------|------------------------|------------------|-------|-------------------|----------------|---------------------|--------------|--------------|-----------------|----------|---------|----------|-------------------|-------------------------|
| Canis latrans | 2853  | Puma concolor          | Predator         | 968   | 10                | 16.07          | 0.896               | 0.869        | 0.922        | 0.97            | 0.000    | 31.31   | 0.000    | 0.001             | 1 Competitor            |
| Canis latrans | 2853  | Leopardus pardalis     | Predator         | 590   | 12                | 9.83           | 0.885               | 0.852        | 0.917        | 0.70            | 0.000    | 22.98   | 0.000    | 0.001             | 2 Competitor            |
| Canis latrans | 2853  | L. tigrinus oncilla    | Predator         | 197   | 11                | 3.29           | 0.878               | 0.827        | 0.922        | 0.19            | 0.051    | 5.96    | 0.149    | 0.093             |                         |
| Canis latrans | 2853  | Leopardus wiedii       | Predator         | 27    | 8                 | 0.45           | 0.799               | 0.655        | 0.925        | 0.18            | 0.060    | 7.02    | 0.100    | 0.341             |                         |
| Canis latrans | 2853  | Panthera onca          | Predator         | 106   | 7                 | 1.77           | 0.660               | 0.578        | 0.741        | 1.76            | 0.000    | 62.51   | 0.000    | 0.001             |                         |
| Canis latrans | 2853  | Herpailurus yaguarondi | Predator         | 26    | 6                 | 0.43           | 0.503               | 0.358        | 0.656        | 0.68            | 0.000    | 23.40   | 0.000    | 0.001             |                         |
| Canis latrans | 2853  | Eira barbara           | Predator         | 238   | 12                | 3.97           | 0.393               | 0.349        | 0.438        | 9.08            | 0.000    | 308.80  | 0.000    | 0.001             |                         |
| Canis latrans | 2853  | Sylvilagus dicei       | Prey             | 1300  | 6                 | 21.70          | 0.766               | 0.746        | 0.787        | 3.97            | 0.000    | 119.24  | 0.000    | 0.001             | 1 Prey                  |
| Canis latrans | 2853  | Dasypus novemcitus     | Prey             | 313   | 11                | 5.22           | 0.738               | 0.705        | 0.767        | 2.17            | 0.000    | 75.39   | 0.000    | 0.001             |                         |
| Canis latrans | 2853  | Mazama temama          | Prey             | 648   | 10                | 10.81          | 0.673               | 0.630        | 0.714        | 5.74            | 0.000    | 182.42  | 0.000    | 0.001             |                         |
| Canis latrans | 2853  | Odocoileus virginianus | Prey             | 333   | 7                 | 5.56           | 0.519               | 0.475        | 0.568        | 8.03            | 0.000    | 278.74  | 0.000    | 0.001             |                         |
| Canis latrans | 2853  | Pecari tajacu          | Prey             | 1670  | 11                | 27.84          | 0.518               | 0.492        | 0.543        | 29.09           | 0.000    | 1122.96 | 0.000    | 0.001             | 2 Prey                  |
| Canis latrans | 2853  | Nasua narica           | Prey             | 1180  | 12                | 19.69          | 0.363               | 0.341        | 0.386        | 39.24           | 0.000    | 1512.81 | 0.000    | 0.001             |                         |

**Supplementary Data SD9-5.** — Overlap between jaguarundi (*Herpailurus yaguarondi*) and potential intraguild competitors (Predator) and prey species (Prey) for all sites, listed in order of the Overlap Estimate with Overall Relative Abundance Index (RAI) and 3 measures of significance (Watson's  $U^2$ ,  $W_r$ , Fisher's Exact Test). Predicted primary and secondary competing predators and prey species are listed under Primary Interactions. Only documented prey species are listed (Supplemental Data SD1-2). Based on overlap and RAI, agouti (*Dasyprocta punctata*) is predicted to be the main prey of jaguarundi, and coyote (*Canis latrans*) and puma (*Puma concolor*) are predicted to be the most important competitors.

| Species-1              | $N_1$ | Species- 2            | Predator<br>Prey | $N_2$ | Sites<br>Recorded | Overall<br>RAI | Overlap<br>Estimate | 95%<br>Lower | 95%<br>Upper | Watson<br>$U^2$ | P- $U^2$ | $W_r$ | P- $W_r$ | Fisher's<br>Exact | Primary<br>Interactions |
|------------------------|-------|-----------------------|------------------|-------|-------------------|----------------|---------------------|--------------|--------------|-----------------|----------|-------|----------|-------------------|-------------------------|
| Herpailurus yaguarondi | 26    | Eira barbara          | Predator         | 238   | 12                | 3.97           | 0.817               | 0.684        | 0.927        | 0.08            | 0.421    | 4.28  | 0.337    | 0.136             |                         |
| Herpailurus yaguarondi | 26    | Panthera onca         | Predator         | 106   | 7                 | 1.77           | 0.788               | 0.655        | 0.908        | 0.12            | 0.193    | 4.78  | 0.252    | 0.568             |                         |
| Herpailurus yaguarondi | 26    | Puma concolor         | Predator         | 968   | 10                | 16.07          | 0.588               | 0.457        | 0.731        | 0.46            | 0.000    | 18.37 | 0.000    | 0.005             | 1 Competitor            |
| Herpailurus yaguarondi | 26    | Canis latrans         | Predator         | 2853  | 9                 | 47.46          | 0.503               | 0.368        | 0.662        | 0.68            | 0.000    | 23.40 | 0.000    | 0.001             | 2 Competitor            |
| Herpailurus yaguarondi | 26    | L. tigrinus oncilla   | Predator         | 197   | 11                | 3.29           | 0.457               | 0.310        | 0.617        | 0.69            | 0.000    | 25.36 | 0.000    | 0.001             |                         |
| Herpailurus yaguarondi | 26    | Leopardus pardalis    | Predator         | 590   | 12                | 9.83           | 0.400               | 0.262        | 0.552        | 0.88            | 0.000    | 28.41 | 0.000    | 0.001             |                         |
| Herpailurus yaguarondi | 26    | Leopardus wiedii      | Predator         | 27    | 8                 | 0.45           | 0.398               | 0.200        | 0.586        | 0.52            | 0.000    | 21.41 | 0.000    | 0.001             |                         |
| Herpailurus yaguarondi | 26    | Dasyprocta punctata   | Prey             | 2314  | 9                 | 38.62          | 0.753               | 0.618        | 0.860        | 0.10            | 0.265    | 4.93  | 0.235    | 0.032             | 1 Prey                  |
| Herpailurus yaguarondi | 26    | Mazama temama         | Prey             | 648   | 10                | 10.81          | 0.716               | 0.581        | 0.839        | 0.18            | 0.062    | 6.77  | 0.098    | 0.186             |                         |
| Herpailurus yaguarondi | 26    | Philander opossum     | Prey             | 156   | 9                 | 2.59           | 0.294               | 0.147        | 0.447        | 1.11            | 0.000    | 34.94 | 0.000    | 0.001             |                         |
| Herpailurus yaguarondi | 26    | Didelphis marsupialis | Prey             | 745   | 11                | 12.43          | 0.272               | 0.132        | 0.418        | 1.32            | 0.000    | 36.71 | 0.000    | 0.001             |                         |
| Herpailurus yaguarondi | 26    | Cuniculus paca        | Prey             | 1853  | 11                | 30.93          | 0.236               | 0.102        | 0.384        | 1.39            | 0.000    | 36.47 | 0.000    | 0.001             | 2 Prey                  |

**Supplementary Data SD9-6.** — Overlap between tayra (*Eira barbara*) and potential intraguild competitors (Predator) and prey species (Prey) for all sites, listed in order of the Overlap Estimate with Overall Relative Abundance Index (RAI) and 3 measures of significance (Watson's  $U^2$ ,  $W_r$ , Fisher's Exact Test). Predicted primary and secondary competing predators and prey species are listed under Primary Interactions. Only documented prey species are listed (Supplemental Data SD1-2). Based on overlap and RAI, coati (*Nasua narica*) and agouti (*Dasyprocta punctata*) are predicted to be the main prey of tayra, and coyote (*Canis latrans*) and puma (*Puma concolor*) are predicted to be the most important competitors.

| Species-1    | $N_1$ | Species- 2             | Predator<br>Prey | $N_2$ | Sites<br>Recorded | Overall<br>RAI | Overlap<br>Estimate | 95%<br>Lower | 95%<br>Upper | Watson<br>$U^2$ | P- $U^2$ | $W_r$  | P- $W_r$ | Fisher's<br>Exact | Primary<br>Interactions |
|--------------|-------|------------------------|------------------|-------|-------------------|----------------|---------------------|--------------|--------------|-----------------|----------|--------|----------|-------------------|-------------------------|
| Eira barbara | 28    | Herpailurus yaguarondi | Predator         | 28    | 6                 | 0.43           | 0.829               | 0.696        | 0.937        | 0.09            | 0.344    | 4.58   | 0.286    | 0.279             |                         |
| Eira barbara | 259   | Panthera onca          | Predator         | 106   | 7                 | 1.77           | 0.696               | 0.607        | 0.781        | 0.74            | 0.000    | 25.72  | 0.000    | 0.000             |                         |
| Eira barbara | 259   | Puma concolor          | Predator         | 969   | 10                | 16.07          | 0.489               | 0.441        | 0.538        | 6.04            | 0.000    | 233.59 | 0.000    | 0.000             | 2 Competitor            |
| Eira barbara | 259   | Canis latrans          | Predator         | 2855  | 9                 | 47.46          | 0.396               | 0.353        | 0.441        | 9.83            | 0.000    | 334.85 | 0.000    | 0.000             | 1 Competitor            |
| Eira barbara | 259   | L. tigrinus oncilla    | Predator         | 199   | 11                | 3.29           | 0.345               | 0.281        | 0.412        | 4.90            | 0.000    | 189.56 | 0.000    | 0.000             |                         |
| Eira barbara | 259   | Leopardus pardalis     | Predator         | 592   | 8                 | 9.83           | 0.291               | 0.245        | 0.340        | 9.15            | 0.000    | 341.11 | 0.000    | 0.000             |                         |
| Eira barbara | 259   | Leopardus wiedii       | Predator         | 27    | 12                | 0.45           | 0.290               | 0.172        | 0.421        | 1.35            | 0.000    | 43.13  | 0.000    | 0.000             |                         |
| Eira barbara | 259   | Nasua narica           | Prey             | 1192  | 12                | 19.69          | 0.880               | 0.828        | 0.924        | 0.19            | 0.046    | 7.44   | 0.068    | 0.000             | 1 Prey                  |
| Eira barbara | 259   | Dasyprocta punctata    | Prey             | 2338  | 9                 | 38.62          | 0.800               | 0.748        | 0.850        | 0.62            | 0.000    | 24.42  | 0.000    | 0.000             | 2 Prey                  |
| Eira barbara | 259   | Sylvilagus dicei       | Prey             | 1301  | 6                 | 21.70          | 0.186               | 0.145        | 0.229        | 13.85           | 0.000    | 430.32 | 0.000    | 0.000             |                         |
| Eira barbara | 259   | Philander opossum      | Prey             | 177   | 9                 | 2.59           | 0.182               | 0.131        | 0.236        | 6.66            | 0.000    | 259.44 | 0.000    | 0.000             |                         |
| Eira barbara | 259   | Didelphis marsupialis  | Prey             | 745   | 11                | 12.43          | 0.169               | 0.130        | 0.210        | 12.61           | 0.000    | 431.18 | 0.000    | 0.000             |                         |
| Eira barbara | 259   | Cuniculus paca         | Prey             | 1855  | 11                | 30.93          | 0.137               | 0.100        | 0.175        | 15.09           | 0.000    | 445.57 | 0.000    | 0.000             |                         |

**Supplementary Data SD9-7.** — Overlap between margay (*Leopardus wiedii*) and potential intraguild competitors (Predator) and prey species (Prey) for all sites, listed in order of the Overlap Estimate with Overall Relative Abundance Index (RAI) and 3 measures of significance (Watson's  $U^2$ ,  $W_r$ , Fisher's Exact Test). Predicted primary and secondary competing predators and prey species are listed under Primary Interactions. Only documented prey species are listed (Supplemental Data SD1-2). Based on overlap and RAI, Dice's cottontail (*Sylvilagus dicei*) and common opossum

(*Didelphis marsupialis*) are predicted to be the main prey of margay, and coyote (*Canis latrans*), puma (*Puma concolor*), and ocelot (*Leopardus pardalis*) are predicted to be the most important competitors. Note that many prey items recorded for margay consists of small rodents that cannot be accurately recorded by camera traps.

| Species-1        | $N_1$ | Species- 2             | Predator<br>Prey | $N_2$ | Sites<br>Recorded | Overall<br>RAI | Overlap<br>Estimate | 95%<br>Lower | 95%<br>Upper | Watson<br>$U^2$ | P- $U^2$ | $W_r$ | P- $W_r$ | Fisher's<br>Exact | Primary<br>Interactions |
|------------------|-------|------------------------|------------------|-------|-------------------|----------------|---------------------|--------------|--------------|-----------------|----------|-------|----------|-------------------|-------------------------|
| Leopardus wiedii | 27    | Canis latrans          | Predator         | 2853  | 12                | 47.46          | 0.799               | 0.648        | 0.922        | 0.18            | 0.060    | 7.02  | 0.080    | 0.323             | 1 Competitor            |
| Leopardus wiedii | 27    | Leopardus pardalis     | Predator         | 590   | 11                | 9.83           | 0.793               | 0.644        | 0.913        | 0.17            | 0.065    | 7.45  | 0.059    | 0.175             | 2 Competitor            |
| Leopardus wiedii | 27    | L. tigrinus oncilla    | Predator         | 197   | 10                | 3.29           | 0.779               | 0.614        | 0.912        | 0.17            | 0.066    | 7.14  | 0.073    | 0.280             |                         |
| Leopardus wiedii | 27    | Puma concolor          | Predator         | 968   | 7                 | 16.07          | 0.720               | 0.580        | 0.848        | 0.30            | 0.006    | 11.27 | 0.011    | 0.023             |                         |
| Leopardus wiedii | 27    | Panthera onca          | Predator         | 106   | 6                 | 1.77           | 0.510               | 0.362        | 0.655        | 0.71            | 0.000    | 28.63 | 0.000    | 0.001             |                         |
| Leopardus wiedii | 27    | Herpailurus yaguarondi | Predator         | 26    | 12                | 0.43           | 0.398               | 0.217        | 0.582        | 0.52            | 0.000    | 21.41 | 0.000    | 0.002             |                         |
| Leopardus wiedii | 27    | Eira barbara           | Predator         | 238   |                   | 3.97           | 0.286               | 0.166        | 0.415        | 1.36            | 0.000    | 43.94 | 0.000    | 0.001             |                         |
|                  |       |                        |                  |       | 6                 |                |                     |              |              |                 |          |       |          |                   |                         |
| Leopardus wiedii | 27    | Sylvilagus dicei       | Prey             | 1300  | 11                | 21.70          | 0.725               | 0.568        | 0.861        | 0.20            | 0.042    | 7.32  | 0.068    | 0.002             | 1 Prey                  |
| Leopardus wiedii | 27    | Didelphis marsupialis  | Prey             | 745   | 9                 | 12.43          | 0.688               | 0.532        | 0.847        | 0.29            | 0.006    | 9.68  | 0.016    | 0.007             | 2 Prey                  |
| Leopardus wiedii | 27    | Philander opossum      | Prey             | 156   | 7                 | 2.59           | 0.687               | 0.526        | 0.833        | 0.27            | 0.010    | 10.38 | 0.015    | 0.021             |                         |
| Leopardus wiedii | 27    | Odocoileus virginianus | Prey             | 333   | 9                 | 5.56           | 0.401               | 0.280        | 0.533        | 1.06            | 0.000    | 36.92 | 0.000    | 0.001             |                         |
| Leopardus wiedii | 27    | Dasyprocta punctata    | Prey             | 2314  | 12                | 38.62          | 0.272               | 0.145        | 0.405        | 1.60            | 0.000    | 42.44 | 0.000    | 0.001             |                         |

**Supplementary Data SD9-8.** — Overlap between oncilla (*Leopardus tigrinus oncilla*) and potential intraguild competitors (Predator) and prey species (Prey) for all sites, listed in order of the Overlap Estimate with Overall Relative Abundance Index (RAI) and 3 measures of significance (Watson's  $U^2$ ,  $W_r$ , Fisher's Exact Test). Predicted primary and secondary competing predators and prey species are listed under Primary Interactions. Only documented prey species are listed (Supplemental Data SD1-2). Based on overlap and RAI, Dice's cottontail (*Sylvilagus dicei*) and paca (*Cuniculus paca*) are predicted to be the main prey of oncilla, and coyote (*Canis latrans*), puma (*Puma concolor*), and ocelot (*Leopardus pardalis*) are predicted to be the most important competitors. Note that many prey items recorded for oncilla consists of small rodents that cannot be accurately recorded by camera traps.

| Species-1           | $N_1$ | Species- 2             | Predator<br>Prey | $N_2$ | Sites<br>Recorded | Overall<br>RAI | Overlap<br>Estimate | 95%<br>Lower | 95%<br>Upper | Watson<br>$U^2$ | P- $U^2$ | $W_r$  | P- $W_r$ | Fisher's<br>Exact | Primary<br>Interactions |
|---------------------|-------|------------------------|------------------|-------|-------------------|----------------|---------------------|--------------|--------------|-----------------|----------|--------|----------|-------------------|-------------------------|
| L. tigrinus oncilla | 197   | Leopardus pardalis     | Predator         | 590   | 12                | 9.83           | 0.913               | 0.867        | 0.954        | 0.07            | 0.508    | 3.02   | 0.596    | 0.315             | 2 Competitor            |
| L. tigrinus oncilla | 197   | Canis latrans          | Predator         | 2853  | 9                 | 47.46          | 0.878               | 0.833        | 0.923        | 0.19            | 0.051    | 5.96   | 0.159    | 0.092             | 1 Competitor            |
| L. tigrinus oncilla | 197   | Puma concolor          | Predator         | 968   | 10                | 16.07          | 0.862               | 0.806        | 0.915        | 0.30            | 0.005    | 10.79  | 0.011    | 0.055             |                         |
| L. tigrinus oncilla | 197   | Leopardus wiedii       | Predator         | 27    | 8                 | 0.45           | 0.779               | 0.626        | 0.917        | 0.17            | 0.066    | 7.14   | 0.091    | 0.267             |                         |
| L. tigrinus oncilla | 197   | Panthera onca          | Predator         | 106   | 7                 | 1.77           | 0.631               | 0.540        | 0.723        | 1.29            | 0.000    | 51.52  | 0.000    | 0.001             |                         |
| L. tigrinus oncilla | 197   | Herpailurus yaguarondi | Predator         | 26    | 6                 | 0.43           | 0.457               | 0.310        | 0.623        | 0.69            | 0.000    | 25.36  | 0.000    | 0.001             |                         |
| L. tigrinus oncilla | 197   | Eira barbara           | Predator         | 238   | 12                | 3.97           | 0.344               | 0.277        | 0.415        | 4.64            | 0.000    | 179.55 | 0.000    | 0.001             |                         |
| L. tigrinus oncilla | 197   | Philander opossum      | Prey             | 156   | 9                 | 2.59           | 0.823               | 0.748        | 0.885        | 0.32            | 0.003    | 11.37  | 0.008    | 0.002             |                         |
| L. tigrinus oncilla | 197   | Sylvilagus dicei       | Prey             | 1300  | 6                 | 21.70          | 0.821               | 0.767        | 0.870        | 0.41            | 0.001    | 12.01  | 0.002    | 0.001             | 1 Prey                  |
| L. tigrinus oncilla | 197   | Didelphis marsupialis  | Prey             | 745   | 11                | 12.43          | 0.805               | 0.743        | 0.861        | 0.82            | 0.000    | 28.16  | 0.000    | 0.001             |                         |
| L. tigrinus oncilla | 197   | Cuniculus paca         | Prey             | 1853  | 11                | 30.93          | 0.752               | 0.690        | 0.814        | 1.14            | 0.000    | 32.79  | 0.000    | 0.001             | 2 Prey                  |
| L. tigrinus oncilla | 197   | Nasua narica           | Prey             | 1180  | 12                | 19.69          | 0.314               | 0.260        | 0.370        | 8.42            | 0.000    | 265.43 | 0.000    | 0.001             |                         |
