# Supplementary material for: Circadian activity patterns of mammalian predators and prey in Costa Rica
Source: PubMed Central journal article supplement — J Mammal. 2020 Oct 3;101(5):1313–31. doi: 10.1093/jmammal/gyaa103 (PMC7733402; doi:10.1093/jmammal/gyaa103), 2020-10-03
Supplement: gyaa103_suppl_supplementary_data_10.pdf [file gyaa103_suppl_supplementary_data_10.pdf]

# Jaguar activity patterns across sites

Temporal Density

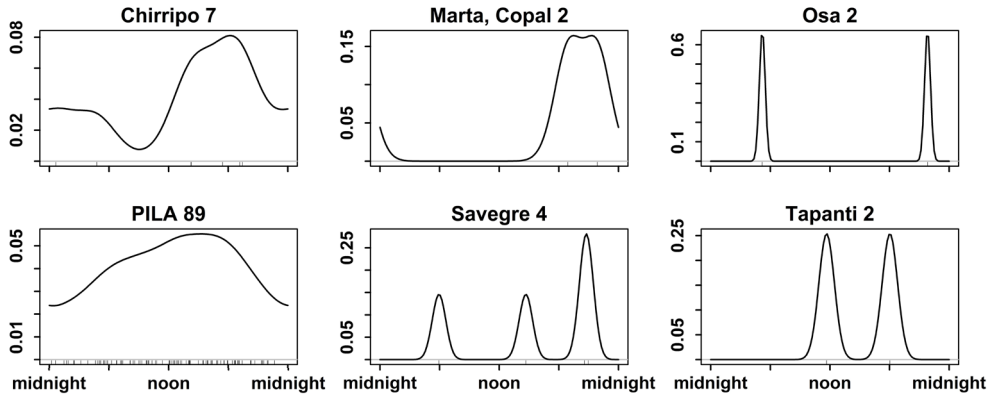

Time of Day

**Supplementary Data SD10-1.** Comparison of circadian activity density for jaguar (*Panthera onca*) across 6 survey sites. The sample size of independent records appears to the right of the survey site above the frame. Abbreviations: Chirripo = Chirripo National Park; Marta, Copal = La Marta National Wildlife Refuge and El Copal Reserve; Osa = Proyecto Campanario Biological Station, Osa Peninsula; PILA = La Amistad International Park; Savegre = Savegre Valley (Savegre Reserve and Los Quetzales National Park); Tapantí = Tapantí Macizo de la Muerte National Park. Jaguar exhibited a cathemeral activity pattern at all the survey sites.

## Puma activity patterns across sites

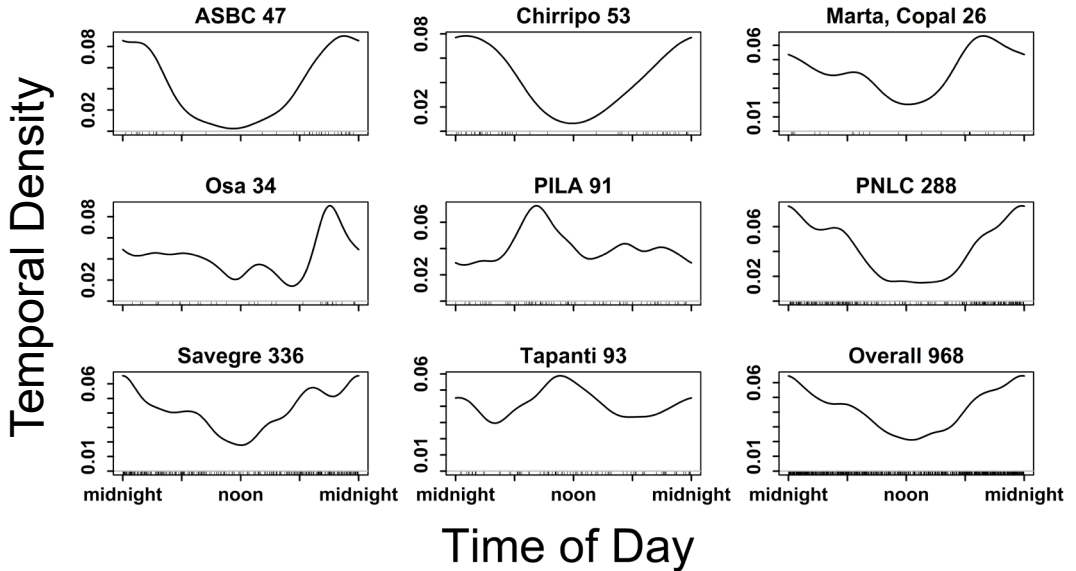

**Supplementary Data SD10-2.** Comparison of circadian activity density for puma (*Puma concolor*) across 8 survey sites. The sample size of independent records appears to the right of the survey site above the frame. Abbreviations: ASBC = Alexander Skutch Biological Corridor; Chirripo = Chirripo National Park; Marta = La Marta National Wildlife Refuge; Osa = Proyecto Campanario Biological Station on Osa Peninsula; PILA = La Amistad International Park; PNLC = La Cangreja National Park; Savegre = Savegre Valley (Savegre Reserve and Los Quetzales National Park); Tapanti = Tapanti Macizo de la Muerte National Park; Overall = all survey sites. Puma at all sites exhibited a nadir in activity during noon except at Tapanti National Park, where diurnal brocket deer were especially abundant.

# Ocelot activity patterns across sites

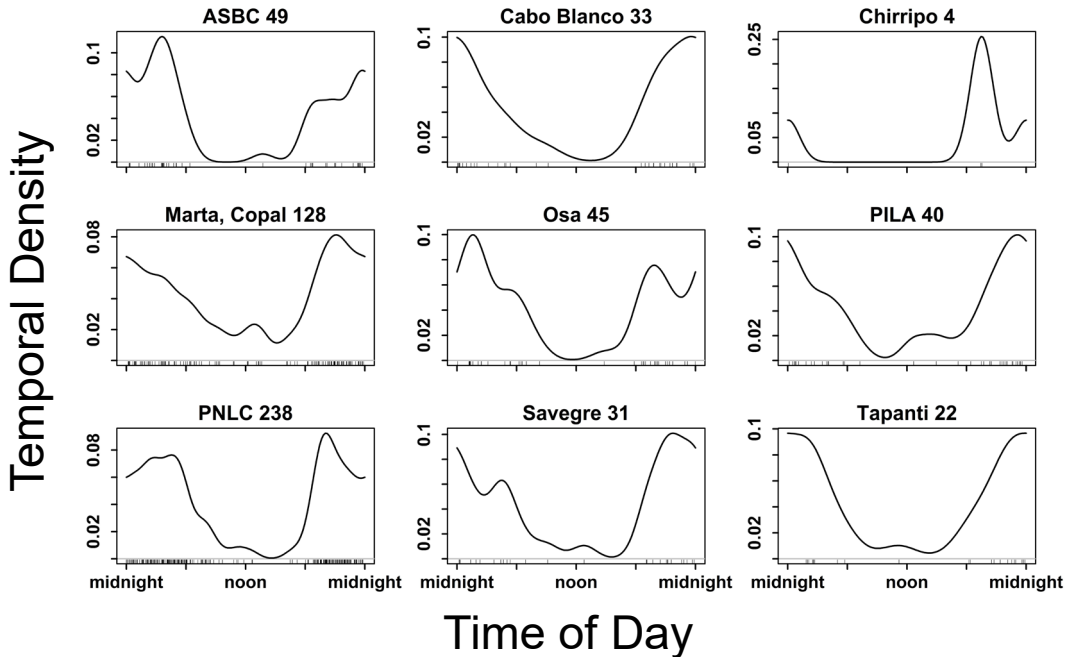

**Supplementary Data SD10-3.** Comparison of circadian activity density for ocelot (*Leopardus pardalis*) across 9 survey sites. The sample size of independent records appears to the right of the survey site above the frame. Abbreviations: ASBC = Alexander Skutch Biological Corridor; Cabo Blanco = Cabo Blanco National Park; Chirripo = Chirripo National Park; Marta, Copal = La Marta National Wildlife Refuge and El Copal Reserve; Osa = Proyecto Campanario Biological Station, Osa Peninsula; PILA = La Amistad International Park; PNLC = La Cangreja National Park; Savegre = Savegre Valley (Savegre Reserve and Los Quetzales National Park); Tapantí = Tapantí Macizo de la Muerte National Park. Ocelots at all sites exhibited a nocturnal activity pattern, often with a crepuscular activity peak.

# Coyote activity patterns across sites

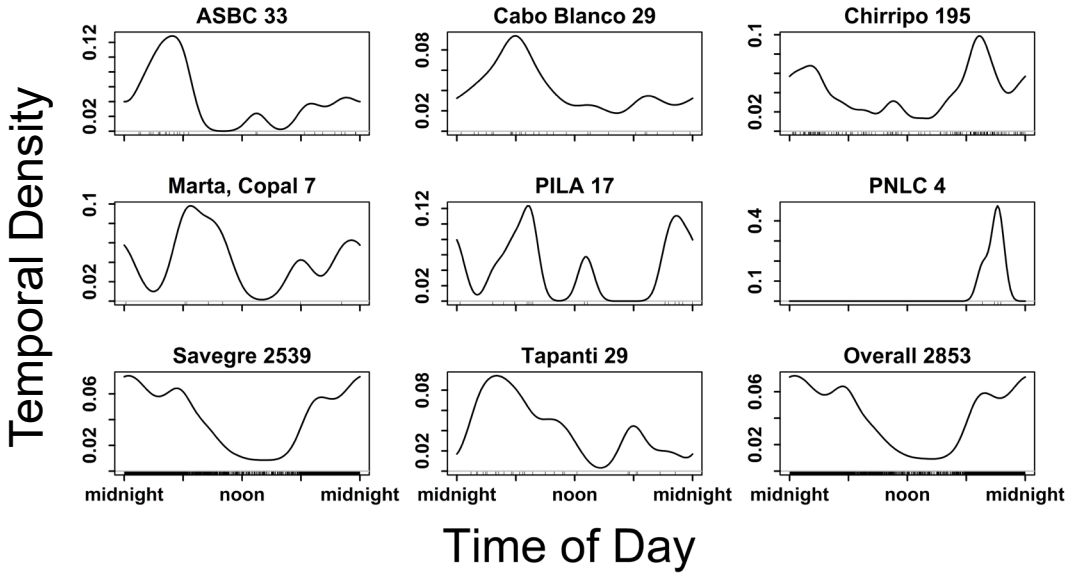

**Supplementary Data SD10-4.** Comparison of circadian activity density for coyote (*Canis latrans*) across 8 survey sites. The sample size of independent records appears to the right of the survey site above the frame. Abbreviations: ASBC = Alexander Skutch Biological Corridor; Cabo Blanco = Cabo Blanco National Park; Chirripo = Chirripo National Park; Marta = La Marta National Wildlife Refuge; PILA = La Amistad International Park; PNLC = La Cangreja National Park; Savegre = Savegre Valley (Savegre Reserve and Los Quetzales National Park); Tapantí = Tapantí Macizo de la Muerte National Park; Overall = all survey sites. Other than Savegre, coyote were not abundant at most survey sites.

# Jaguarundi activity patterns across sites

Temporal Density

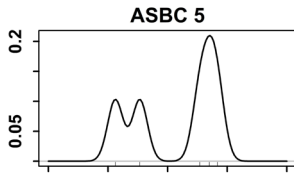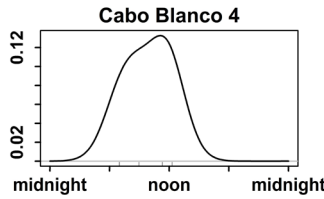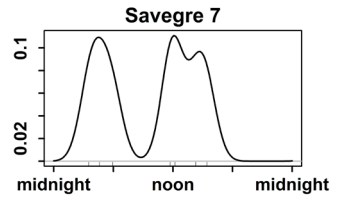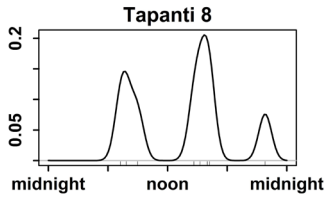

Time of Day

**Supplementary Data SD10-5.** Comparison of circadian activity density for jaguarundi (*Herpailurus yagouardi*) across 4 survey sites. The sample size of independent records appears to the right of the survey site above the frame. Abbreviations: ASBC = Alexander Skutch Biological Corridor; Cabo Blanco = Cabo Blanco National Park; Savegre = Savegre Valley (Savegre Reserve and Los Quetzales National Park); Tapantí = Tapantí Macizo de la Muerte National Park. Jaguarundi exhibited a diurnal activity pattern at all the survey sites.

# Tayra activity patterns across sites

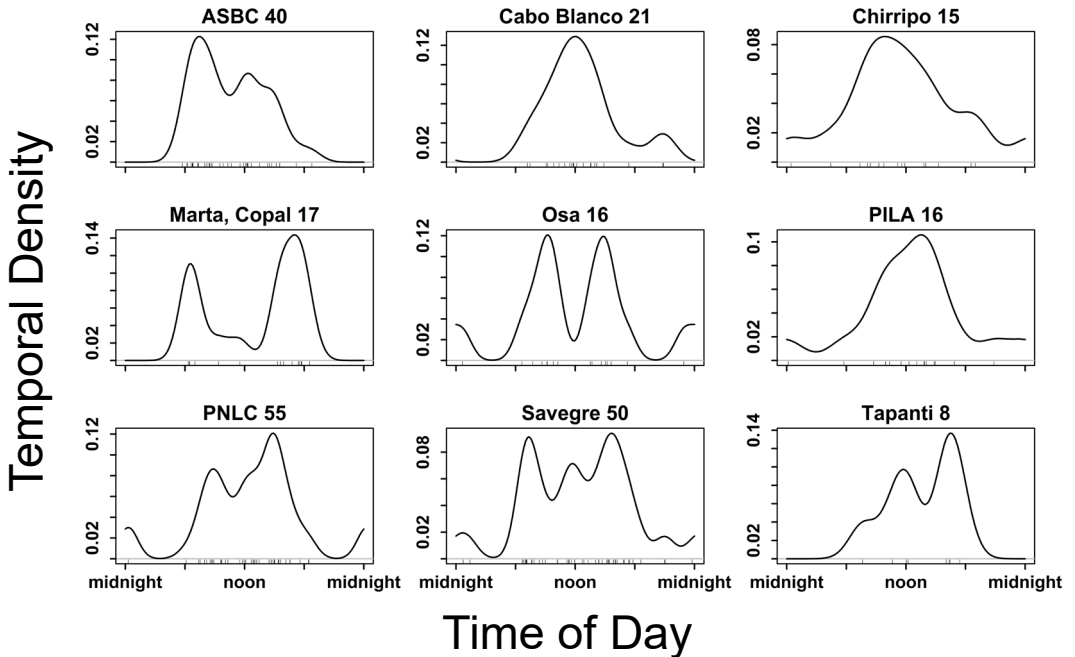

**Supplementary Data SD10-6.** Comparison of circadian activity density for tayra (*Eira barbara*) across 9 survey sites. The sample size of independent records appears to the right of the survey site above the frame. Abbreviations: ASBC = Alexander Skutch Biological Corridor; Cabo Blanco = Cabo Blanco National Park; Chirripo = Chirripo National Park; Marta, Copal = La Marta National Wildlife Refuge and El Copal Reserve; Osa = Proyecto Campanario Biological Station, Osa Peninsula; PILA = La Amistad International Park; PNLC = La Cangreja National Park; Savegre = Savegre Valley (Savegre Reserve and Los Quetzales National Park); Tapanti = Tapanti Macizo de la Muerte National Park. Tayras exhibited a diurnal activity pattern, often with crepuscular peaks and reduction in activity at midday.

# Margay activity patterns across sites

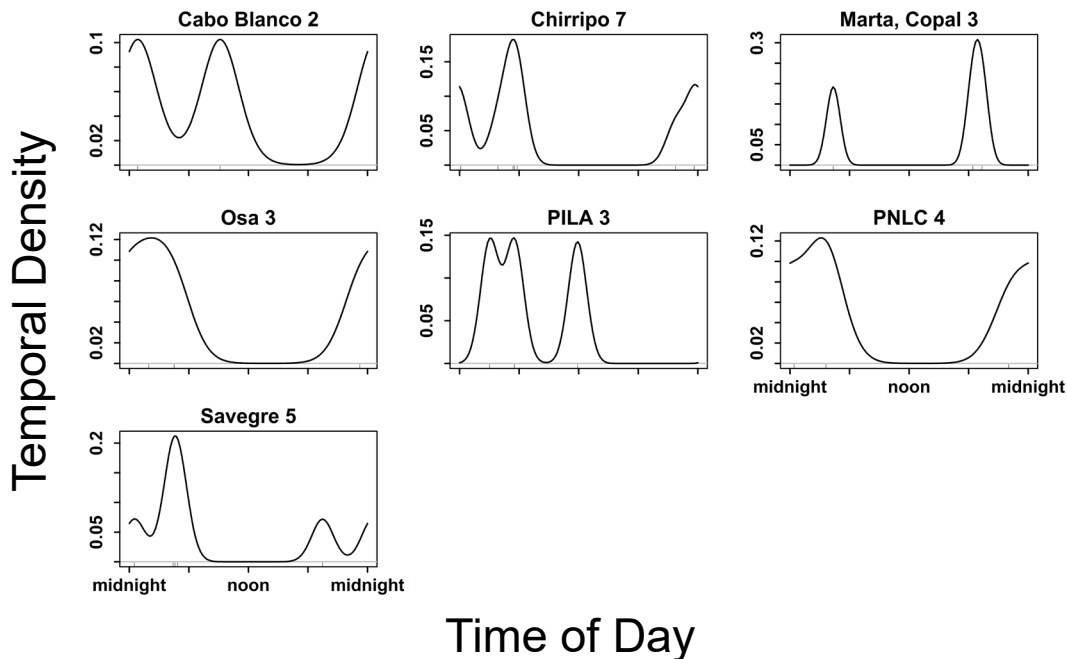

**Supplementary Data SD10-7.** Comparison of circadian activity density for margay (*Leopardus wiedii*) across 7 survey sites. The sample size of independent records appears to the right of the survey site above the frame. Abbreviations: Cabo Blanco = Cabo Blanco National Park; Chirripo = Chirripo National Park; Marta, Copal = La Marta National Wildlife Refuge and El Copal Reserve; Osa = Proyecto Campanario Biological Station, Osa Peninsula; PILA = La Amistad International Park; PNLC = La Cangreja National Park; Savegre = Savegre Valley (Savegre Reserve and Los Quetzales National Park). Margay exhibited a mostly nocturnal activity pattern with midday activity at some sites.

# Oncilla activity patterns across sites

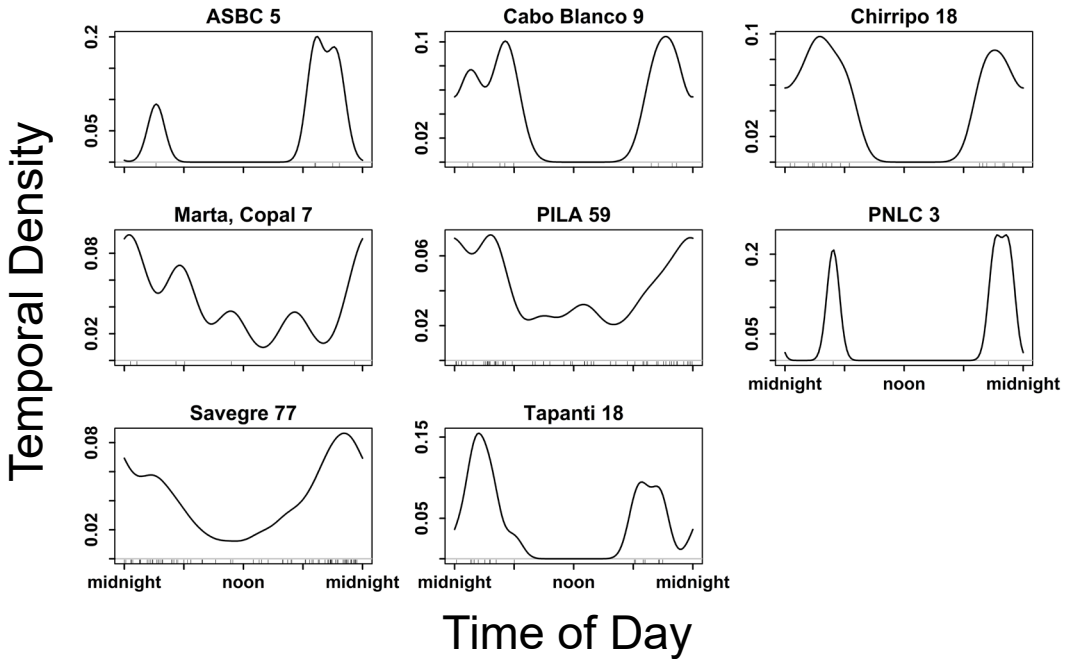

**Supplementary Data SD10-8.** Comparison of circadian activity density for oncilla (*Leopardus tigrinus oncilla*) across 8 survey sites. The sample size of independent records appears to the right of the survey site above the frame. Abbreviations: ASBC = Alexander Skutch Biological Corridor; Cabo Blanco = Cabo Blanco National Park; Chirripo = Chirripo National Park; Marta, Copal = La Marta National Wildlife Refuge and El Copal Reserve; PILA = La Amistad International Park; PNLC = La Cangreja National Park; Savegre = Savegre Valley (Savegre Reserve and Los Quetzales National Park); Tapantí = Tapantí Macizo de la Muerte National Park. Oncilla exhibited a nocturnal activity pattern with crepuscular activity.



# Porcupine activity patterns across sites

Temporal Density

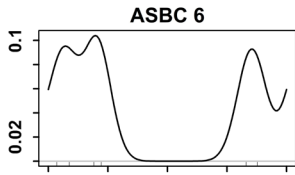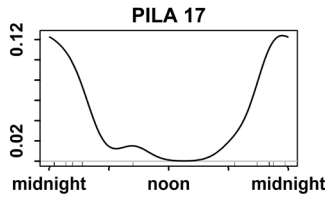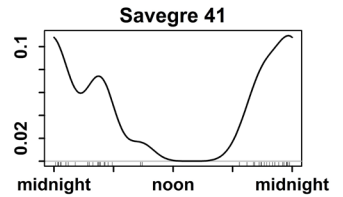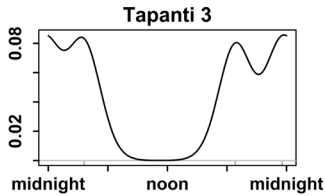

Time of Day

**Supplementary Data SD10-9.** Comparison of circadian activity density for Mexican hairy porcupine (*Coendou mexicanus*) across 4 survey sites. The sample size of independent records appears to the right of the survey site above the frame. Abbreviations: ASBC = Alexander Skutch Biological Corridor; PILA = La Amistad International Park; Savegre = Savegre Valley (Savegre Reserve and Los Quetzales National Park); Tapantí = Tapantí Macizo de la Muerte National Park. Porcupine exhibited a nocturnal activity pattern at all survey sites.

# Skunk activity patterns across sites

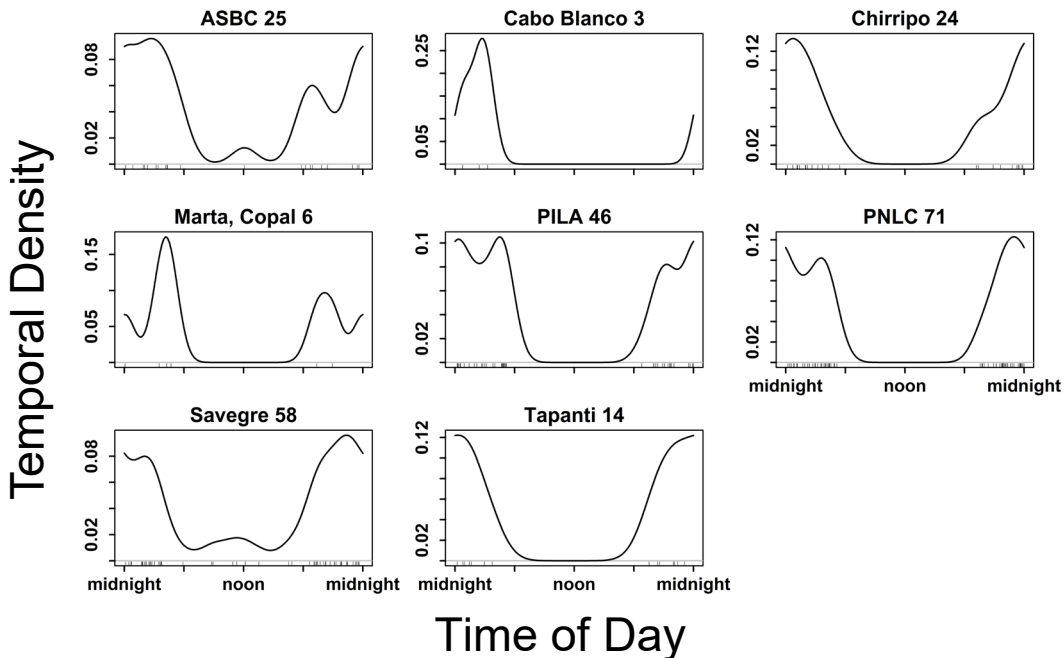

**Supplementary Data SD10-10.** Comparison of circadian activity density for striped hog-nosed skunk (*Conepatus semistriatus*) across 8 survey sites. The sample size of independent records appears to the right of the survey site above the frame. Abbreviations: ASBC = Alexander Skutch Biological Corridor; Cabo Blanco = Cabo Blanco National Park; Chirripo = Chirripo National Park; Marta, Copal = La Marta National Wildlife Refuge and El Copal Reserve; PILA = La Amistad International Park; PNLC = La Cangreja National Park; Savegre = Savegre Valley (Savegre Reserve and Los Quetzales National Park); Tapantí = Tapantí Macizo de la Muerte National Park. Skunk exhibited a nocturnal activity pattern at all survey sites.

# Paca activity patterns across sites

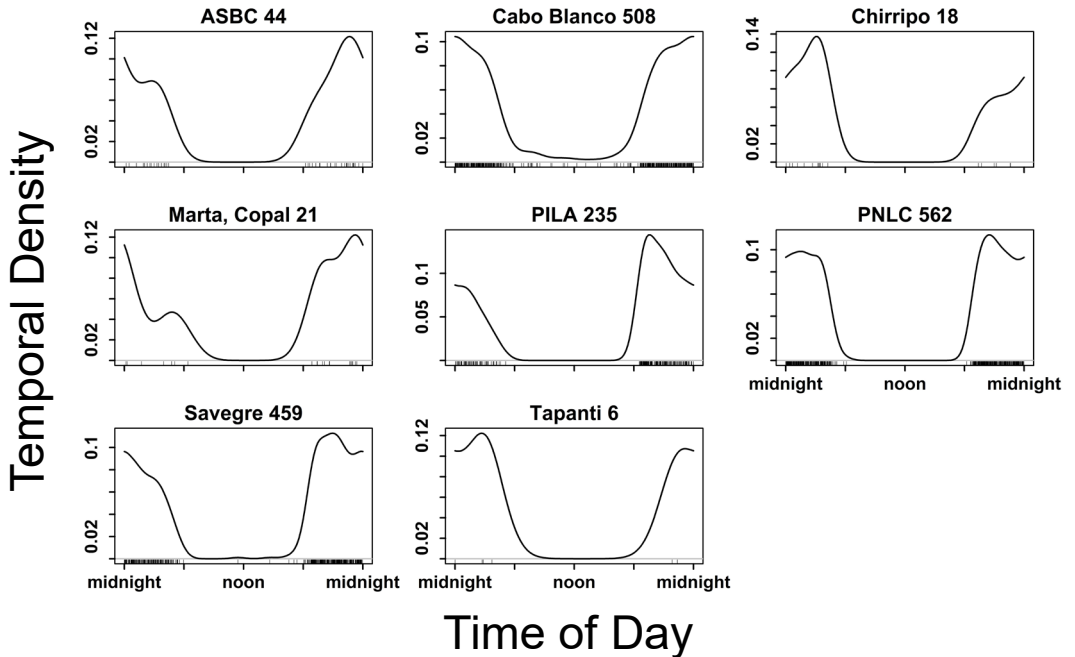

**Supplementary Data SD10-11.** Comparison of circadian activity density for paca (*Cuniculus paca*) across 8 survey sites. The sample size of independent records appears to the right of the survey site above the frame. Abbreviations: ASBC = Alexander Skutch Biological Corridor; Cabo Blanco = Cabo Blanco National Park; Chirripo = Chirripo National Park; Marta, Copal = La Marta National Wildlife Refuge and El Copal Reserve; PILA = La Amistad International Park; PNLC = La Cangreja National Park; Savegre = Savegre Valley (Savegre Reserve and Los Quetzales National Park); Tapanti = Tapantí Macizo de la Muerte National Park. Paca exhibited an exclusively nocturnal activity pattern at all survey sites.

# Agouti activity patterns across sites

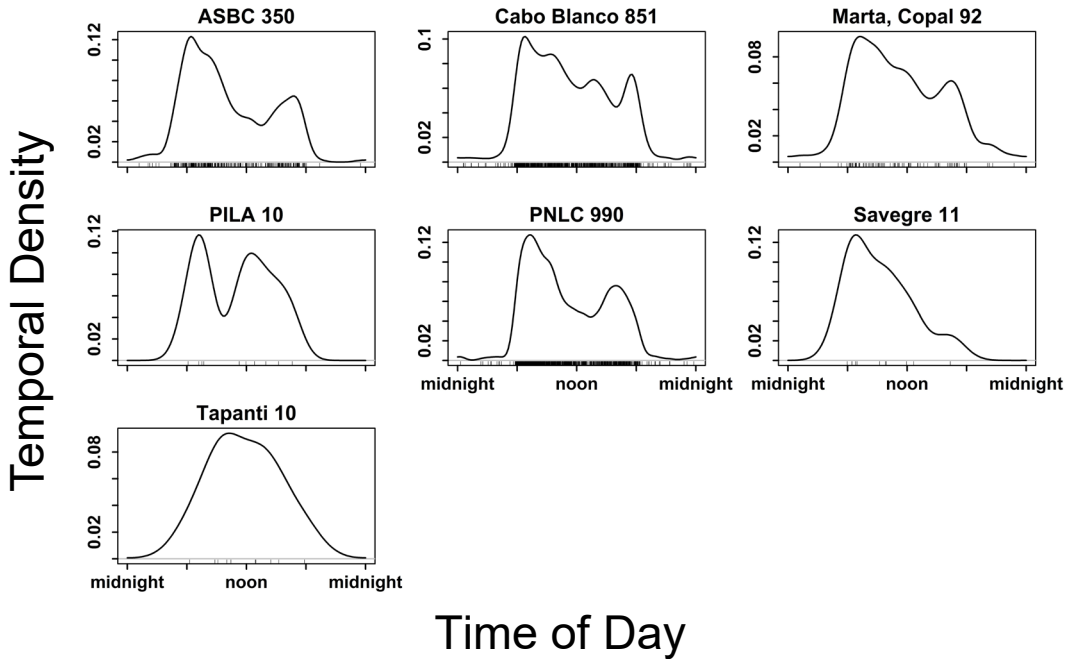

**Supplementary Data SD10-12.** Comparison of circadian activity density for Central American agouti (*Dasyprocta punctata*) across 7 survey sites. The sample size of independent records appears to the right of the survey site above the frame. Abbreviations: ASBC = Alexander Skutch Biological Corridor; Cabo Blanco = Cabo Blanco National Park; Marta, Copal = La Marta National Wildlife Refuge and El Copal Reserve; PILA = La Amistad International Park; PNLC = La Cangreja National Park; Savegre = Savegre Valley (Savegre Reserve and Los Quetzales National Park); Tapanti = Tapanti Macizo de la Muerte National Park. Agouti exhibited an exclusively diurnal activity pattern at all survey sites.

# Armadillo activity patterns across sites

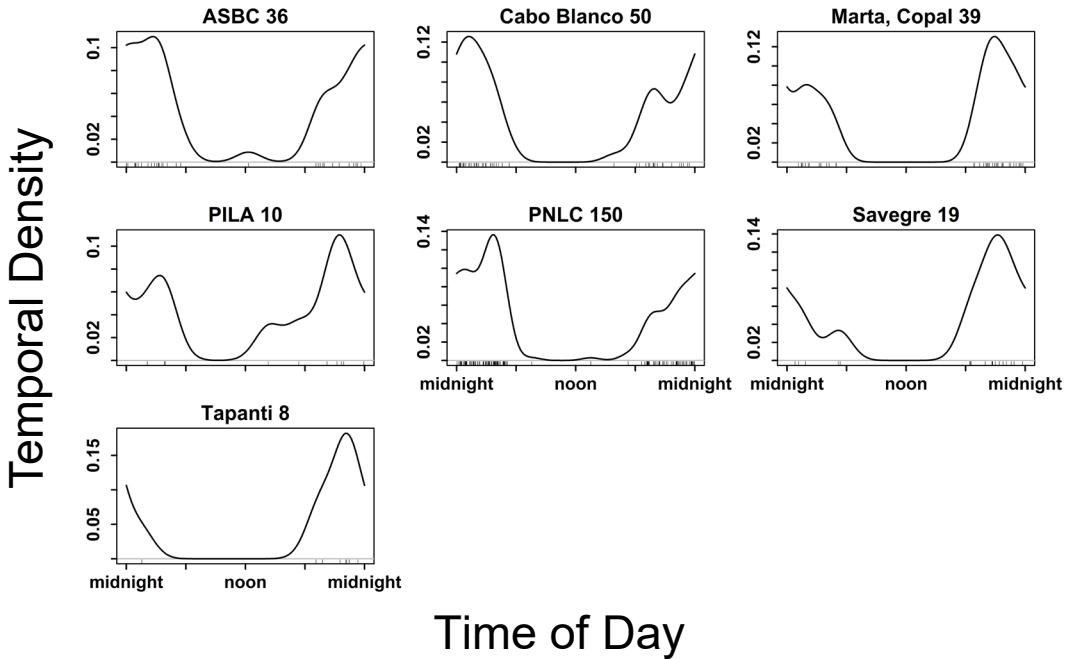

**Supplementary Data SD10-13.** Comparison of circadian activity density for the nine-banded armadillo (*Dasypus novemcinctus*) across 7 survey sites. The sample size of independent records appears to the right of the survey site above the frame. Abbreviations: ASBC = Alexander Skutch Biological Corridor; Cabo Blanco = Cabo Blanco National Park; Marta, Copal = La Marta National Wildlife Refuge and El Copal Reserve; PILA = La Amistad International Park; PNLC = La Cangreja National Park; Savegre = Savegre Valley (Savegre Reserve and Los Quetzales National Park); Tapanti = Tapanti Macizo de la Muerte National Park. Armadillos exhibited a nocturnal activity pattern at all survey sites.

# Common Opossum activity patterns across sites

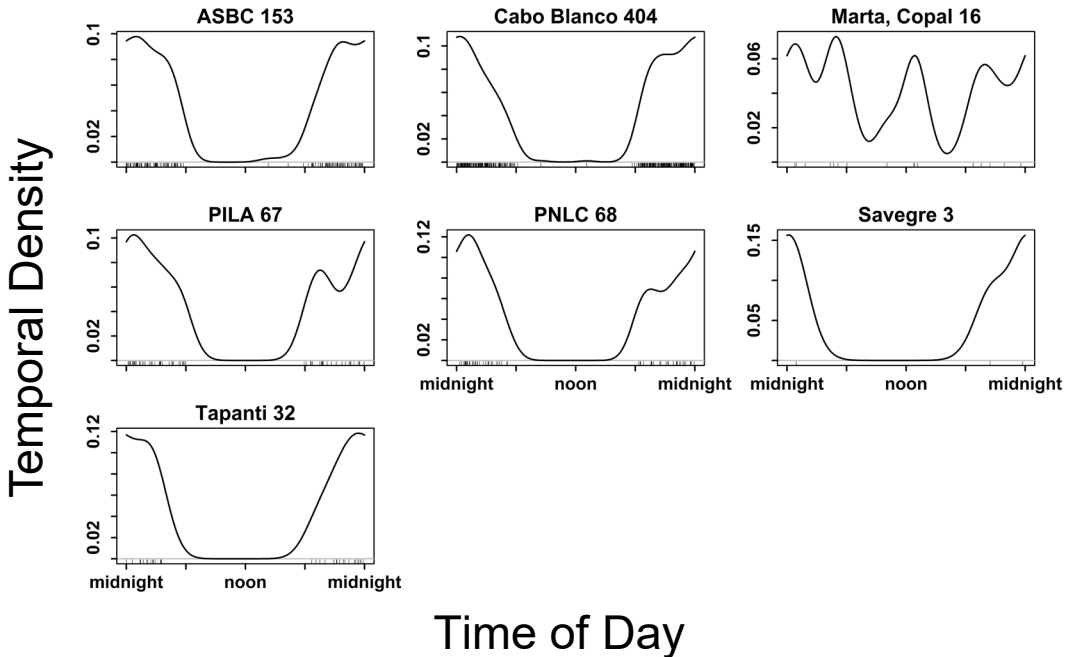

**Supplementary Data SD10-14.** Comparison of circadian activity density for the common opossum (*Didelphis marsupialis*) across 7 survey sites. The sample size of independent records appears to the right of the survey site above the frame. Abbreviations: ASBC = Alexander Skutch Biological Corridor; Cabo Blanco = Cabo Blanco National Park; Marta, Copal = La Marta National Wildlife Refuge and El Copal Reserve; PILA = La Amistad International Park; PNLC = La Cangreja National Park; Savegre = Savegre Valley (Savegre Reserve and Los Quetzales National Park); Tapantí = Tapantí Macizo de la Muerte National Park. Common opossum exhibited a nocturnal activity pattern at all survey sites except La Marta-El Copal, where they had a midday activity phase.

# Red Brocket Deer activity patterns across sites

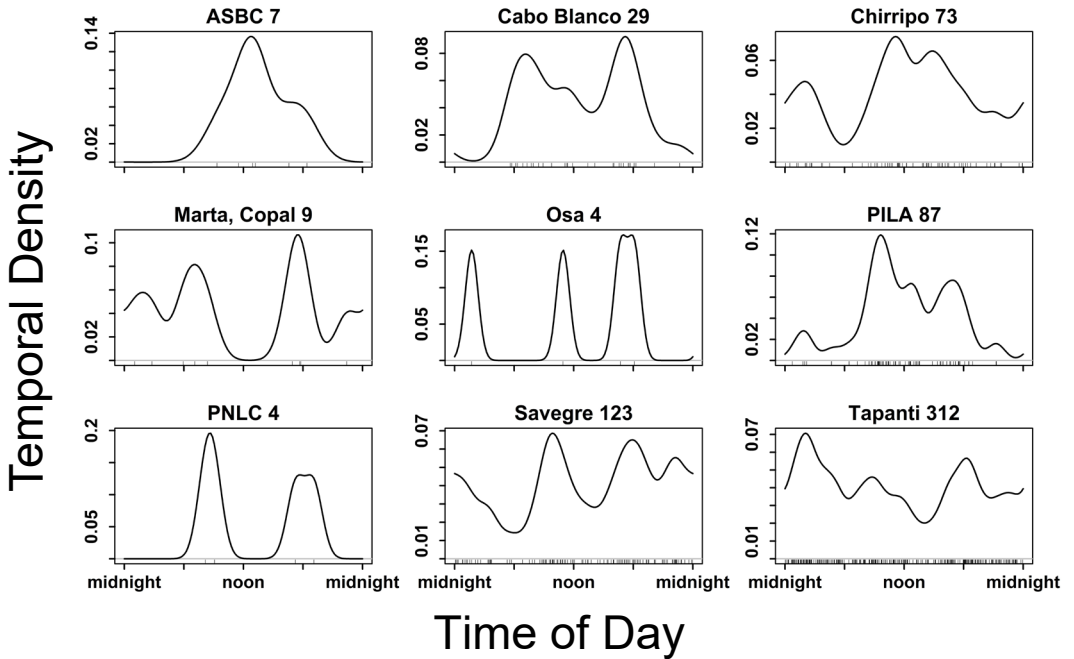

**Supplementary Data SD10-15.** Comparison of circadian activity density for the red brocket deer (*Mazama temama*) across 9 survey sites. The sample size of independent records appears to the right of the survey site above the frame. Abbreviations: ASBC = Alexander Skutch Biological Corridor; Cabo Blanco = Cabo Blanco National Park; Chirripo = Chirripo National Park; Marta, Copal = La Marta National Wildlife Refuge and El Copal Reserve; Osa = Proyecto Campanario Biological Station, Osa Peninsula; PILA = La Amistad International Park; PNLC = La Cangreja National Park; Savegre = Savegre Valley (Savegre Reserve and Los Quetzales National Park); Tapantí = Tapantí Macizo de la Muerte National Park. Red brocket deer exhibited a diurnal or mostly diurnal activity pattern at all survey sites with a midday reduction in activity at most sites.

# Coati activity patterns across sites

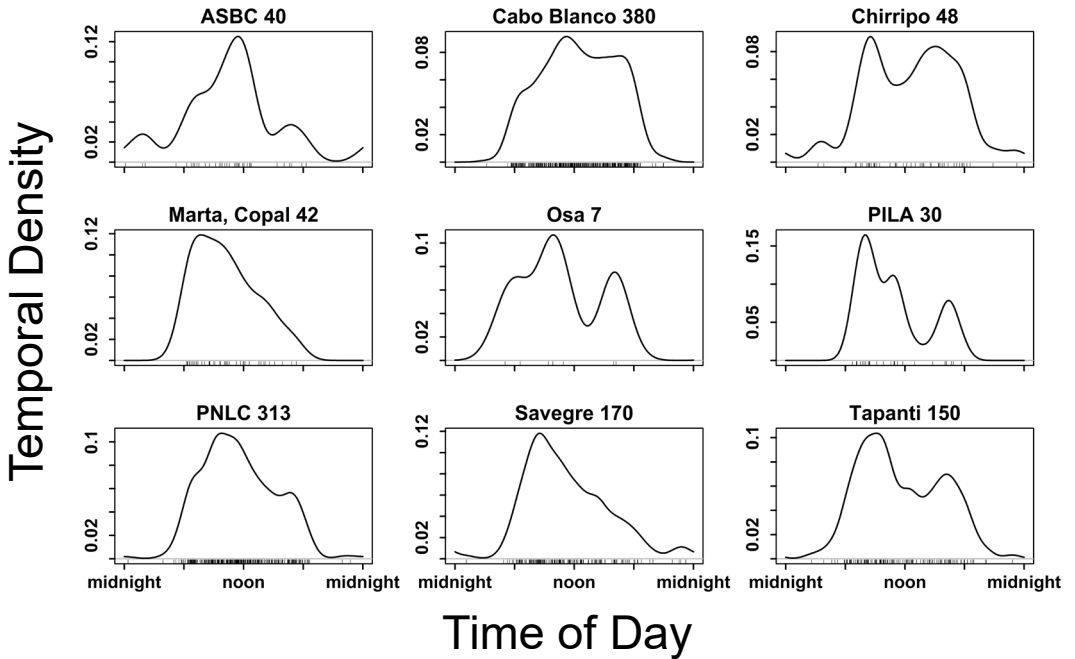

**Supplementary Data SD10-16.** Comparison of circadian activity density for the white-nosed coati (*Nasua narica*) across 9 survey sites. The sample size of independent records appears to the right of the survey site above the frame. Abbreviations: ASBC = Alexander Skutch Biological Corridor; Cabo Blanco = Cabo Blanco National Park; Chirripo = Chirripo National Park; Marta, Copal = La Marta National Wildlife Refuge and El Copal Reserve; Osa = Proyecto Campanario Biological Station, Osa Peninsula; PILA = La Amistad International Park; PNLK = La Cangreja National Park; Savegre = Savegre Valley (Savegre Reserve and Los Quetzales National Park); Tapanti = Tapanti Macizo de la Muerte National Park. Coati exhibited a diurnal activity pattern at all survey sites, usually with a late morning activity peak.



# White-tailed Deer activity patterns across sites

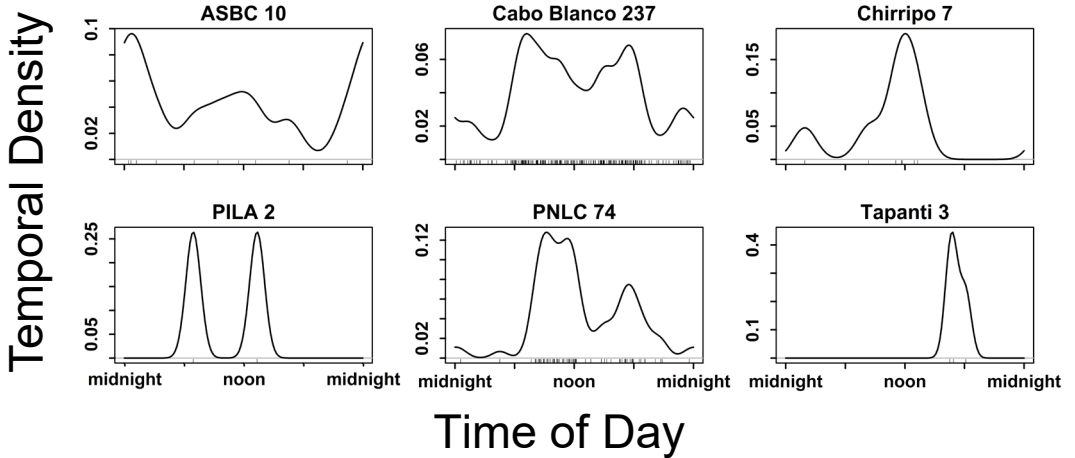

**Supplementary Data SD10-17.** Comparison of circadian activity density for the white-tailed deer (*Odocoileus virginianus*) across 6 survey sites. The sample size of independent records appears to the right of the survey site above the frame. Abbreviations: ASBC = Alexander Skutch Biological Corridor; Cabo Blanco = Cabo Blanco National Park; Chirripo = Chirripo National Park; PILA = La Amistad International Park; PNLC = La Cangreja National Park; Tapantí = Tapantí Macizo de la Muerte National Park. White-tailed deer exhibited a mostly diurnal activity pattern at all survey sites, often with a late morning activity peak.

# Collared Peccary activity patterns across sites

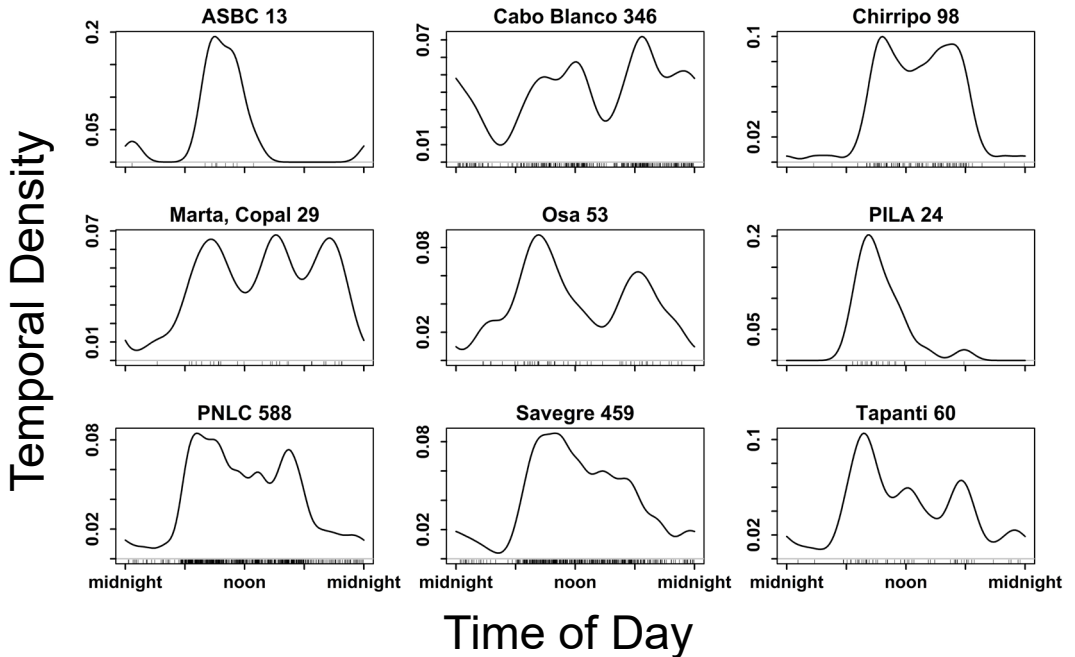

**Supplementary Data SD10-18.** Comparison of circadian activity density for collared peccary (*Pecari tajacu*) across 9 survey sites. The sample size of independent records appears to the right of the survey site above the frame. Abbreviations: ASBC = Alexander Skutch Biological Corridor; Cabo Blanco = Cabo Blanco National Park; Chirripo = Chirripo National Park; Marta, Copal = La Marta National Wildlife Refuge and El Copal Reserve; Osa = Proyecto Campanario Biological Station, Osa Peninsula; PILA = La Amistad International Park; PNLK = La Cangreja National Park; Savegre = Savegre Valley (Savegre Reserve and Los Quetzales National Park); Tapantí = Tapantí Macizo de la Muerte National Park. Peccary exhibited a mostly diurnal activity pattern at all survey sites, typically with a late morning activity peak.

# Four-eyed Opossum activity patterns across sites

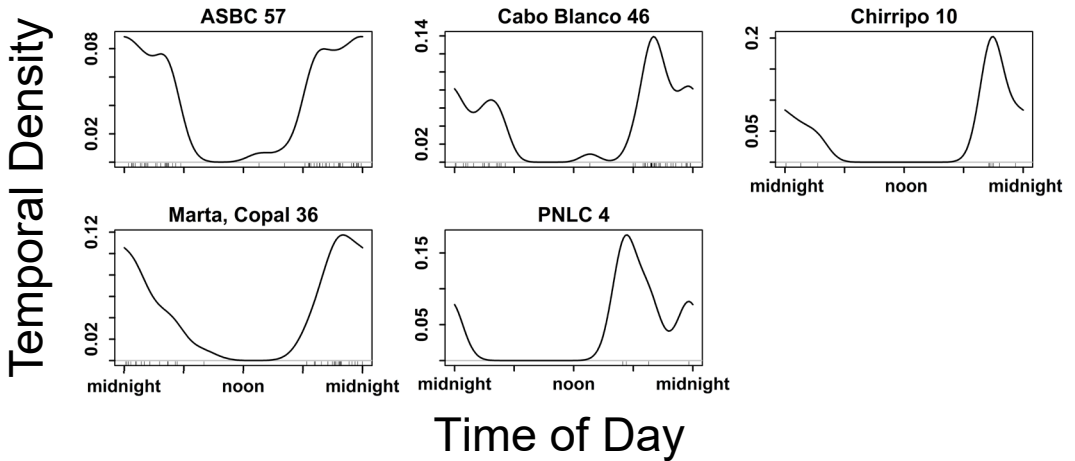

**Supplementary Data SD10-19.** Comparison of circadian activity density for gray four-eyed opossum (*Philander opossum*) across 5 survey sites. The sample size of independent records appears to the right of the survey site above the frame. Abbreviations: ASBC = Alexander Skutch Biological Corridor; Cabo Blanco = Cabo Blanco National Park; Chirripo = Chirripo National Park; Marta, Copal = La Marta National Wildlife Refuge and El Copal Reserve; PNL = La Cangreja National Park. Four-eyed opossum exhibited a nocturnal activity pattern at all survey sites.

# Raccoon activity patterns across sites

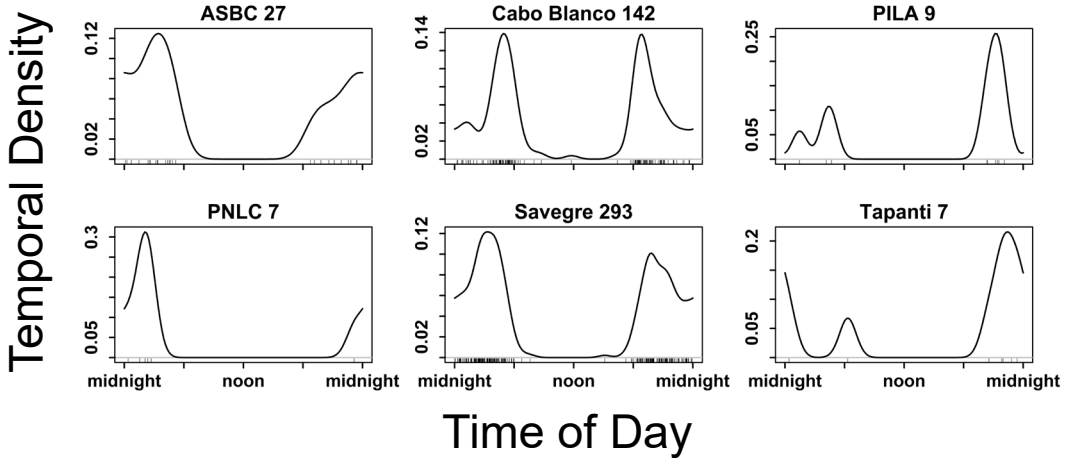

**Supplementary Data SD10-20.** Comparison of circadian activity density for northern raccoon (*Procyon lotor*) across 6 survey sites. The sample size of independent records appears to the right of the survey site above the frame. Abbreviations: ASBC = Alexander Skutch Biological Corridor; Cabo Blanco = Cabo Blanco National Park; PILA = La Amistad International Park; PNLC = La Cangreja National Park; Savegre = Savegre Valley (Savegre Reserve and Los Quetzales National Park); Tapantí = Tapantí Macizo de la Muerte National Park. Raccoons exhibited a nocturnal activity pattern at all survey sites.

# Dice's Cottontail activity patterns across sites

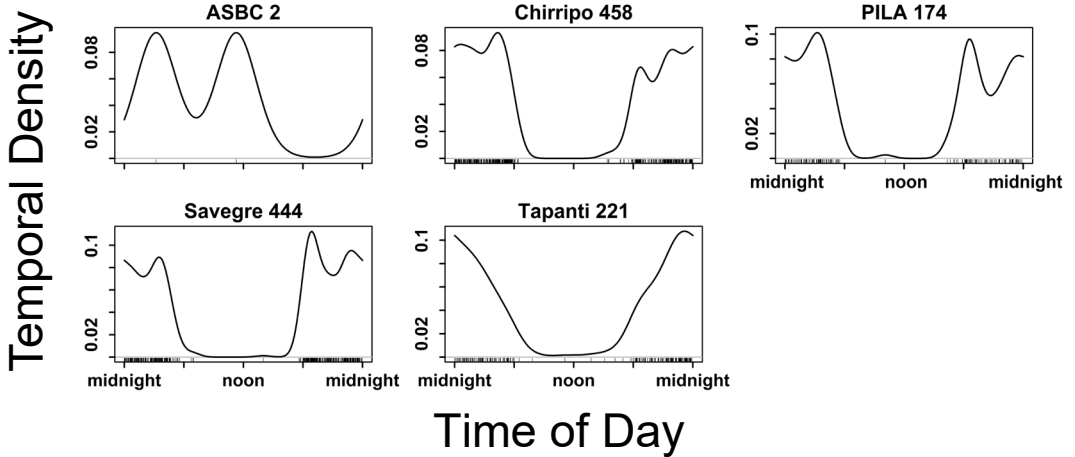

**Supplementary Data SD10-21.** Comparison of circadian activity density for Dice's cottontail (*Sylvilagus dicei*) across 5 survey sites. The sample size of independent records appears to the right of the survey site above the frame. Abbreviations: ASBC = Alexander Skutch Biological Corridor; Chirripo = Chirripo National Park; PILA = La Amistad International Park; Savegre = Savegre Valley (Savegre Reserve and Los Quetzales National Park); Tapantí = Tapantí Macizo de la Muerte National Park. Cottontails exhibited a nocturnal activity pattern at all survey sites except ASBC, which had a very small sample size.

# Tamandua activity patterns across sites

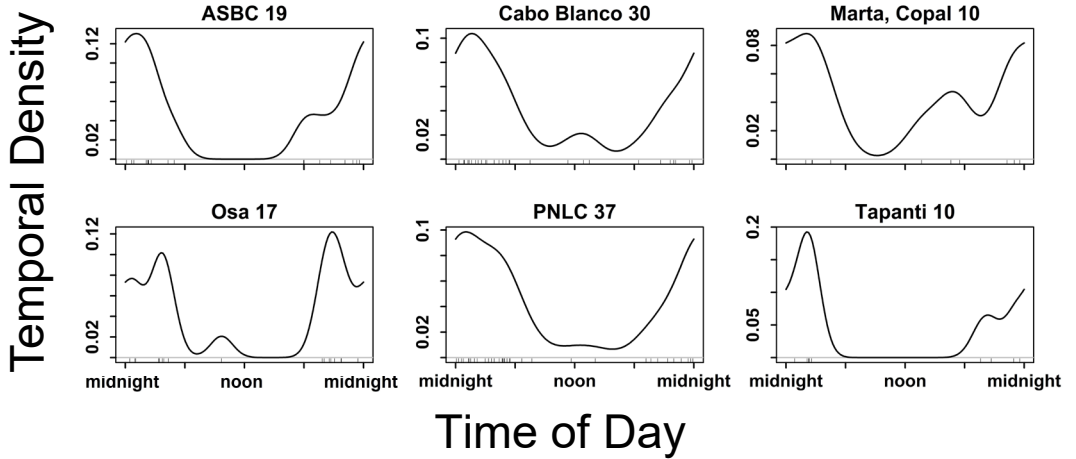

**Supplementary Data SD10-22.** Comparison of circadian activity density for the northern tamandua (*Tamandua mexicana*) across 6 survey sites. The sample size of independent records appears to the right of the survey site above the frame. Abbreviations: ASBC = Alexander Skutch Biological Corridor; Cabo Blanco = Cabo Blanco National Park; Marta, Copal = La Marta National Wildlife Refuge and El Copal Reserve; Osa = Proyecto Campanario Biological Station, Osa Peninsula; PNLC = La Cangreja National Park; Tapanti = Tapanti Macizo de la Muerte National Park. Tamandua exhibited a nocturnal activity pattern at all survey sites.

# Baird's Tapir activity patterns across sites

Temporal Density

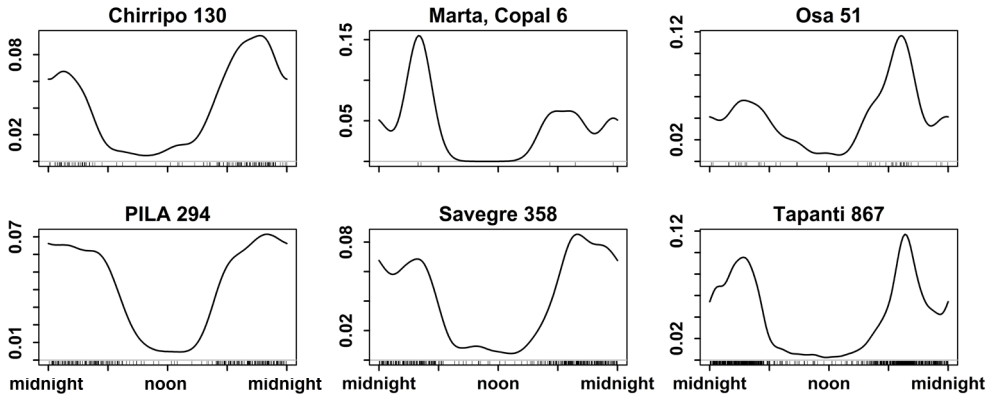

Time of Day

**Supplementary Data SD10-23.** Comparison of circadian activity density for Baird's tapir (*Tapirus bairdii*) across 6 survey sites. The sample size of independent records appears to the right of the survey site above the frame. Abbreviations: Chirripo = Chirripo National Park; Marta, Copal = La Marta National Wildlife Refuge and El Copal Reserve; Osa = Proyecto Campanario Biological Station, Osa Peninsula; PILA = La Amistad International Park; Savegre = Savegre Valley (Savegre Reserve and Los Quetzales National Park); Tapanti = Tapanti Macizo de la Muerte National Park. Tapir exhibited a mostly nocturnal activity pattern at all survey sites.
